# Supplementary material for: Indoor residual spraying with a mixture of clothianidin (a neonicotinoid insecticide) and deltamethrin provides improved control and long residual activity against pyrethroid resistant Anopheles gambiae sl in Southern Benin
Source: PLoS One. 2017 Dec 18;12(12):e0189575. doi: 10.1371/journal.pone.0189575 (PMC5734732; doi:10.1371/journal.pone.0189575)
Supplement: S1 Table — (XLSX) [file pone.0189575.s001.xlsx]

## Sheet: Sheet2
day	hut	treat	sleeper	vrex_ufl	vrex_bfl	vrex_ufd	vrex_bfd	room_ufl	room_bfl	room_ufd	room_bfd	net_ufl	net_bfl	net_ufd	net_bfd	imm_dead	unf_live	unf_dead	bf_live	bf_dead	tot_unf	tot_blf	tot_live	tot_dead	tot_exop	tot_net	total	one	%bl_fed	%dead	%exophil	%net
1	0	0	0	15	9	1	0	13	14	0	0	0	0	0	0	0	28	1	23	0	29	23	51	1	25	0	52	1	44.2308	1.92308	48.0769	0
2	0	0	0	24	28	3	0	1	1	1	0	0	0	0	0	1	25	4	29	0	29	29	54	4	55	0	58	1	50	6.89655	94.8276	0
3	0	0	0	15	9	2	0	37	2	0	0	0	0	0	0	0	52	2	11	0	54	11	63	2	26	0	65	1	16.9231	3.07692	40	0
4	0	0	0	12	10	0	0	8	2	0	0	0	0	0	0	0	20	0	12	0	20	12	32	0	22	0	32	1	37.5	0	68.75	0
5	0	0	0	17	3	3	0	31	1	0	0	0	0	0	0	0	48	3	4	0	51	4	52	3	23	0	55	1	7.27273	5.45455	41.8182	0
6	0	0	0	10	100	19	0	10	133	0	0	0	0	0	0	0	20	19	233	0	39	233	253	19	129	0	272	1	85.6618	6.98529	47.4265	0
7	0	0	0	4	34	2	13	3	61	0	0	0	0	0	0	0	7	2	95	13	9	108	102	15	53	0	117	1	92.3077	12.8205	45.2991	0
8	0	0	0	11	44	14	19	11	48	6	0	0	0	0	0	6	22	20	92	19	42	111	114	39	88	0	153	1	72.549	25.4902	57.5163	0
9	0	0	0	37	28	10	15	10	79	0	0	0	0	0	0	0	47	10	107	15	57	122	154	25	90	0	179	1	68.1564	13.9665	50.2793	0
10	0	0	0	2	81	9	24	14	65	7	0	0	0	0	0	7	16	16	146	24	32	170	162	40	116	0	202	1	84.1584	19.802	57.4257	0
11	0	0	0	13	94	3	33	8	175	3	1	0	0	0	0	4	21	6	269	34	27	303	290	40	143	0	330	1	91.8182	12.1212	43.3333	0
12	0	0	0	2	70	1	27	3	122	2	3	0	0	0	0	5	5	3	192	30	8	222	197	33	100	0	230	1	96.5217	14.3478	43.4783	0
13	0	0	0	3	54	0	15	8	45	0	0	0	0	0	0	0	11	0	99	15	11	114	110	15	72	0	125	1	91.2	12	57.6	0
14	0	0	0	29	40	1	14	25	104	1	0	0	0	0	0	1	54	2	144	14	56	158	198	16	84	0	214	1	73.8318	7.47664	39.2523	0
15	0	0	0	19	81	1	1	4	62	2	0	0	0	0	0	2	23	3	143	1	26	144	166	4	102	0	170	1	84.7059	2.35294	60	0
16	0	0	0	21	5	3	3	11	37	0	0	0	0	0	0	0	32	3	42	3	35	45	74	6	32	0	80	1	56.25	7.5	40	0
17	0	0	0	61	24	3	12	16	32	0	0	0	0	0	0	0	77	3	56	12	80	68	133	15	100	0	148	1	45.9459	10.1351	67.5676	0
18	0	0	0	23	54	0	23	57	76	1	0	0	0	0	0	1	80	1	130	23	81	153	210	24	100	0	234	1	65.3846	10.2564	42.735	0
19	0	0	0	0	66	1	3	0	83	0	1	0	0	0	0	1	0	1	149	4	1	153	149	5	70	0	154	1	99.3506	3.24675	45.4545	0
20	0	0	0	22	2	2	0	26	26	1	1	0	0	0	0	2	48	3	28	1	51	29	76	4	26	0	80	1	36.25	5	32.5	0
21	0	0	0	11	8	1	1	6	18	0	0	0	0	0	0	0	17	1	26	1	18	27	43	2	21	0	45	1	60	4.44444	46.6667	0
22	0	0	0	50	16	3	4	30	14	0	0	0	0	0	0	0	80	3	30	4	83	34	110	7	73	0	117	1	29.0598	5.98291	62.3932	0
23	0	0	0	11	122	4	0	29	48	0	0	0	0	0	0	0	40	4	170	0	44	170	210	4	137	0	214	1	79.4393	1.86916	64.0187	0
24	0	0	0	12	32	1	2	4	28	0	0	0	0	0	0	0	16	1	60	2	17	62	76	3	47	0	79	1	78.481	3.79747	59.4937	0
25	0	0	0	45	17	1	1	16	8	0	0	0	0	0	0	0	61	1	25	1	62	26	86	2	64	0	88	1	29.5455	2.27273	72.7273	0
26	0	0	0	17	43	0	2	33	40	3	0	0	0	0	0	3	50	3	83	2	53	85	133	5	62	0	138	1	61.5942	3.62319	44.9275	0
27	0	0	0	13	19	3	2	23	37	5	4	0	0	0	0	9	36	8	56	6	44	62	92	14	37	0	106	1	58.4906	13.2075	34.9057	0
28	0	0	0	0	80	0	4	0	121	0	0	0	0	0	0	0	0	0	201	4	0	205	201	4	84	0	205	1	100	1.95122	40.9756	0
29	0	0	0	0	35	0	2	6	119	0	0	0	0	0	0	0	6	0	154	2	6	156	160	2	37	0	162	1	96.2963	1.23457	22.8395	0
30	0	0	0	0	39	0	1	0	87	0	0	0	0	0	0	0	0	0	126	1	0	127	126	1	40	0	127	1	100	0.787402	31.4961	0
31	0	0	0	3	19	0	2	10	17	0	0	0	0	0	0	0	13	0	36	2	13	38	49	2	24	0	51	1	74.5098	3.92157	47.0588	0
32	0	0	0	0	51	0	2	0	53	0	0	0	0	0	0	0	0	0	104	2	0	106	104	2	53	0	106	1	100	1.88679	50	0
33	0	0	0	2	31	1	2	1	45	0	0	0	0	0	0	0	3	1	76	2	4	78	79	3	36	0	82	1	95.122	3.65854	43.9024	0
34	0	0	0	3	38	0	2	0	27	0	0	0	0	0	0	0	3	0	65	2	3	67	68	2	43	0	70	1	95.7143	2.85714	61.4286	0
35	0	0	0	5	58	0	3	0	33	0	0	0	0	0	0	0	5	0	91	3	5	94	96	3	66	0	99	1	94.9495	3.0303	66.6667	0
36	0	0	0	3	24	0	3	0	31	0	0	0	0	0	0	0	3	0	55	3	3	58	58	3	30	0	61	1	95.082	4.91803	49.1803	0
37	0	0	0	0	84	0	3	0	39	0	0	0	0	0	0	0	0	0	123	3	0	126	123	3	87	0	126	1	100	2.38095	69.0476	0
38	0	0	0	1	48	0	2	0	50	0	0	0	0	0	0	0	1	0	98	2	1	100	99	2	51	0	101	1	99.0099	1.9802	50.495	0
39	0	0	0	0	42	0	2	0	80	0	0	0	0	0	0	0	0	0	122	2	0	124	122	2	44	0	124	1	100	1.6129	35.4839	0
40	0	0	0	0	57	0	0	0	11	0	0	0	0	0	0	0	0	0	68	0	0	68	68	0	57	0	68	1	100	0	83.8235	0
41	0	0	0	3	18	1	1	6	17	0	1	0	0	0	0	1	9	1	35	2	10	37	44	3	23	0	47	1	78.7234	6.38298	48.9362	0
42	0	0	0	3	21	0	0	1	14	0	0	0	0	0	0	0	4	0	35	0	4	35	39	0	24	0	39	1	89.7436	0	61.5385	0
43	0	0	0	3	21	1	0	0	37	0	0	0	0	0	0	0	3	1	58	0	4	58	61	1	25	0	62	1	93.5484	1.6129	40.3226	0
44	0	0	0	0	29	0	1	0	22	0	0	0	0	0	0	0	0	0	51	1	0	52	51	1	30	0	52	1	100	1.92308	57.6923	0
45	0	0	0	0	50	0	1	0	21	0	0	0	0	0	0	0	0	0	71	1	0	72	71	1	51	0	72	1	100	1.38889	70.8333	0
46	0	0	0	0	23	0	2	0	36	0	0	0	0	0	0	0	0	0	59	2	0	61	59	2	25	0	61	1	100	3.27869	40.9836	0
47	0	0	0	0	28	0	2	0	22	0	0	0	0	0	0	0	0	0	50	2	0	52	50	2	30	0	52	1	100	3.84615	57.6923	0
48	0	0	0	0	21	0	1	0	3	0	0	0	0	0	0	0	0	0	24	1	0	25	24	1	22	0	25	1	100	4	88	0
49	0	0	0	2	20	0	1	0	71	2	0	0	0	0	0	2	2	2	91	1	4	92	93	3	23	0	96	1	95.8333	3.125	23.9583	0
50	0	0	0	5	8	0	1	2	13	0	0	0	0	0	0	0	7	0	21	1	7	22	28	1	14	0	29	1	75.8621	3.44828	48.2759	0
51	0	0	0	0	2	0	2	0	14	0	0	0	0	0	0	0	0	0	16	2	0	18	16	2	4	0	18	1	100	11.1111	22.2222	0
52	0	0	0	1	4	0	1	2	19	0	0	0	0	0	0	0	3	0	23	1	3	24	26	1	6	0	27	1	88.8889	3.7037	22.2222	0
53	0	0	0	0	12	0	1	2	27	0	0	0	0	0	0	0	2	0	39	1	2	40	41	1	13	0	42	1	95.2381	2.38095	30.9524	0
54	0	0	0	0	11	0	1	0	29	0	0	0	0	0	0	0	0	0	40	1	0	41	40	1	12	0	41	1	100	2.43902	29.2683	0
55	0	0	0	2	10	0	0	0	24	0	0	0	0	0	0	0	2	0	34	0	2	34	36	0	12	0	36	1	94.4444	0	33.3333	0
56	0	0	0	2	8	0	1	0	28	0	0	0	0	0	0	0	2	0	36	1	2	37	38	1	11	0	39	1	94.8718	2.5641	28.2051	0
57	0	0	0	1	6	0	1	0	33	0	0	0	0	0	0	0	1	0	39	1	1	40	40	1	8	0	41	1	97.561	2.43902	19.5122	0
58	0	0	0	9	24	0	2	7	22	0	0	0	0	0	0	0	16	0	46	2	16	48	62	2	35	0	64	1	75	3.125	54.6875	0
59	0	0	0	3	14	0	4	0	24	0	0	0	0	0	0	0	3	0	38	4	3	42	41	4	21	0	45	1	93.3333	8.88889	46.6667	0
60	0	0	0	0	21	0	2	0	13	0	0	0	0	0	0	0	0	0	34	2	0	36	34	2	23	0	36	1	100	5.55556	63.8889	0
61	0	0	0	0	25	0	3	0	15	0	0	0	0	0	0	0	0	0	40	3	0	43	40	3	28	0	43	1	100	6.97674	65.1163	0
62	0	0	0	0	6	0	4	0	31	0	0	0	0	0	0	0	0	0	37	4	0	41	37	4	10	0	41	1	100	9.7561	24.3902	0
63	0	0	0	0	9	0	4	0	36	0	0	0	0	0	0	0	0	0	45	4	0	49	45	4	13	0	49	1	100	8.16327	26.5306	0
64	0	0	0	0	3	0	4	0	18	0	0	0	0	0	0	0	0	0	21	4	0	25	21	4	7	0	25	1	100	16	28	0
65	0	0	0	0	36	0	3	0	25	0	0	0	0	0	0	0	0	0	61	3	0	64	61	3	39	0	64	1	100	4.6875	60.9375	0
66	0	0	0	0	11	1	4	1	64	0	0	0	0	0	0	0	1	1	75	4	2	79	76	5	16	0	81	1	97.5309	6.17284	19.7531	0
67	0	0	0	0	15	0	4	0	31	0	0	0	0	0	0	0	0	0	46	4	0	50	46	4	19	0	50	1	100	8	38	0
68	0	0	0	0	5	0	2	0	9	0	0	0	0	0	0	0	0	0	14	2	0	16	14	2	7	0	16	1	100	12.5	43.75	0
69	0	0	0	0	20	0	2	2	45	0	0	0	0	0	0	0	2	0	65	2	2	67	67	2	22	0	69	1	97.1014	2.89855	31.8841	0
70	0	0	0	0	9	0	3	1	26	0	0	0	0	0	0	0	1	0	35	3	1	38	36	3	12	0	39	1	97.4359	7.69231	30.7692	0
71	0	0	0	0	24	0	1	0	16	0	0	0	0	0	0	0	0	0	40	1	0	41	40	1	25	0	41	1	100	2.43902	60.9756	0
72	0	0	0	0	10	0	2	0	24	0	0	0	0	0	0	0	0	0	34	2	0	36	34	2	12	0	36	1	100	5.55556	33.3333	0
73	0	0	0	0	11	0	1	0	28	0	0	0	0	0	0	0	0	0	39	1	0	40	39	1	12	0	40	1	100	2.5	30	0
74	0	0	0	0	10	0	1	1	27	0	0	0	0	0	0	0	1	0	37	1	1	38	38	1	11	0	39	1	97.4359	2.5641	28.2051	0
75	0	0	0	0	33	0	1	0	20	0	0	0	0	0	0	0	0	0	53	1	0	54	53	1	34	0	54	1	100	1.85185	62.963	0
76	0	0	0	0	5	0	2	0	14	0	0	0	0	0	0	0	0	0	19	2	0	21	19	2	7	0	21	1	100	9.52381	33.3333	0
77	0	0	0	0	13	0	4	1	53	0	0	0	0	0	0	0	1	0	66	4	1	70	67	4	17	0	71	1	98.5915	5.6338	23.9437	0
78	0	0	0	0	18	0	1	2	29	0	0	0	0	0	0	0	2	0	47	1	2	48	49	1	19	0	50	1	96	2	38	0
79	0	0	0	1	18	0	1	0	57	0	0	0	0	0	0	0	1	0	75	1	1	76	76	1	20	0	77	1	98.7013	1.2987	25.974	0
80	0	0	0	0	8	0	1	2	26	0	0	0	0	0	0	0	2	0	34	1	2	35	36	1	9	0	37	1	94.5946	2.7027	24.3243	0
81	0	0	0	0	8	0	1	0	11	0	0	0	0	0	0	0	0	0	19	1	0	20	19	1	9	0	20	1	100	5	45	0
82	0	0	0	3	4	0	3	3	15	0	0	0	0	0	0	0	6	0	19	3	6	22	25	3	10	0	28	1	78.5714	10.7143	35.7143	0
83	0	0	0	0	12	0	3	1	40	0	0	0	0	0	0	0	1	0	52	3	1	55	53	3	15	0	56	1	98.2143	5.35714	26.7857	0
84	0	0	0	0	32	0	0	0	18	0	0	0	0	0	0	0	0	0	50	0	0	50	50	0	32	0	50	1	100	0	64	0
85	0	0	0	0	22	0	2	3	21	0	0	0	0	0	0	0	3	0	43	2	3	45	46	2	24	0	48	1	93.75	4.16667	50	0
86	0	0	0	0	4	0	2	1	26	0	0	0	0	0	0	0	1	0	30	2	1	32	31	2	6	0	33	1	96.9697	6.06061	18.1818	0
87	0	0	0	0	19	0	2	0	35	0	0	0	0	0	0	0	0	0	54	2	0	56	54	2	21	0	56	1	100	3.57143	37.5	0
88	0	0	0	8	19	0	2	4	49	0	0	0	0	0	0	0	12	0	68	2	12	70	80	2	29	0	82	1	85.3659	2.43902	35.3659	0
89	0	0	0	0	20	2	0	2	22	0	0	0	0	0	0	0	2	2	42	0	4	42	44	2	22	0	46	1	91.3043	4.34783	47.8261	0
90	0	0	0	1	18	1	8	2	89	0	0	0	0	0	0	0	3	1	107	8	4	115	110	9	28	0	119	1	96.6387	7.56303	23.5294	0
91	0	0	0	1	3	0	0	0	8	0	0	0	0	0	0	0	1	0	11	0	1	11	12	0	4	0	12	1	91.6667	0	33.3333	0
92	0	0	0	1	12	0	4	1	20	0	0	0	0	0	0	0	2	0	32	4	2	36	34	4	17	0	38	1	94.7368	10.5263	44.7368	0
93	0	0	0	1	7	1	2	0	11	0	0	0	0	0	0	0	1	1	18	2	2	20	19	3	11	0	22	1	90.9091	13.6364	50	0
94	0	0	0	1	6	0	3	0	9	0	0	0	0	0	0	0	1	0	15	3	1	18	16	3	10	0	19	1	94.7368	15.7895	52.6316	0
95	0	0	0	0	23	0	4	0	46	0	0	0	0	0	0	0	0	0	69	4	0	73	69	4	27	0	73	1	100	5.47945	36.9863	0
96	0	0	0	0	18	1	5	0	21	0	0	0	0	0	0	0	0	1	39	5	1	44	39	6	24	0	45	1	97.7778	13.3333	53.3333	0
97	0	0	0	0	10	0	5	0	51	0	0	0	0	0	0	0	0	0	61	5	0	66	61	5	15	0	66	1	100	7.57576	22.7273	0
98	0	0	0	0	5	0	2	1	34	0	0	0	0	0	0	0	1	0	39	2	1	41	40	2	7	0	42	1	97.619	4.7619	16.6667	0
99	0	0	0	0	4	0	2	2	11	0	0	0	0	0	0	0	2	0	15	2	2	17	17	2	6	0	19	1	89.4737	10.5263	31.5789	0
100	0	0	0	0	10	0	5	0	30	0	0	0	0	0	0	0	0	0	40	5	0	45	40	5	15	0	45	1	100	11.1111	33.3333	0
101	0	0	0	2	24	0	2	0	55	0	0	0	0	0	0	0	2	0	79	2	2	81	81	2	28	0	83	1	97.5904	2.40964	33.7349	0
102	0	0	0	0	9	0	1	0	6	0	0	0	0	0	0	0	0	0	15	1	0	16	15	1	10	0	16	1	100	6.25	62.5	0
103	0	0	0	17	9	1	2	2	9	0	0	0	0	0	0	0	19	1	18	2	20	20	37	3	29	0	40	1	50	7.5	72.5	0
104	0	0	0	0	7	0	5	2	26	0	0	0	0	0	0	0	2	0	33	5	2	38	35	5	12	0	40	1	95	12.5	30	0
105	0	0	0	0	15	0	10	0	62	0	0	0	0	0	0	0	0	0	77	10	0	87	77	10	25	0	87	1	100	11.4943	28.7356	0
106	0	0	0	17	24	0	7	12	45	0	0	0	0	0	0	0	29	0	69	7	29	76	98	7	48	0	105	1	72.381	6.66667	45.7143	0
107	0	0	0	3	5	0	5	3	43	0	0	0	0	0	0	0	6	0	48	5	6	53	54	5	13	0	59	1	89.8305	8.47458	22.0339	0
108	0	0	0	0	8	0	2	0	26	0	0	0	0	0	0	0	0	0	34	2	0	36	34	2	10	0	36	1	100	5.55556	27.7778	0
109	0	0	0	0	6	0	2	0	45	0	0	0	0	0	0	0	0	0	51	2	0	53	51	2	8	0	53	1	100	3.77358	15.0943	0
110	0	0	0	0	2	0	1	0	15	0	0	0	0	0	0	0	0	0	17	1	0	18	17	1	3	0	18	1	100	5.55556	16.6667	0
111	0	0	0	0	3	0	3	0	14	0	0	0	0	0	0	0	0	0	17	3	0	20	17	3	6	0	20	1	100	15	30	0
112	0	0	0	0	5	0	3	0	32	0	0	0	0	0	0	0	0	0	37	3	0	40	37	3	8	0	40	1	100	7.5	20	0
113	0	0	0	1	2	0	2	0	9	0	0	0	0	0	0	0	1	0	11	2	1	13	12	2	5	0	14	1	92.8571	14.2857	35.7143	0
114	0	0	0	1	20	1	7	0	42	0	0	0	0	0	0	0	1	1	62	7	2	69	63	8	29	0	71	1	97.1831	11.2676	40.8451	0
115	0	0	0	0	4	0	2	1	39	0	0	0	0	0	0	0	1	0	43	2	1	45	44	2	6	0	46	1	97.8261	4.34783	13.0435	0
116	0	0	0	0	5	0	2	0	15	0	0	0	0	0	0	0	0	0	20	2	0	22	20	2	7	0	22	1	100	9.09091	31.8182	0
117	0	0	0	0	24	0	3	0	41	0	0	0	0	0	0	0	0	0	65	3	0	68	65	3	27	0	68	1	100	4.41176	39.7059	0
118	0	0	0	0	30	0	3	0	44	0	0	0	0	0	0	0	0	0	74	3	0	77	74	3	33	0	77	1	100	3.8961	42.8571	0
119	0	0	0	1	30	1	2	0	19	0	1	0	0	0	0	1	1	1	49	3	2	52	50	4	34	0	54	1	96.2963	7.40741	62.963	0
120	0	0	0	0	31	0	5	0	51	0	0	0	0	0	0	0	0	0	82	5	0	87	82	5	36	0	87	1	100	5.74713	41.3793	0
121	0	0	0	0	9	0	4	3	37	0	0	0	0	0	0	0	3	0	46	4	3	50	49	4	13	0	53	1	94.3396	7.54717	24.5283	0
1	0	1	0	8	3	1	0	0	0	0	0	0	0	0	0	0	8	1	3	0	9	3	11	1	12	0	12	1	25	8.33333	100	0
2	0	1	0	6	8	3	1	5	12	1	0	0	0	0	0	1	11	4	20	1	15	21	31	5	18	0	36	1	58.3333	13.8889	50	0
3	0	1	0	10	1	15	0	5	4	7	0	0	0	0	0	7	15	22	5	0	37	5	20	22	26	0	42	1	11.9048	52.381	61.9048	0
4	0	1	0	4	2	1	0	1	8	1	0	0	0	0	0	1	5	2	10	0	7	10	15	2	7	0	17	1	58.8235	11.7647	41.1765	0
5	0	1	0	1	22	0	1	1	7	0	0	0	0	0	0	0	2	0	29	1	2	30	31	1	24	0	32	1	93.75	3.125	75	0
6	0	1	0	9	44	9	15	36	90	2	4	0	0	0	0	6	45	11	134	19	56	153	179	30	77	0	209	1	73.2057	14.3541	36.8421	0
7	0	1	0	13	42	2	3	2	18	0	0	0	0	0	0	0	15	2	60	3	17	63	75	5	60	0	80	1	78.75	6.25	75	0
8	0	1	0	15	59	8	1	2	15	3	1	0	0	0	0	4	17	11	74	2	28	76	91	13	83	0	104	1	73.0769	12.5	79.8077	0
9	0	1	0	0	51	4	14	4	29	1	3	0	0	0	0	4	4	5	80	17	9	97	84	22	69	0	106	1	91.5094	20.7547	65.0943	0
10	0	1	0	15	64	62	4	4	27	11	3	0	0	0	0	14	19	73	91	7	92	98	110	80	145	0	190	1	51.5789	42.1053	76.3158	0
11	0	1	0	3	107	1	0	0	41	0	0	0	0	0	0	0	3	1	148	0	4	148	151	1	111	0	152	1	97.3684	0.657895	73.0263	0
12	0	1	0	0	157	0	2	2	135	2	2	0	0	0	0	4	2	2	292	4	4	296	294	6	159	0	300	1	98.6667	2	53	0
13	0	1	0	15	43	1	2	6	27	1	0	0	0	0	0	1	21	2	70	2	23	72	91	4	61	0	95	1	75.7895	4.21053	64.2105	0
14	0	1	0	5	59	10	2	15	48	14	0	0	0	0	0	14	20	24	107	2	44	109	127	26	76	0	153	1	71.2418	16.9935	49.6732	0
15	0	1	0	33	42	2	2	0	46	0	0	0	0	0	0	0	33	2	88	2	35	90	121	4	79	0	125	1	72	3.2	63.2	0
16	0	1	0	16	86	7	7	2	56	1	8	0	0	0	0	9	18	8	142	15	26	157	160	23	116	0	183	1	85.7923	12.5683	63.388	0
17	0	1	0	50	30	6	0	5	13	3	0	0	0	0	0	3	55	9	43	0	64	43	98	9	86	0	107	1	40.1869	8.41121	80.3738	0
18	0	1	0	19	71	4	1	2	14	0	0	0	0	0	0	0	21	4	85	1	25	86	106	5	95	0	111	1	77.4775	4.5045	85.5856	0
19	0	1	0	23	101	7	1	3	19	0	1	0	0	0	0	1	26	7	120	2	33	122	146	9	132	0	155	1	78.7097	5.80645	85.1613	0
20	0	1	0	5	85	0	7	0	50	2	4	0	0	0	0	6	5	2	135	11	7	146	140	13	97	0	153	1	95.4248	8.49673	63.3987	0
21	0	1	0	3	55	1	1	2	10	0	4	0	0	0	0	4	5	1	65	5	6	70	70	6	60	0	76	1	92.1053	7.89474	78.9474	0
22	0	1	0	1	33	1	4	0	11	2	1	0	0	0	0	3	1	3	44	5	4	49	45	8	39	0	53	1	92.4528	15.0943	73.5849	0
23	0	1	0	5	68	3	4	0	15	0	1	0	0	0	0	1	5	3	83	5	8	88	88	8	80	0	96	1	91.6667	8.33333	83.3333	0
24	0	1	0	7	98	0	6	0	25	0	0	0	0	0	0	0	7	0	123	6	7	129	130	6	111	0	136	1	94.8529	4.41176	81.6176	0
25	0	1	0	15	22	5	0	2	4	2	0	0	0	0	0	2	17	7	26	0	24	26	43	7	42	0	50	1	52	14	84	0
26	0	1	0	29	64	3	3	4	9	1	0	0	0	0	0	1	33	4	73	3	37	76	106	7	99	0	113	1	67.2566	6.19469	87.6106	0
27	0	1	0	0	39	1	1	1	6	0	1	0	0	0	0	1	1	1	45	2	2	47	46	3	41	0	49	1	95.9184	6.12245	83.6735	0
28	0	1	0	8	90	2	3	9	21	0	3	0	0	0	0	3	17	2	111	6	19	117	128	8	103	0	136	1	86.0294	5.88235	75.7353	0
29	0	1	0	0	33	0	13	2	28	0	1	0	0	0	0	1	2	0	61	14	2	75	63	14	46	0	77	1	97.4026	18.1818	59.7403	0
30	0	1	0	8	78	1	8	10	29	2	1	0	0	0	0	3	18	3	107	9	21	116	125	12	95	0	137	1	84.6715	8.75912	69.3431	0
31	0	1	0	14	46	7	11	19	13	2	0	0	0	0	0	2	33	9	59	11	42	70	92	20	78	0	112	1	62.5	17.8571	69.6429	0
32	0	1	0	0	27	0	5	0	20	0	0	0	0	0	0	0	0	0	47	5	0	52	47	5	32	0	52	1	100	9.61538	61.5385	0
33	0	1	0	0	61	1	5	0	13	0	0	0	0	0	0	0	0	1	74	5	1	79	74	6	67	0	80	1	98.75	7.5	83.75	0
34	0	1	0	22	49	1	11	0	16	0	1	0	0	0	0	1	22	1	65	12	23	77	87	13	83	0	100	1	77	13	83	0
35	0	1	0	43	36	12	1	18	2	5	0	0	0	0	0	5	61	17	38	1	78	39	99	18	92	0	117	1	33.3333	15.3846	78.6325	0
36	0	1	0	0	38	0	0	0	6	1	1	0	0	0	0	2	0	1	44	1	1	45	44	2	38	0	46	1	97.8261	4.34783	82.6087	0
37	0	1	0	0	20	0	1	1	1	0	0	0	0	0	0	0	1	0	21	1	1	22	22	1	21	0	23	1	95.6522	4.34783	91.3043	0
38	0	1	0	0	22	0	2	0	4	0	0	0	0	0	0	0	0	0	26	2	0	28	26	2	24	0	28	1	100	7.14286	85.7143	0
39	0	1	0	0	16	1	2	1	10	0	0	0	0	0	0	0	1	1	26	2	2	28	27	3	19	0	30	1	93.3333	10	63.3333	0
40	0	1	0	3	69	3	1	0	16	0	0	0	0	0	0	0	3	3	85	1	6	86	88	4	76	0	92	1	93.4783	4.34783	82.6087	0
41	0	1	0	1	48	0	3	0	14	0	0	0	0	0	0	0	1	0	62	3	1	65	63	3	52	0	66	1	98.4848	4.54545	78.7879	0
42	0	1	0	0	33	0	1	0	6	0	0	0	0	0	0	0	0	0	39	1	0	40	39	1	34	0	40	1	100	2.5	85	0
43	0	1	0	0	12	0	0	0	7	0	0	0	0	0	0	0	0	0	19	0	0	19	19	0	12	0	19	1	100	0	63.1579	0
44	0	1	0	0	32	0	5	0	13	0	1	0	0	0	0	1	0	0	45	6	0	51	45	6	37	0	51	1	100	11.7647	72.549	0
45	0	1	0	0	30	0	2	0	9	0	0	0	0	0	0	0	0	0	39	2	0	41	39	2	32	0	41	1	100	4.87805	78.0488	0
46	0	1	0	0	13	0	1	0	15	0	1	0	0	0	0	1	0	0	28	2	0	30	28	2	14	0	30	1	100	6.66667	46.6667	0
47	0	1	0	2	11	0	0	0	4	0	0	0	0	0	0	0	2	0	15	0	2	15	17	0	13	0	17	1	88.2353	0	76.4706	0
48	0	1	0	3	13	0	1	1	6	0	1	0	0	0	0	1	4	0	19	2	4	21	23	2	17	0	25	1	84	8	68	0
49	0	1	0	0	11	0	7	0	11	0	0	0	0	0	0	0	0	0	22	7	0	29	22	7	18	0	29	1	100	24.1379	62.069	0
50	0	1	0	3	11	0	2	0	3	0	1	0	0	0	0	1	3	0	14	3	3	17	17	3	16	0	20	1	85	15	80	0
51	0	1	0	2	6	0	6	1	12	0	0	0	0	0	0	0	3	0	18	6	3	24	21	6	14	0	27	1	88.8889	22.2222	51.8519	0
52	0	1	0	3	15	0	2	0	12	0	0	0	0	0	0	0	3	0	27	2	3	29	30	2	20	0	32	1	90.625	6.25	62.5	0
53	0	1	0	5	9	1	3	2	6	0	0	0	0	0	0	0	7	1	15	3	8	18	22	4	18	0	26	1	69.2308	15.3846	69.2308	0
54	0	1	0	5	7	0	3	2	7	0	0	0	0	0	0	0	7	0	14	3	7	17	21	3	15	0	24	1	70.8333	12.5	62.5	0
55	0	1	0	0	14	0	5	1	6	0	0	0	0	0	0	0	1	0	20	5	1	25	21	5	19	0	26	1	96.1538	19.2308	73.0769	0
56	0	1	0	8	4	1	2	0	2	0	0	0	0	0	0	0	8	1	6	2	9	8	14	3	15	0	17	1	47.0588	17.6471	88.2353	0
57	0	1	0	0	6	0	3	0	7	0	0	0	0	0	0	0	0	0	13	3	0	16	13	3	9	0	16	1	100	18.75	56.25	0
58	0	1	0	0	7	1	3	1	2	0	0	0	0	0	0	0	1	1	9	3	2	12	10	4	11	0	14	1	85.7143	28.5714	78.5714	0
59	0	1	0	0	5	0	2	0	3	0	0	0	0	0	0	0	0	0	8	2	0	10	8	2	7	0	10	1	100	20	70	0
60	0	1	0	0	9	0	8	0	10	0	0	0	0	0	0	0	0	0	19	8	0	27	19	8	17	0	27	1	100	29.6296	62.963	0
61	0	1	0	1	5	0	0	0	1	0	0	0	0	0	0	0	1	0	6	0	1	6	7	0	6	0	7	1	85.7143	0	85.7143	0
62	0	1	0	0	7	1	2	1	2	0	0	0	0	0	0	0	1	1	9	2	2	11	10	3	10	0	13	1	84.6154	23.0769	76.9231	0
63	0	1	0	0	2	0	3	0	6	0	0	0	0	0	0	0	0	0	8	3	0	11	8	3	5	0	11	1	100	27.2727	45.4545	0
64	0	1	0	0	7	0	8	0	11	0	1	0	0	0	0	1	0	0	18	9	0	27	18	9	15	0	27	1	100	33.3333	55.5556	0
65	0	1	0	0	8	1	6	1	8	0	0	0	0	0	0	0	1	1	16	6	2	22	17	7	15	0	24	1	91.6667	29.1667	62.5	0
66	0	1	0	0	21	1	2	1	4	0	0	0	0	0	0	0	1	1	25	2	2	27	26	3	24	0	29	1	93.1034	10.3448	82.7586	0
67	0	1	0	1	15	0	0	0	2	0	0	0	0	0	0	0	1	0	17	0	1	17	18	0	16	0	18	1	94.4444	0	88.8889	0
68	0	1	0	0	20	0	3	0	4	0	1	0	0	0	0	1	0	0	24	4	0	28	24	4	23	0	28	1	100	14.2857	82.1429	0
69	0	1	0	2	4	0	2	0	8	0	0	0	0	0	0	0	2	0	12	2	2	14	14	2	8	0	16	1	87.5	12.5	50	0
70	0	1	0	0	15	0	4	0	10	0	1	0	0	0	0	1	0	0	25	5	0	30	25	5	19	0	30	1	100	16.6667	63.3333	0
71	0	1	0	2	16	0	2	0	5	0	0	0	0	0	0	0	2	0	21	2	2	23	23	2	20	0	25	1	92	8	80	0
72	0	1	0	0	29	0	2	0	13	0	0	0	0	0	0	0	0	0	42	2	0	44	42	2	31	0	44	1	100	4.54545	70.4545	0
73	0	1	0	0	1	0	0	0	6	0	0	0	0	0	0	0	0	0	7	0	0	7	7	0	1	0	7	1	100	0	14.2857	0
74	0	1	0	0	15	1	1	1	8	0	0	0	0	0	0	0	1	1	23	1	2	24	24	2	17	0	26	1	92.3077	7.69231	65.3846	0
75	0	1	0	2	5	0	0	0	8	0	0	0	0	0	0	0	2	0	13	0	2	13	15	0	7	0	15	1	86.6667	0	46.6667	0
76	0	1	0	0	20	0	1	0	6	0	0	0	0	0	0	0	0	0	26	1	0	27	26	1	21	0	27	1	100	3.7037	77.7778	0
77	0	1	0	0	18	0	2	0	4	0	0	0	0	0	0	0	0	0	22	2	0	24	22	2	20	0	24	1	100	8.33333	83.3333	0
78	0	1	0	2	47	0	5	0	14	0	2	0	0	0	0	2	2	0	61	7	2	68	63	7	54	0	70	1	97.1429	10	77.1429	0
79	0	1	0	0	25	1	2	7	17	1	0	0	0	0	0	1	7	2	42	2	9	44	49	4	28	0	53	1	83.0189	7.54717	52.8302	0
80	0	1	0	0	21	0	3	0	21	0	0	0	0	0	0	0	0	0	42	3	0	45	42	3	24	0	45	1	100	6.66667	53.3333	0
81	0	1	0	1	10	0	0	0	6	0	0	0	0	0	0	0	1	0	16	0	1	16	17	0	11	0	17	1	94.1176	0	64.7059	0
82	0	1	0	0	2	0	1	0	10	0	0	0	0	0	0	0	0	0	12	1	0	13	12	1	3	0	13	1	100	7.69231	23.0769	0
83	0	1	0	0	8	0	0	0	6	0	0	0	0	0	0	0	0	0	14	0	0	14	14	0	8	0	14	1	100	0	57.1429	0
84	0	1	0	1	18	0	0	0	4	0	0	0	0	0	0	0	1	0	22	0	1	22	23	0	19	0	23	1	95.6522	0	82.6087	0
85	0	1	0	0	10	0	1	0	5	0	0	0	0	0	0	0	0	0	15	1	0	16	15	1	11	0	16	1	100	6.25	68.75	0
86	0	1	0	0	10	0	3	0	8	0	1	0	0	0	0	1	0	0	18	4	0	22	18	4	13	0	22	1	100	18.1818	59.0909	0
87	0	1	0	0	1	0	1	0	2	0	0	0	0	0	0	0	0	0	3	1	0	4	3	1	2	0	4	1	100	25	50	0
88	0	1	0	2	28	1	3	1	40	0	1	0	0	0	0	1	3	1	68	4	4	72	71	5	34	0	76	1	94.7368	6.57895	44.7368	0
89	0	1	0	0	25	0	6	0	21	0	0	0	0	0	0	0	0	0	46	6	0	52	46	6	31	0	52	1	100	11.5385	59.6154	0
90	0	1	0	0	14	0	3	1	12	0	0	0	0	0	0	0	1	0	26	3	1	29	27	3	17	0	30	1	96.6667	10	56.6667	0
91	0	1	0	0	59	0	7	0	39	0	0	0	0	0	0	0	0	0	98	7	0	105	98	7	66	0	105	1	100	6.66667	62.8571	0
92	0	1	0	0	9	0	0	1	4	1	0	0	0	0	0	1	1	1	13	0	2	13	14	1	9	0	15	1	86.6667	6.66667	60	0
93	0	1	0	0	2	0	8	1	21	0	0	0	0	0	0	0	1	0	23	8	1	31	24	8	10	0	32	1	96.875	25	31.25	0
94	0	1	0	0	12	1	3	0	15	0	1	0	0	0	0	1	0	1	27	4	1	31	27	5	16	0	32	1	96.875	15.625	50	0
95	0	1	0	1	7	1	5	0	17	1	0	0	0	0	0	1	1	2	24	5	3	29	25	7	14	0	32	1	90.625	21.875	43.75	0
96	0	1	0	0	6	1	6	1	5	2	0	0	0	0	0	2	1	3	11	6	4	17	12	9	13	0	21	1	80.9524	42.8571	61.9048	0
97	0	1	0	1	30	0	2	0	5	0	3	0	0	0	0	3	1	0	35	5	1	40	36	5	33	0	41	1	97.561	12.1951	80.4878	0
98	0	1	0	0	25	0	5	0	12	0	0	0	0	0	0	0	0	0	37	5	0	42	37	5	30	0	42	1	100	11.9048	71.4286	0
99	0	1	0	0	22	0	1	0	16	0	0	0	0	0	0	0	0	0	38	1	0	39	38	1	23	0	39	1	100	2.5641	58.9744	0
100	0	1	0	7	23	0	5	2	16	0	2	0	0	0	0	2	9	0	39	7	9	46	48	7	35	0	55	1	83.6364	12.7273	63.6364	0
101	0	1	0	2	26	0	2	4	19	0	0	0	0	0	0	0	6	0	45	2	6	47	51	2	30	0	53	1	88.6792	3.77358	56.6038	0
102	0	1	0	0	14	0	10	0	44	0	0	0	0	0	0	0	0	0	58	10	0	68	58	10	24	0	68	1	100	14.7059	35.2941	0
103	0	1	0	1	24	1	2	3	10	2	0	0	0	0	0	2	4	3	34	2	7	36	38	5	28	0	43	1	83.7209	11.6279	65.1163	0
104	0	1	0	0	24	0	0	0	5	0	2	0	0	0	0	2	0	0	29	2	0	31	29	2	24	0	31	1	100	6.45161	77.4194	0
105	0	1	0	21	8	4	6	32	15	0	0	0	0	0	0	0	53	4	23	6	57	29	76	10	39	0	86	1	33.7209	11.6279	45.3488	0
106	0	1	0	13	45	0	10	3	22	0	0	0	0	0	0	0	16	0	67	10	16	77	83	10	68	0	93	1	82.7957	10.7527	73.1183	0
107	0	1	0	9	6	0	2	4	10	0	0	0	0	0	0	0	13	0	16	2	13	18	29	2	17	0	31	1	58.0645	6.45161	54.8387	0
108	0	1	0	0	20	0	2	0	10	0	0	0	0	0	0	0	0	0	30	2	0	32	30	2	22	0	32	1	100	6.25	68.75	0
109	0	1	0	0	32	0	3	0	12	0	0	0	0	0	0	0	0	0	44	3	0	47	44	3	35	0	47	1	100	6.38298	74.4681	0
110	0	1	0	1	16	0	1	0	11	0	0	0	0	0	0	0	1	0	27	1	1	28	28	1	18	0	29	1	96.5517	3.44828	62.069	0
111	0	1	0	0	13	0	4	6	23	0	0	0	0	0	0	0	6	0	36	4	6	40	42	4	17	0	46	1	86.9565	8.69565	36.9565	0
112	0	1	0	0	12	0	1	0	11	0	0	0	0	0	0	0	0	0	23	1	0	24	23	1	13	0	24	1	100	4.16667	54.1667	0
113	0	1	0	0	19	0	5	0	21	0	0	0	0	0	0	0	0	0	40	5	0	45	40	5	24	0	45	1	100	11.1111	53.3333	0
114	0	1	0	0	14	0	15	0	22	0	0	0	0	0	0	0	0	0	36	15	0	51	36	15	29	0	51	1	100	29.4118	56.8627	0
115	0	1	0	0	6	4	6	4	8	0	0	0	0	0	0	0	4	4	14	6	8	20	18	10	16	0	28	1	71.4286	35.7143	57.1429	0
116	0	1	0	3	14	7	3	11	7	0	0	0	0	0	0	0	14	7	21	3	21	24	35	10	27	0	45	1	53.3333	22.2222	60	0
117	0	1	0	0	27	2	14	2	20	0	0	0	0	0	0	0	2	2	47	14	4	61	49	16	43	0	65	1	93.8462	24.6154	66.1538	0
118	0	1	0	4	15	10	9	3	16	2	0	0	0	0	0	2	7	12	31	9	19	40	38	21	38	0	59	1	67.7966	35.5932	64.4068	0
119	0	1	0	0	26	0	12	0	35	0	1	0	0	0	0	1	0	0	61	13	0	74	61	13	38	0	74	1	100	17.5676	51.3514	0
120	0	1	0	0	29	0	11	0	27	1	1	0	0	0	0	2	0	1	56	12	1	68	56	13	40	0	69	1	98.5507	18.8406	57.971	0
121	0	1	0	0	17	0	7	0	26	0	0	0	0	0	0	0	0	0	43	7	0	50	43	7	24	0	50	1	100	14	48	0
1	0	2	0	0	5	15	2	1	1	2	0	0	0	0	0	2	1	17	6	2	18	8	7	19	22	0	26	1	30.7692	73.0769	84.6154	0
2	0	2	0	0	9	2	1	0	3	1	0	0	0	0	0	1	0	3	12	1	3	13	12	4	12	0	16	1	81.25	25	75	0
3	0	2	0	12	7	21	10	6	12	3	1	0	0	0	0	4	18	24	19	11	42	30	37	35	50	0	72	1	41.6667	48.6111	69.4444	0
4	0	2	0	0	1	24	1	11	6	8	1	0	0	0	0	9	11	32	7	2	43	9	18	34	26	0	52	1	17.3077	65.3846	50	0
5	0	2	0	0	1	3	4	2	4	4	0	0	0	0	0	4	2	7	5	4	9	9	7	11	8	0	18	1	50	61.1111	44.4444	0
6	0	2	0	0	2	0	11	0	13	1	7	0	0	0	0	8	0	1	15	18	1	33	15	19	13	0	34	1	97.0588	55.8824	38.2353	0
7	0	2	0	0	0	2	48	1	48	4	3	0	0	0	0	7	1	6	48	51	7	99	49	57	50	0	106	1	93.3962	53.7736	47.1698	0
8	0	2	0	5	10	7	11	2	10	3	0	0	0	0	0	3	7	10	20	11	17	31	27	21	33	0	48	1	64.5833	43.75	68.75	0
9	0	2	0	6	8	6	3	0	0	3	4	0	0	0	0	7	6	9	8	7	15	15	14	16	23	0	30	1	50	53.3333	76.6667	0
10	0	2	0	2	20	5	15	0	10	1	8	0	0	0	0	9	2	6	30	23	8	53	32	29	42	0	61	1	86.8852	47.541	68.8525	0
11	0	2	0	50	30	29	24	0	18	14	11	0	0	0	0	25	50	43	48	35	93	83	98	78	133	0	176	1	47.1591	44.3182	75.5682	0
12	0	2	0	0	2	0	9	0	10	0	3	0	0	0	0	3	0	0	12	12	0	24	12	12	11	0	24	1	100	50	45.8333	0
13	0	2	0	2	30	1	59	1	62	1	14	0	0	0	0	15	3	2	92	73	5	165	95	75	92	0	170	1	97.0588	44.1176	54.1176	0
14	0	2	0	49	14	33	9	17	6	21	2	0	0	0	0	23	66	54	20	11	120	31	86	65	105	0	151	1	20.5298	43.0464	69.5364	0
15	0	2	0	14	0	32	32	14	17	5	15	0	0	0	0	20	28	37	17	47	65	64	45	84	78	0	129	1	49.6124	65.1163	60.4651	0
16	0	2	0	3	10	2	2	3	16	2	0	0	0	0	0	2	6	4	26	2	10	28	32	6	17	0	38	1	73.6842	15.7895	44.7368	0
17	0	2	0	2	23	2	43	2	42	1	2	0	0	0	0	3	4	3	65	45	7	110	69	48	70	0	117	1	94.0171	41.0256	59.8291	0
18	0	2	0	7	16	5	10	1	9	1	0	0	0	0	0	1	8	6	25	10	14	35	33	16	38	0	49	1	71.4286	32.6531	77.551	0
19	0	2	0	0	62	20	32	2	19	2	7	0	0	0	0	9	2	22	81	39	24	120	83	61	114	0	144	1	83.3333	42.3611	79.1667	0
20	0	2	0	2	45	1	3	0	12	0	3	0	0	0	0	3	2	1	57	6	3	63	59	7	51	0	66	1	95.4545	10.6061	77.2727	0
21	0	2	0	0	60	2	19	2	23	1	2	0	0	0	0	3	2	3	83	21	5	104	85	24	81	0	109	1	95.4128	22.0183	74.3119	0
22	0	2	0	0	47	1	10	0	13	2	3	0	0	0	0	5	0	3	60	13	3	73	60	16	58	0	76	1	96.0526	21.0526	76.3158	0
23	0	2	0	1	11	0	11	0	8	1	4	0	0	0	0	5	1	1	19	15	2	34	20	16	23	0	36	1	94.4444	44.4444	63.8889	0
24	0	2	0	1	36	0	10	0	10	1	0	0	0	0	0	1	1	1	46	10	2	56	47	11	47	0	58	1	96.5517	18.9655	81.0345	0
25	0	2	0	3	79	0	27	0	39	0	3	0	0	0	0	3	3	0	118	30	3	148	121	30	109	0	151	1	98.0132	19.8675	72.1854	0
26	0	2	0	0	32	1	4	0	3	0	4	0	0	0	0	4	0	1	35	8	1	43	35	9	37	0	44	1	97.7273	20.4545	84.0909	0
27	0	2	0	0	24	1	8	0	6	1	1	0	0	0	0	2	0	2	30	9	2	39	30	11	33	0	41	1	95.122	26.8293	80.4878	0
28	0	2	0	0	32	0	8	0	5	1	1	0	0	0	0	2	0	1	37	9	1	46	37	10	40	0	47	1	97.8723	21.2766	85.1064	0
29	0	2	0	0	10	0	16	0	15	0	1	0	0	0	0	1	0	0	25	17	0	42	25	17	26	0	42	1	100	40.4762	61.9048	0
30	0	2	0	0	34	2	9	0	19	2	4	0	0	0	0	6	0	4	53	13	4	66	53	17	45	0	70	1	94.2857	24.2857	64.2857	0
31	0	2	0	0	54	4	21	3	22	1	5	0	0	0	0	6	3	5	76	26	8	102	79	31	79	0	110	1	92.7273	28.1818	71.8182	0
32	0	2	0	0	15	2	0	0	4	0	0	0	0	0	0	0	0	2	19	0	2	19	19	2	17	0	21	1	90.4762	9.52381	80.9524	0
33	0	2	0	1	14	0	3	0	5	2	2	0	0	0	0	4	1	2	19	5	3	24	20	7	18	0	27	1	88.8889	25.9259	66.6667	0
34	0	2	0	0	28	0	10	0	12	0	1	0	0	0	0	1	0	0	40	11	0	51	40	11	38	0	51	1	100	21.5686	74.5098	0
35	0	2	0	10	2	14	16	1	12	7	1	0	0	0	0	8	11	21	14	17	32	31	25	38	42	0	63	1	49.2063	60.3175	66.6667	0
36	0	2	0	0	11	3	7	3	10	2	0	0	0	0	0	2	3	5	21	7	8	28	24	12	21	0	36	1	77.7778	33.3333	58.3333	0
37	0	2	0	0	17	5	9	1	7	0	1	0	0	0	0	1	1	5	24	10	6	34	25	15	31	0	40	1	85	37.5	77.5	0
38	0	2	0	0	7	0	1	0	0	0	0	0	0	0	0	0	0	0	7	1	0	8	7	1	8	0	8	1	100	12.5	100	0
39	0	2	0	0	15	1	5	0	4	0	3	0	0	0	0	3	0	1	19	8	1	27	19	9	21	0	28	1	96.4286	32.1429	75	0
40	0	2	0	0	18	5	4	0	3	5	0	0	0	0	0	5	0	10	21	4	10	25	21	14	27	0	35	1	71.4286	40	77.1429	0
41	0	2	0	0	20	1	5	1	24	3	3	0	0	0	0	6	1	4	44	8	5	52	45	12	26	0	57	1	91.2281	21.0526	45.614	0
42	0	2	0	0	15	0	6	0	6	1	3	0	0	0	0	4	0	1	21	9	1	30	21	10	21	0	31	1	96.7742	32.2581	67.7419	0
43	0	2	0	0	11	0	11	0	14	0	2	0	0	0	0	2	0	0	25	13	0	38	25	13	22	0	38	1	100	34.2105	57.8947	0
44	0	2	0	0	8	0	4	0	4	0	0	0	0	0	0	0	0	0	12	4	0	16	12	4	12	0	16	1	100	25	75	0
45	0	2	0	0	23	2	11	3	8	0	2	0	0	0	0	2	3	2	31	13	5	44	34	15	36	0	49	1	89.7959	30.6122	73.4694	0
46	0	2	0	3	7	0	5	0	5	0	0	0	0	0	0	0	3	0	12	5	3	17	15	5	15	0	20	1	85	25	75	0
47	0	2	0	4	8	0	2	0	3	0	0	0	0	0	0	0	4	0	11	2	4	13	15	2	14	0	17	1	76.4706	11.7647	82.3529	0
48	0	2	0	0	12	0	0	0	1	0	3	0	0	0	0	3	0	0	13	3	0	16	13	3	12	0	16	1	100	18.75	75	0
49	0	2	0	0	2	0	3	0	2	0	2	0	0	0	0	2	0	0	4	5	0	9	4	5	5	0	9	1	100	55.5556	55.5556	0
50	0	2	0	1	9	0	1	0	1	0	0	0	0	0	0	0	1	0	10	1	1	11	11	1	11	0	12	1	91.6667	8.33333	91.6667	0
51	0	2	0	0	4	0	25	0	24	0	0	0	0	0	0	0	0	0	28	25	0	53	28	25	29	0	53	1	100	47.1698	54.717	0
52	0	2	0	3	1	0	3	0	3	0	0	0	0	0	0	0	3	0	4	3	3	7	7	3	7	0	10	1	70	30	70	0
53	0	2	0	1	3	1	3	1	2	0	1	0	0	0	0	1	2	1	5	4	3	9	7	5	8	0	12	1	75	41.6667	66.6667	0
54	0	2	0	0	4	1	6	1	10	0	0	0	0	0	0	0	1	1	14	6	2	20	15	7	11	0	22	1	90.9091	31.8182	50	0
55	0	2	0	2	5	0	3	1	3	0	0	0	0	0	0	0	3	0	8	3	3	11	11	3	10	0	14	1	78.5714	21.4286	71.4286	0
56	0	2	0	0	8	1	3	0	5	0	1	0	0	0	0	1	0	1	13	4	1	17	13	5	12	0	18	1	94.4444	27.7778	66.6667	0
57	0	2	0	2	1	1	2	2	2	0	0	0	0	0	0	0	4	1	3	2	5	5	7	3	6	0	10	1	50	30	60	0
58	0	2	0	0	0	0	2	0	2	0	0	0	0	0	0	0	0	0	2	2	0	4	2	2	2	0	4	1	100	50	50	0
59	0	2	0	0	0	0	4	0	5	0	0	0	0	0	0	0	0	0	5	4	0	9	5	4	4	0	9	1	100	44.4444	44.4444	0
60	0	2	0	1	0	0	1	0	2	0	0	0	0	0	0	0	1	0	2	1	1	3	3	1	2	0	4	1	75	25	50	0
61	0	2	0	0	3	0	4	0	4	0	2	0	0	0	0	2	0	0	7	6	0	13	7	6	7	0	13	1	100	46.1538	53.8462	0
62	0	2	0	0	1	0	5	0	4	0	0	0	0	0	0	0	0	0	5	5	0	10	5	5	6	0	10	1	100	50	60	0
63	0	2	0	0	0	0	3	0	3	0	0	0	0	0	0	0	0	0	3	3	0	6	3	3	3	0	6	1	100	50	50	0
64	0	2	0	0	3	0	11	0	10	0	0	0	0	0	0	0	0	0	13	11	0	24	13	11	14	0	24	1	100	45.8333	58.3333	0
65	0	2	0	0	0	0	10	0	10	1	2	0	0	0	0	3	0	1	10	12	1	22	10	13	10	0	23	1	95.6522	56.5217	43.4783	0
66	0	2	0	0	4	0	4	0	4	0	0	0	0	0	0	0	0	0	8	4	0	12	8	4	8	0	12	1	100	33.3333	66.6667	0
67	0	2	0	0	6	1	1	1	2	0	0	0	0	0	0	0	1	1	8	1	2	9	9	2	8	0	11	1	81.8182	18.1818	72.7273	0
68	0	2	0	0	15	1	0	1	2	0	0	0	0	0	0	0	1	1	17	0	2	17	18	1	16	0	19	1	89.4737	5.26316	84.2105	0
69	0	2	0	0	5	0	3	0	3	0	4	0	0	0	0	4	0	0	8	7	0	15	8	7	8	0	15	1	100	46.6667	53.3333	0
70	0	2	0	1	5	1	4	0	11	0	2	0	0	0	0	2	1	1	16	6	2	22	17	7	11	0	24	1	91.6667	29.1667	45.8333	0
71	0	2	0	0	12	1	11	0	11	1	2	0	0	0	0	3	0	2	23	13	2	36	23	15	24	0	38	1	94.7368	39.4737	63.1579	0
72	0	2	0	6	10	4	4	5	5	0	1	0	0	0	0	1	11	4	15	5	15	20	26	9	24	0	35	1	57.1429	25.7143	68.5714	0
73	0	2	0	3	4	2	6	1	8	1	3	0	0	0	0	4	4	3	12	9	7	21	16	12	15	0	28	1	75	42.8571	53.5714	0
74	0	2	0	0	2	1	0	1	2	0	0	0	0	0	0	0	1	1	4	0	2	4	5	1	3	0	6	1	66.6667	16.6667	50	0
75	0	2	0	0	0	0	0	0	2	0	0	0	0	0	0	0	0	0	2	0	0	2	2	0	0	0	2	1	100	0	0	0
76	0	2	0	0	12	0	6	0	10	0	0	0	0	0	0	0	0	0	22	6	0	28	22	6	18	0	28	1	100	21.4286	64.2857	0
77	0	2	0	0	9	0	4	0	4	0	0	0	0	0	0	0	0	0	13	4	0	17	13	4	13	0	17	1	100	23.5294	76.4706	0
78	0	2	0	0	1	0	0	0	2	0	0	0	0	0	0	0	0	0	3	0	0	3	3	0	1	0	3	1	100	0	33.3333	0
79	0	2	0	0	4	0	25	0	26	1	1	0	0	0	0	2	0	1	30	26	1	56	30	27	29	0	57	1	98.2456	47.3684	50.8772	0
80	0	2	0	0	7	0	9	0	8	0	0	0	0	0	0	0	0	0	15	9	0	24	15	9	16	0	24	1	100	37.5	66.6667	0
81	0	2	0	0	14	0	15	0	14	0	0	0	0	0	0	0	0	0	28	15	0	43	28	15	29	0	43	1	100	34.8837	67.4419	0
82	0	2	0	0	0	1	5	1	5	0	1	0	0	0	0	1	1	1	5	6	2	11	6	7	6	0	13	1	84.6154	53.8462	46.1538	0
83	0	2	0	0	1	0	0	0	1	0	1	0	0	0	0	1	0	0	2	1	0	3	2	1	1	0	3	1	100	33.3333	33.3333	0
84	0	2	0	0	14	0	4	1	8	0	2	0	0	0	0	2	1	0	22	6	1	28	23	6	18	0	29	1	96.5517	20.6897	62.069	0
85	0	2	0	1	2	1	1	1	5	0	0	0	0	0	0	0	2	1	7	1	3	8	9	2	5	0	11	1	72.7273	18.1818	45.4545	0
86	0	2	0	1	1	0	6	0	8	0	0	0	0	0	0	0	1	0	9	6	1	15	10	6	8	0	16	1	93.75	37.5	50	0
87	0	2	0	0	1	0	6	0	5	0	0	0	0	0	0	0	0	0	6	6	0	12	6	6	7	0	12	1	100	50	58.3333	0
88	0	2	0	1	1	4	13	3	20	0	0	0	0	0	0	0	4	4	21	13	8	34	25	17	19	0	42	1	80.9524	40.4762	45.2381	0
89	0	2	0	0	11	1	18	1	18	0	3	0	0	0	0	3	1	1	29	21	2	50	30	22	30	0	52	1	96.1538	42.3077	57.6923	0
90	0	2	0	0	3	1	20	1	18	3	5	0	0	0	0	8	1	4	21	25	5	46	22	29	24	0	51	1	90.1961	56.8627	47.0588	0
91	0	2	0	0	7	0	9	0	12	1	0	0	0	0	0	1	0	1	19	9	1	28	19	10	16	0	29	1	96.5517	34.4828	55.1724	0
92	0	2	0	0	17	0	27	7	35	0	6	0	0	0	0	6	7	0	52	33	7	85	59	33	44	0	92	1	92.3913	35.8696	47.8261	0
93	0	2	0	0	3	1	14	1	15	0	0	0	0	0	0	0	1	1	18	14	2	32	19	15	18	0	34	1	94.1176	44.1176	52.9412	0
94	0	2	0	0	1	0	15	0	20	0	3	0	0	0	0	3	0	0	21	18	0	39	21	18	16	0	39	1	100	46.1538	41.0256	0
95	0	2	0	0	5	3	2	3	4	2	0	0	0	0	0	2	3	5	9	2	8	11	12	7	10	0	19	1	57.8947	36.8421	52.6316	0
96	0	2	0	0	15	0	14	0	18	0	1	0	0	0	0	1	0	0	33	15	0	48	33	15	29	0	48	1	100	31.25	60.4167	0
97	0	2	0	3	8	0	9	0	15	0	1	0	0	0	0	1	3	0	23	10	3	33	26	10	20	0	36	1	91.6667	27.7778	55.5556	0
98	0	2	0	0	13	0	3	0	10	0	0	0	0	0	0	0	0	0	23	3	0	26	23	3	16	0	26	1	100	11.5385	61.5385	0
99	0	2	0	0	6	0	2	0	4	0	0	0	0	0	0	0	0	0	10	2	0	12	10	2	8	0	12	1	100	16.6667	66.6667	0
100	0	2	0	0	15	0	20	0	22	0	2	0	0	0	0	2	0	0	37	22	0	59	37	22	35	0	59	1	100	37.2881	59.322	0
101	0	2	0	0	13	0	9	0	9	1	1	0	0	0	0	2	0	1	22	10	1	32	22	11	22	0	33	1	96.9697	33.3333	66.6667	0
102	0	2	0	0	0	0	19	0	21	0	0	0	0	0	0	0	0	0	21	19	0	40	21	19	19	0	40	1	100	47.5	47.5	0
103	0	2	0	0	11	0	31	0	64	0	0	0	0	0	0	0	0	0	75	31	0	106	75	31	42	0	106	1	100	29.2453	39.6226	0
104	0	2	0	5	20	1	9	1	11	0	0	0	0	0	0	0	6	1	31	9	7	40	37	10	35	0	47	1	85.1064	21.2766	74.4681	0
105	0	2	0	3	4	0	2	0	2	0	1	0	0	0	0	1	3	0	6	3	3	9	9	3	9	0	12	1	75	25	75	0
106	0	2	0	9	28	9	9	12	11	1	1	0	0	0	0	2	21	10	39	10	31	49	60	20	55	0	80	1	61.25	25	68.75	0
107	0	2	0	2	15	0	14	0	21	0	0	0	0	0	0	0	2	0	36	14	2	50	38	14	31	0	52	1	96.1538	26.9231	59.6154	0
108	0	2	0	0	19	0	9	0	13	0	1	0	0	0	0	1	0	0	32	10	0	42	32	10	28	0	42	1	100	23.8095	66.6667	0
109	0	2	0	0	15	0	3	0	5	1	0	0	0	0	0	1	0	1	20	3	1	23	20	4	18	0	24	1	95.8333	16.6667	75	0
110	0	2	0	0	3	0	7	0	7	0	1	0	0	0	0	1	0	0	10	8	0	18	10	8	10	0	18	1	100	44.4444	55.5556	0
111	0	2	0	0	2	0	11	0	12	0	0	0	0	0	0	0	0	0	14	11	0	25	14	11	13	0	25	1	100	44	52	0
112	0	2	0	2	2	3	11	4	14	0	1	0	0	0	0	1	6	3	16	12	9	28	22	15	18	0	37	1	75.6757	40.5405	48.6486	0
113	0	2	0	0	2	1	5	1	7	0	3	0	0	0	0	3	1	1	9	8	2	17	10	9	8	0	19	1	89.4737	47.3684	42.1053	0
114	0	2	0	0	14	1	33	0	34	0	4	0	0	0	0	4	0	1	48	37	1	85	48	38	48	0	86	1	98.8372	44.186	55.814	0
115	0	2	0	0	6	4	8	1	8	0	0	0	0	0	0	0	1	4	14	8	5	22	15	12	18	0	27	1	81.4815	44.4444	66.6667	0
116	0	2	0	0	0	6	17	6	16	1	0	0	0	0	0	1	6	7	16	17	13	33	22	24	23	0	46	1	71.7391	52.1739	50	0
117	0	2	0	0	3	0	14	0	18	0	0	0	0	0	0	0	0	0	21	14	0	35	21	14	17	0	35	1	100	40	48.5714	0
118	0	2	0	0	28	0	25	0	21	0	4	0	0	0	0	4	0	0	49	29	0	78	49	29	53	0	78	1	100	37.1795	67.9487	0
119	0	2	0	0	7	0	7	0	7	0	0	0	0	0	0	0	0	0	14	7	0	21	14	7	14	0	21	1	100	33.3333	66.6667	0
120	0	2	0	0	12	0	12	0	13	0	0	0	0	0	0	0	0	0	25	12	0	37	25	12	24	0	37	1	100	32.4324	64.8649	0
121	0	2	0	0	15	7	8	5	12	1	1	0	0	0	0	2	5	8	27	9	13	36	32	17	30	0	49	1	73.4694	34.6939	61.2245	0
1	0	3	0	1	0	3	0	0	0	0	1	0	0	0	0	1	1	3	0	1	4	1	1	4	4	0	5	1	20	80	80	0
2	0	3	0	0	7	12	2	3	5	7	0	0	0	0	0	7	3	19	12	2	22	14	15	21	21	0	36	1	38.8889	58.3333	58.3333	0
3	0	3	0	4	1	9	2	3	8	5	0	0	0	0	0	5	7	14	9	2	21	11	16	16	16	0	32	1	34.375	50	50	0
4	0	3	0	1	3	17	5	3	7	12	0	0	0	0	0	12	4	29	10	5	33	15	14	34	26	0	48	1	31.25	70.8333	54.1667	0
5	0	3	0	1	0	23	6	4	5	4	1	0	0	0	0	5	5	27	5	7	32	12	10	34	30	0	44	1	27.2727	77.2727	68.1818	0
6	0	3	0	0	1	1	39	1	30	1	12	0	0	0	0	13	1	2	31	51	3	82	32	53	41	0	85	1	96.4706	62.3529	48.2353	0
7	0	3	0	0	0	7	15	3	15	4	10	0	0	0	0	14	3	11	15	25	14	40	18	36	22	0	54	1	74.0741	66.6667	40.7407	0
8	0	3	0	0	7	1	51	0	55	0	3	0	0	0	0	3	0	1	62	54	1	116	62	55	59	0	117	1	99.1453	47.0085	50.4274	0
9	0	3	0	3	5	3	5	2	5	0	0	0	0	0	0	0	5	3	10	5	8	15	15	8	16	0	23	1	65.2174	34.7826	69.5652	0
10	0	3	0	1	5	13	11	0	7	5	10	0	0	0	0	15	1	18	12	21	19	33	13	39	30	0	52	1	63.4615	75	57.6923	0
11	0	3	0	2	10	8	14	0	23	3	5	0	0	0	0	8	2	11	33	19	13	52	35	30	34	0	65	1	80	46.1538	52.3077	0
12	0	3	0	0	6	113	49	19	38	54	46	0	0	0	0	100	19	167	44	95	186	139	63	262	168	0	325	1	42.7692	80.6154	51.6923	0
13	0	3	0	8	3	25	34	2	33	1	10	0	0	0	0	11	10	26	36	44	36	80	46	70	70	0	116	1	68.9655	60.3448	60.3448	0
14	0	3	0	7	5	10	60	0	57	5	31	0	0	0	0	36	7	15	62	91	22	153	69	106	82	0	175	1	87.4286	60.5714	46.8571	0
15	0	3	0	6	2	14	14	3	16	3	19	0	0	0	0	22	9	17	18	33	26	51	27	50	36	0	77	1	66.2338	64.9351	46.7532	0
16	0	3	0	0	16	25	25	8	63	17	7	0	0	0	0	24	8	42	79	32	50	111	87	74	66	0	161	1	68.9441	45.9627	40.9938	0
17	0	3	0	6	0	2	21	2	21	3	0	0	0	0	0	3	8	5	21	21	13	42	29	26	29	0	55	1	76.3636	47.2727	52.7273	0
18	0	3	0	2	9	0	49	0	73	0	4	0	0	0	0	4	2	0	82	53	2	135	84	53	60	0	137	1	98.5401	38.6861	43.7956	0
19	0	3	0	16	0	29	0	13	2	16	0	0	0	0	0	16	29	45	2	0	74	2	31	45	45	0	76	1	2.63158	59.2105	59.2105	0
20	0	3	0	1	90	2	23	2	24	3	3	0	0	0	0	6	3	5	114	26	8	140	117	31	116	0	148	1	94.5946	20.9459	78.3784	0
21	0	3	0	0	35	2	18	0	16	2	2	0	0	0	0	4	0	4	51	20	4	71	51	24	55	0	75	1	94.6667	32	73.3333	0
22	0	3	0	0	53	3	14	2	13	2	9	0	0	0	0	11	2	5	66	23	7	89	68	28	70	0	96	1	92.7083	29.1667	72.9167	0
23	0	3	0	30	0	5	12	0	14	5	7	0	0	0	0	12	30	10	14	19	40	33	44	29	47	0	73	1	45.2055	39.726	64.3836	0
24	0	3	0	4	10	12	7	1	1	3	3	0	0	0	0	6	5	15	11	10	20	21	16	25	33	0	41	1	51.2195	60.9756	80.4878	0
25	0	3	0	0	3	6	9	1	9	1	5	0	0	0	0	6	1	7	12	14	8	26	13	21	18	0	34	1	76.4706	61.7647	52.9412	0
26	0	3	0	0	48	0	18	0	13	2	8	0	0	0	0	10	0	2	61	26	2	87	61	28	66	0	89	1	97.7528	31.4607	74.1573	0
27	0	3	0	0	21	3	3	0	4	0	6	0	0	0	0	6	0	3	25	9	3	34	25	12	27	0	37	1	91.8919	32.4324	72.973	0
28	0	3	0	5	29	2	10	1	9	4	3	0	0	0	0	7	6	6	38	13	12	51	44	19	46	0	63	1	80.9524	30.1587	73.0159	0
29	0	3	0	1	9	0	8	0	8	0	1	0	0	0	0	1	1	0	17	9	1	26	18	9	18	0	27	1	96.2963	33.3333	66.6667	0
30	0	3	0	0	19	2	17	1	14	0	10	0	0	0	0	10	1	2	33	27	3	60	34	29	38	0	63	1	95.2381	46.0317	60.3175	0
31	0	3	0	6	20	7	9	3	8	2	1	0	0	0	0	3	9	9	28	10	18	38	37	19	42	0	56	1	67.8571	33.9286	75	0
32	0	3	0	0	40	0	22	0	20	2	6	0	0	0	0	8	0	2	60	28	2	88	60	30	62	0	90	1	97.7778	33.3333	68.8889	0
33	0	3	0	0	6	2	2	2	2	1	2	0	0	0	0	3	2	3	8	4	5	12	10	7	10	0	17	1	70.5882	41.1765	58.8235	0
34	0	3	0	2	0	3	2	4	1	5	1	0	0	0	0	6	6	8	1	3	14	4	7	11	7	0	18	1	22.2222	61.1111	38.8889	0
35	0	3	0	1	6	12	13	5	12	13	2	0	0	0	0	15	6	25	18	15	31	33	24	40	32	0	64	1	51.5625	62.5	50	0
36	0	3	0	0	12	1	31	1	30	1	5	0	0	0	0	6	1	2	42	36	3	78	43	38	44	0	81	1	96.2963	46.9136	54.321	0
37	0	3	0	0	15	0	4	0	5	0	3	0	0	0	0	3	0	0	20	7	0	27	20	7	19	0	27	1	100	25.9259	70.3704	0
38	0	3	0	0	16	8	6	6	5	0	0	0	0	0	0	0	6	8	21	6	14	27	27	14	30	0	41	1	65.8537	34.1463	73.1707	0
39	0	3	0	6	1	0	4	0	2	1	1	0	0	0	0	2	6	1	3	5	7	8	9	6	11	0	15	1	53.3333	40	73.3333	0
40	0	3	0	0	19	2	11	0	9	1	5	0	0	0	0	6	0	3	28	16	3	44	28	19	32	0	47	1	93.617	40.4255	68.0851	0
41	0	3	0	0	25	0	8	0	7	1	4	0	0	0	0	5	0	1	32	12	1	44	32	13	33	0	45	1	97.7778	28.8889	73.3333	0
42	0	3	0	0	1	0	17	0	26	0	0	0	0	0	0	0	0	0	27	17	0	44	27	17	18	0	44	1	100	38.6364	40.9091	0
43	0	3	0	0	4	0	1	0	3	1	0	0	0	0	0	1	0	1	7	1	1	8	7	2	5	0	9	1	88.8889	22.2222	55.5556	0
44	0	3	0	0	1	0	10	0	11	0	0	0	0	0	0	0	0	0	12	10	0	22	12	10	11	0	22	1	100	45.4545	50	0
45	0	3	0	0	19	6	11	4	9	0	0	0	0	0	0	0	4	6	28	11	10	39	32	17	36	0	49	1	79.5918	34.6939	73.4694	0
46	0	3	0	0	13	0	11	0	8	0	0	0	0	0	0	0	0	0	21	11	0	32	21	11	24	0	32	1	100	34.375	75	0
47	0	3	0	1	4	0	5	0	5	0	0	0	0	0	0	0	1	0	9	5	1	14	10	5	10	0	15	1	93.3333	33.3333	66.6667	0
48	0	3	0	0	2	0	4	0	4	0	0	0	0	0	0	0	0	0	6	4	0	10	6	4	6	0	10	1	100	40	60	0
49	0	3	0	1	2	0	3	0	3	0	2	0	0	0	0	2	1	0	5	5	1	10	6	5	6	0	11	1	90.9091	45.4545	54.5455	0
50	0	3	0	0	0	2	3	0	1	0	3	0	0	0	0	3	0	2	1	6	2	7	1	8	5	0	9	1	77.7778	88.8889	55.5556	0
51	0	3	0	0	0	0	1	0	1	0	2	0	0	0	0	2	0	0	1	3	0	4	1	3	1	0	4	1	100	75	25	0
52	0	3	0	0	0	1	8	0	7	1	1	0	0	0	0	2	0	2	7	9	2	16	7	11	9	0	18	1	88.8889	61.1111	50	0
53	0	3	0	0	0	0	2	0	2	0	0	0	0	0	0	0	0	0	2	2	0	4	2	2	2	0	4	1	100	50	50	0
54	0	3	0	0	6	1	5	0	6	0	1	0	0	0	0	1	0	1	12	6	1	18	12	7	12	0	19	1	94.7368	36.8421	63.1579	0
55	0	3	0	2	0	2	1	1	1	2	0	0	0	0	0	2	3	4	1	1	7	2	4	5	5	0	9	1	22.2222	55.5556	55.5556	0
56	0	3	0	0	12	0	4	0	4	0	1	0	0	0	0	1	0	0	16	5	0	21	16	5	16	0	21	1	100	23.8095	76.1905	0
57	0	3	0	0	1	0	1	0	1	0	1	0	0	0	0	1	0	0	2	2	0	4	2	2	2	0	4	1	100	50	50	0
58	0	3	0	0	0	0	3	0	2	0	1	0	0	0	0	1	0	0	2	4	0	6	2	4	3	0	6	1	100	66.6667	50	0
59	0	3	0	0	0	0	7	0	7	0	0	0	0	0	0	0	0	0	7	7	0	14	7	7	7	0	14	1	100	50	50	0
60	0	3	0	0	0	0	7	0	3	0	4	0	0	0	0	4	0	0	3	11	0	14	3	11	7	0	14	1	100	78.5714	50	0
61	0	3	0	0	0	0	2	0	2	0	0	0	0	0	0	0	0	0	2	2	0	4	2	2	2	0	4	1	100	50	50	0
62	0	3	0	0	0	0	4	0	3	0	0	0	0	0	0	0	0	0	3	4	0	7	3	4	4	0	7	1	100	57.1429	57.1429	0
63	0	3	0	0	1	2	3	1	2	1	0	0	0	0	0	1	1	3	3	3	4	6	4	6	6	0	10	1	60	60	60	0
64	0	3	0	0	0	0	6	0	6	0	0	0	0	0	0	0	0	0	6	6	0	12	6	6	6	0	12	1	100	50	50	0
65	0	3	0	0	0	0	4	0	3	2	1	0	0	0	0	3	0	2	3	5	2	8	3	7	4	0	10	1	80	70	40	0
66	0	3	0	0	2	0	4	0	4	0	1	0	0	0	0	1	0	0	6	5	0	11	6	5	6	0	11	1	100	45.4545	54.5455	0
67	0	3	0	0	15	0	4	0	5	1	0	0	0	0	0	1	0	1	20	4	1	24	20	5	19	0	25	1	96	20	76	0
68	0	3	0	0	0	1	4	1	2	0	0	0	0	0	0	0	1	1	2	4	2	6	3	5	5	0	8	1	75	62.5	62.5	0
69	0	3	0	0	1	0	7	0	7	0	1	0	0	0	0	1	0	0	8	8	0	16	8	8	8	0	16	1	100	50	50	0
70	0	3	0	0	5	0	2	0	3	0	3	0	0	0	0	3	0	0	8	5	0	13	8	5	7	0	13	1	100	38.4615	53.8462	0
71	0	3	0	0	5	0	3	0	5	0	1	0	0	0	0	1	0	0	10	4	0	14	10	4	8	0	14	1	100	28.5714	57.1429	0
72	0	3	0	0	6	0	15	0	16	0	1	0	0	0	0	1	0	0	22	16	0	38	22	16	21	0	38	1	100	42.1053	55.2632	0
73	0	3	0	0	1	0	7	0	7	0	3	0	0	0	0	3	0	0	8	10	0	18	8	10	8	0	18	1	100	55.5556	44.4444	0
74	0	3	0	1	0	0	13	0	10	0	0	0	0	0	0	0	1	0	10	13	1	23	11	13	14	0	24	1	95.8333	54.1667	58.3333	0
75	0	3	0	0	3	2	11	2	11	1	0	0	0	0	0	1	2	3	14	11	5	25	16	14	16	0	30	1	83.3333	46.6667	53.3333	0
76	0	3	0	0	0	0	9	0	5	1	3	0	0	0	0	4	0	1	5	12	1	17	5	13	9	0	18	1	94.4444	72.2222	50	0
77	0	3	0	1	6	0	4	0	4	0	1	0	0	0	0	1	1	0	10	5	1	15	11	5	11	0	16	1	93.75	31.25	68.75	0
78	0	3	0	2	8	1	1	1	1	1	1	0	0	0	0	2	3	2	9	2	5	11	12	4	12	0	16	1	68.75	25	75	0
79	0	3	0	2	10	1	1	1	1	1	1	0	0	0	0	2	3	2	11	2	5	13	14	4	14	0	18	1	72.2222	22.2222	77.7778	0
80	0	3	0	0	3	2	14	1	16	0	1	0	0	0	0	1	1	2	19	15	3	34	20	17	19	0	37	1	91.8919	45.9459	51.3514	0
81	0	3	0	0	0	2	13	1	12	1	1	0	0	0	0	2	1	3	12	14	4	26	13	17	15	0	30	1	86.6667	56.6667	50	0
82	0	3	0	0	0	0	13	0	15	0	2	0	0	0	0	2	0	0	15	15	0	30	15	15	13	0	30	1	100	50	43.3333	0
83	0	3	0	0	0	1	2	1	2	0	0	0	0	0	0	0	1	1	2	2	2	4	3	3	3	0	6	1	66.6667	50	50	0
84	0	3	0	1	2	0	1	0	2	0	1	0	0	0	0	1	1	0	4	2	1	6	5	2	4	0	7	1	85.7143	28.5714	57.1429	0
85	0	3	0	0	13	0	8	0	8	0	0	0	0	0	0	0	0	0	21	8	0	29	21	8	21	0	29	1	100	27.5862	72.4138	0
86	0	3	0	0	1	0	3	0	4	0	2	0	0	0	0	2	0	0	5	5	0	10	5	5	4	0	10	1	100	50	40	0
87	0	3	0	0	0	1	5	1	5	0	0	0	0	0	0	0	1	1	5	5	2	10	6	6	6	0	12	1	83.3333	50	50	0
88	0	3	0	0	0	8	14	2	14	1	0	0	0	0	0	1	2	9	14	14	11	28	16	23	22	0	39	1	71.7949	58.9744	56.4103	0
89	0	3	0	0	0	1	6	0	6	0	0	0	0	0	0	0	0	1	6	6	1	12	6	7	7	0	13	1	92.3077	53.8462	53.8462	0
90	0	3	0	0	3	1	29	1	19	0	4	0	0	0	0	4	1	1	22	33	2	55	23	34	33	0	57	1	96.4912	59.6491	57.8947	0
91	0	3	0	0	3	0	19	0	19	0	2	0	0	0	0	2	0	0	22	21	0	43	22	21	22	0	43	1	100	48.8372	51.1628	0
92	0	3	0	0	0	4	11	1	9	1	2	0	0	0	0	3	1	5	9	13	6	22	10	18	15	0	28	1	78.5714	64.2857	53.5714	0
93	0	3	0	0	2	0	25	0	23	0	2	0	0	0	0	2	0	0	25	27	0	52	25	27	27	0	52	1	100	51.9231	51.9231	0
94	0	3	0	0	3	1	5	1	6	0	1	0	0	0	0	1	1	1	9	6	2	15	10	7	9	0	17	1	88.2353	41.1765	52.9412	0
95	0	3	0	0	1	0	8	0	8	1	5	0	0	0	0	6	0	1	9	13	1	22	9	14	9	0	23	1	95.6522	60.8696	39.1304	0
96	0	3	0	0	4	1	4	0	7	0	0	0	0	0	0	0	0	1	11	4	1	15	11	5	9	0	16	1	93.75	31.25	56.25	0
97	0	3	0	0	4	0	14	0	13	0	2	0	0	0	0	2	0	0	17	16	0	33	17	16	18	0	33	1	100	48.4848	54.5455	0
98	0	3	0	0	10	0	8	0	9	0	0	0	0	0	0	0	0	0	19	8	0	27	19	8	18	0	27	1	100	29.6296	66.6667	0
99	0	3	0	0	11	0	3	0	1	2	4	0	0	0	0	6	0	2	12	7	2	19	12	9	14	0	21	1	90.4762	42.8571	66.6667	0
100	0	3	0	0	16	0	11	0	11	0	3	0	0	0	0	3	0	0	27	14	0	41	27	14	27	0	41	1	100	34.1463	65.8537	0
101	0	3	0	0	3	1	2	0	4	0	0	0	0	0	0	0	0	1	7	2	1	9	7	3	6	0	10	1	90	30	60	0
102	0	3	0	0	1	0	9	0	10	0	1	0	0	0	0	1	0	0	11	10	0	21	11	10	10	0	21	1	100	47.619	47.619	0
103	0	3	0	0	1	2	20	0	16	0	0	0	0	0	0	0	0	2	17	20	2	37	17	22	23	0	39	1	94.8718	56.4103	58.9744	0
104	0	3	0	0	0	0	25	0	21	1	4	0	0	0	0	5	0	1	21	29	1	50	21	30	25	0	51	1	98.0392	58.8235	49.0196	0
105	0	3	0	0	4	2	13	1	9	0	0	0	0	0	0	0	1	2	13	13	3	26	14	15	19	0	29	1	89.6552	51.7241	65.5172	0
106	0	3	0	0	4	0	12	0	14	0	2	0	0	0	0	2	0	0	18	14	0	32	18	14	16	0	32	1	100	43.75	50	0
107	0	3	0	0	1	1	3	2	2	0	0	0	0	0	0	0	2	1	3	3	3	6	5	4	5	0	9	1	66.6667	44.4444	55.5556	0
108	0	3	0	0	3	0	14	0	16	0	0	0	0	0	0	0	0	0	19	14	0	33	19	14	17	0	33	1	100	42.4242	51.5152	0
109	0	3	0	0	12	0	5	0	6	0	0	0	0	0	0	0	0	0	18	5	0	23	18	5	17	0	23	1	100	21.7391	73.913	0
110	0	3	0	0	3	0	6	0	6	0	0	0	0	0	0	0	0	0	9	6	0	15	9	6	9	0	15	1	100	40	60	0
111	0	3	0	0	8	0	14	0	14	0	0	0	0	0	0	0	0	0	22	14	0	36	22	14	22	0	36	1	100	38.8889	61.1111	0
112	0	3	0	0	8	0	5	0	5	1	4	0	0	0	0	5	0	1	13	9	1	22	13	10	13	0	23	1	95.6522	43.4783	56.5217	0
113	0	3	0	0	1	0	19	0	24	0	0	0	0	0	0	0	0	0	25	19	0	44	25	19	20	0	44	1	100	43.1818	45.4545	0
114	0	3	0	0	2	1	11	0	8	1	2	0	0	0	0	3	0	2	10	13	2	23	10	15	14	0	25	1	92	60	56	0
115	0	3	0	0	1	3	34	3	31	0	3	0	0	0	0	3	3	3	32	37	6	69	35	40	38	0	75	1	92	53.3333	50.6667	0
116	0	3	0	0	1	0	6	0	6	0	0	0	0	0	0	0	0	0	7	6	0	13	7	6	7	0	13	1	100	46.1538	53.8462	0
117	0	3	0	0	0	0	10	0	11	0	0	0	0	0	0	0	0	0	11	10	0	21	11	10	10	0	21	1	100	47.619	47.619	0
118	0	3	0	0	0	0	10	0	8	1	2	0	0	0	0	3	0	1	8	12	1	20	8	13	10	0	21	1	95.2381	61.9048	47.619	0
119	0	3	0	0	2	0	8	0	8	0	1	0	0	0	0	1	0	0	10	9	0	19	10	9	10	0	19	1	100	47.3684	52.6316	0
120	0	3	0	0	2	1	14	1	11	0	0	0	0	0	0	0	1	1	13	14	2	27	14	15	17	0	29	1	93.1034	51.7241	58.6207	0
121	0	3	0	0	2	12	18	9	12	1	2	0	0	0	0	3	9	13	14	20	22	34	23	33	32	0	56	1	60.7143	58.9286	57.1429	0
1	0	4	0	0	0	0	23	0	23	0	0	0	0	0	0	0	0	0	23	23	0	46	23	23	23	0	46	1	100	50	50	0
2	0	4	0	0	0	0	6	0	6	2	0	0	0	0	2	0	0	6	8	0	14	6	8	6	0	14	14	1	100	57.1429	42.8571	0
3	0	4	0	0	0	1	11	0	11	0	0	0	0	0	0	0	0	1	11	11	1	22	11	12	12	0	23	1	95.6522	52.1739	52.1739	0
4	0	4	0	0	0	1	9	0	9	0	0	0	0	0	1	0	2	9	9	2	18	9	11	10	0	20	20	1	90	55	50	0
5	0	4	0	0	0	2	37	1	39	4	3	0	0	0	0	7	1	6	39	40	7	79	40	46	39	0	86	1	91.8605	53.4884	45.3488	0
6	0	4	0	0	0	1	4	1	4	0	0	0	0	0	2	1	3	4	4	4	8	5	7	5	0	12	12	1	66.6667	58.3333	41.6667	0
7	0	4	0	0	1	0	8	0	8	0	0	0	0	0	0	0	0	0	9	8	0	17	9	8	9	0	17	1	100	47.0588	52.9412	0
8	0	4	0	0	0	1	10	0	10	1	0	0	0	0	2	0	2	10	11	2	21	10	13	11	0	23	23	1	91.3043	56.5217	47.8261	0
9	0	4	0	0	1	0	26	0	26	1	9	0	0	0	0	10	0	1	27	35	1	62	27	36	27	0	63	1	98.4127	57.1429	42.8571	0
10	0	4	0	0	0	0	12	0	10	5	0	0	0	0	6	0	1	10	17	1	27	10	18	12	0	28	28	1	96.4286	64.2857	42.8571	0
11	0	4	0	0	0	1	14	0	14	0	3	0	0	0	0	3	0	1	14	17	1	31	14	18	15	0	32	1	96.875	56.25	46.875	0
12	0	4	0	0	0	0	77	0	74	7	0	0	0	0	7	0	0	74	84	0	158	74	84	77	0	158	158	1	100	53.1646	48.7342	0
13	0	4	0	0	0	2	10	2	11	0	0	0	0	0	0	0	2	2	11	10	4	21	13	12	12	0	25	1	84	48	48	0
14	0	4	0	0	1	0	7	0	7	0	0	0	0	0	0	0	0	8	7	0	15	8	7	8	0	15	15	1	100	46.6667	53.3333	0
15	0	4	0	0	2	19	19	18	14	2	1	0	0	0	0	3	18	21	16	20	39	36	34	41	40	0	75	1	48	54.6667	53.3333	0
16	0	4	0	0	0	2	2	0	40	16	0	0	0	0	16	0	2	40	18	2	58	40	20	4	0	60	60	1	96.6667	33.3333	6.66667	0
17	0	4	0	3	0	20	8	19	8	15	0	0	0	0	0	15	22	35	8	8	57	16	30	43	31	0	73	1	21.9178	58.9041	42.4658	0
18	0	4	0	0	7	2	45	1	43	12	0	0	0	0	13	1	3	50	57	4	107	51	60	54	0	111	111	1	96.3964	54.0541	48.6486	0
19	0	4	0	0	0	1	37	1	37	0	0	0	0	0	0	0	1	1	37	37	2	74	38	38	38	0	76	1	97.3684	50	50	0
20	0	4	0	0	0	1	66	1	69	9	0	0	0	0	9	1	1	69	75	2	144	70	76	67	0	146	146	1	98.6301	52.0548	45.8904	0
21	0	4	0	0	0	1	9	1	9	6	6	0	0	0	0	12	1	7	9	15	8	24	10	22	10	0	32	1	75	68.75	31.25	0
22	0	4	0	0	0	1	8	1	8	0	0	0	0	0	0	1	1	8	8	2	16	9	9	9	0	18	18	1	88.8889	50	50	0
23	0	4	0	0	0	2	40	1	40	0	3	0	0	0	0	3	1	2	40	43	3	83	41	45	42	0	86	1	96.5116	52.3256	48.8372	0
24	0	4	0	0	0	0	2	0	5	0	0	0	0	0	0	0	0	5	2	0	7	5	2	2	0	7	7	1	100	28.5714	28.5714	0
25	0	4	0	0	0	1	14	1	13	0	0	0	0	0	0	0	1	1	13	14	2	27	14	15	15	0	29	1	93.1034	51.7241	51.7241	0
26	0	4	0	0	0	1	33	1	35	1	0	0	0	0	1	1	1	35	34	2	69	36	35	34	0	71	71	1	97.1831	49.2958	47.8873	0
27	0	4	0	0	2	0	32	0	32	1	1	0	0	0	0	2	0	1	34	33	1	67	34	34	34	0	68	1	98.5294	50	50	0
28	0	4	0	0	0	1	30	1	30	2	0	0	0	0	7	1	6	30	32	7	62	31	38	31	0	69	69	1	89.8551	55.0725	44.9275	0
29	0	4	0	0	0	1	30	5	12	0	0	0	0	0	0	0	5	1	12	30	6	42	17	31	31	0	48	1	87.5	64.5833	64.5833	0
30	0	4	0	0	0	0	37	0	33	9	0	0	0	0	9	0	0	33	46	0	79	33	46	37	0	79	79	1	100	58.2278	46.8354	0
31	0	4	0	0	0	2	28	0	28	1	6	0	0	0	0	7	0	3	28	34	3	62	28	37	30	0	65	1	95.3846	56.9231	46.1538	0
32	0	4	0	0	0	7	23	6	21	6	0	0	0	0	10	6	11	21	29	17	50	27	40	30	0	67	67	1	74.6269	59.7015	44.7761	0
33	0	4	0	0	0	1	33	1	33	0	0	0	0	0	0	0	1	1	33	33	2	66	34	34	34	0	68	1	97.0588	50	50	0
34	0	4	0	0	3	0	60	0	60	6	0	0	0	0	7	0	1	63	66	1	129	63	67	63	0	130	130	1	99.2308	51.5385	48.4615	0
35	0	4	0	0	1	0	13	0	15	0	0	0	0	0	0	0	0	0	16	13	0	29	16	13	14	0	29	1	100	44.8276	48.2759	0
36	0	4	0	0	2	2	11	2	11	1	0	0	0	0	1	2	2	13	12	4	25	15	14	15	0	29	29	1	86.2069	48.2759	51.7241	0
37	0	4	0	3	0	1	22	0	22	0	0	0	0	0	0	0	3	1	22	22	4	44	25	23	26	0	48	1	91.6667	47.9167	54.1667	0
38	0	4	0	0	3	4	86	3	92	7	0	0	0	0	10	3	7	95	93	10	188	98	100	93	0	198	198	1	94.9495	50.5051	46.9697	0
39	0	4	0	0	2	0	38	0	42	0	0	0	0	0	0	0	0	0	44	38	0	82	44	38	40	0	82	1	100	46.3415	48.7805	0
40	0	4	0	0	0	1	48	1	49	2	0	0	0	0	2	1	1	49	50	2	99	50	51	49	0	101	101	1	98.0198	50.495	48.5149	0
41	0	4	0	0	2	21	18	13	16	5	0	0	0	0	0	5	13	26	18	18	39	36	31	44	41	0	75	1	48	58.6667	54.6667	0
42	0	4	0	0	0	4	55	1	52	0	0	0	0	0	0	1	4	52	55	5	107	53	59	59	0	112	112	1	95.5357	52.6786	52.6786	0
43	0	4	0	0	0	2	39	2	35	2	3	0	0	0	0	5	2	4	35	42	6	77	37	46	41	0	83	1	92.7711	55.4217	49.3976	0
44	0	4	0	0	1	0	21	0	22	4	0	0	0	0	7	0	3	23	25	3	48	23	28	22	0	51	51	1	94.1176	54.902	43.1373	0
45	0	4	0	0	0	0	44	0	44	0	2	0	0	0	0	2	0	0	44	46	0	90	44	46	44	0	90	1	100	51.1111	48.8889	0
46	0	4	0	1	0	37	1	24	1	0	0	0	0	0	4	25	41	1	1	66	2	26	42	39	0	68	68	1	2.94118	61.7647	57.3529	0
47	0	4	0	0	1	1	8	1	7	1	3	0	0	0	0	4	1	2	8	11	3	19	9	13	10	0	22	1	86.3636	59.0909	45.4545	0
48	0	4	0	0	0	2	7	2	7	0	0	0	0	0	1	2	3	7	7	5	14	9	10	9	0	19	19	1	73.6842	52.6316	47.3684	0
49	0	4	0	0	0	0	21	0	22	0	0	0	0	0	0	0	0	0	22	21	0	43	22	21	21	0	43	1	100	48.8372	48.8372	0
50	0	4	0	0	3	0	17	0	24	0	0	0	0	0	0	0	0	27	17	0	44	27	17	20	0	44	44	1	100	38.6364	45.4545	0
51	0	4	0	0	2	1	11	1	11	0	0	0	0	0	0	0	1	1	13	11	2	24	14	12	14	0	26	1	92.3077	46.1538	53.8462	0
52	0	4	0	0	1	0	13	0	13	0	0	0	0	0	0	0	0	14	13	0	27	14	13	14	0	27	27	1	100	48.1481	51.8519	0
53	0	4	0	0	0	1	21	1	21	0	0	0	0	0	0	0	1	1	21	21	2	42	22	22	22	0	44	1	95.4545	50	50	0
54	0	4	0	0	0	0	34	0	32	0	0	0	0	0	0	0	0	32	34	0	66	32	34	34	0	66	66	1	100	51.5152	51.5152	0
55	0	4	0	0	0	2	15	2	15	0	0	0	0	0	0	0	2	2	15	15	4	30	17	17	17	0	34	1	88.2353	50	50	0
56	0	4	0	0	0	0	10	0	11	0	0	0	0	0	0	0	0	11	10	0	21	11	10	10	0	21	21	1	100	47.619	47.619	0
57	0	4	0	0	2	1	3	1	3	0	0	0	0	0	0	0	1	1	5	3	2	8	6	4	6	0	10	1	80	40	60	0
58	0	4	0	0	1	0	7	0	7	0	0	0	0	0	0	0	0	8	7	0	15	8	7	8	0	15	15	1	100	46.6667	53.3333	0
59	0	4	0	0	0	0	19	0	20	0	0	0	0	0	0	0	0	0	20	19	0	39	20	19	19	0	39	1	100	48.7179	48.7179	0
60	0	4	0	0	0	0	1	0	1	0	0	0	0	0	0	0	0	1	1	0	2	1	1	1	0	2	2	1	100	50	50	0
61	0	4	0	0	0	0	13	0	14	0	1	0	0	0	0	1	0	0	14	14	0	28	14	14	13	0	28	1	100	50	46.4286	0
62	0	4	0	0	0	0	13	0	14	0	0	0	0	0	0	0	0	14	13	0	27	14	13	13	0	27	27	1	100	48.1481	48.1481	0
63	0	4	0	0	0	0	4	0	3	0	0	0	0	0	0	0	0	0	3	4	0	7	3	4	4	0	7	1	100	57.1429	57.1429	0
64	0	4	0	0	0	0	11	0	11	0	0	0	0	0	0	0	0	11	11	0	22	11	11	11	0	22	22	1	100	50	50	0
65	0	4	0	0	1	25	1	22	1	0	0	0	0	0	0	0	22	25	2	1	47	3	24	26	27	0	50	1	6	52	54	0
66	0	4	0	0	0	1	10	1	10	0	0	0	0	0	0	1	1	10	10	2	20	11	11	11	0	22	22	1	90.9091	50	50	0
67	0	4	0	0	0	1	11	0	9	0	0	0	0	0	0	0	0	1	9	11	1	20	9	12	12	0	21	1	95.2381	57.1429	57.1429	0
68	0	4	0	0	0	0	8	0	8	4	0	0	0	0	4	0	0	8	12	0	20	8	12	8	0	20	20	1	100	60	40	0
69	0	4	0	0	0	0	1	0	1	0	0	0	0	0	0	0	0	0	1	1	0	2	1	1	1	0	2	1	100	50	50	0
70	0	4	0	0	0	0	6	0	10	0	0	0	0	0	1	0	1	10	6	1	16	10	7	6	0	17	17	1	94.1176	41.1765	35.2941	0
71	0	4	0	0	0	0	4	0	3	0	0	0	0	0	0	0	0	0	3	4	0	7	3	4	4	0	7	1	100	57.1429	57.1429	0
72	0	4	0	0	0	2	8	2	8	0	0	0	0	0	0	2	2	8	8	4	16	10	10	10	0	20	20	1	80	50	50	0
73	0	4	0	0	0	1	0	1	0	0	0	0	0	0	0	0	1	1	0	0	2	0	1	1	1	0	2	1	0	50	50	0
74	0	4	0	0	0	0	4	0	4	0	0	0	0	0	0	0	0	4	4	0	8	4	4	4	0	8	8	1	100	50	50	0
75	0	4	0	0	3	9	1	9	1	0	0	0	0	0	0	0	9	9	4	1	18	5	13	10	13	0	23	1	21.7391	43.4783	56.5217	0
76	0	4	0	0	0	4	5	4	5	0	0	0	0	0	0	4	4	5	5	8	10	9	9	9	0	18	18	1	55.5556	50	50	0
77	0	4	0	0	0	2	6	1	6	1	0	0	0	0	0	1	1	3	6	6	4	12	7	9	8	0	16	1	75	56.25	50	0
78	0	4	0	0	0	0	10	0	11	1	0	0	0	0	1	0	0	11	11	0	22	11	11	10	0	22	22	1	100	50	45.4545	0
79	0	4	0	0	0	0	11	0	11	0	0	0	0	0	0	0	0	0	11	11	0	22	11	11	11	0	22	1	100	50	50	0
80	0	4	0	3	0	1	4	3	4	0	0	0	0	0	2	6	3	4	4	9	8	10	7	8	0	17	17	1	47.0588	41.1765	47.0588	0
81	0	4	0	0	0	1	2	1	2	0	0	0	0	0	0	0	1	1	2	2	2	4	3	3	3	0	6	1	66.6667	50	50	0
82	0	4	0	0	2	0	12	0	12	0	0	0	0	0	0	0	0	14	12	0	26	14	12	14	0	26	26	1	100	46.1538	53.8462	0
83	0	4	0	1	0	0	7	0	7	0	0	0	0	0	0	0	1	0	7	7	1	14	8	7	8	0	15	1	93.3333	46.6667	53.3333	0
84	0	4	0	0	3	13	4	11	4	0	0	0	0	0	1	11	14	7	4	25	11	18	18	20	0	36	36	1	30.5556	50	55.5556	0
85	0	4	0	0	1	0	2	0	2	0	0	0	0	0	0	0	0	0	3	2	0	5	3	2	3	0	5	1	100	40	60	0
86	0	4	0	0	0	0	0	0	1	0	0	0	0	0	0	0	0	1	0	0	1	1	0	0	0	1	1	1	100	0	0	0
87	0	4	0	0	0	0	0	0	0	0	0	0	0	0	0	0	0	0	0	0	0	0	0	0	0	0	0	1	#DIV/0!	#DIV/0!	#DIV/0!	#DIV/0!
88	0	4	0	0	0	0	3	0	2	0	0	0	0	0	0	0	0	2	3	0	5	2	3	3	0	5	5	1	100	60	60	0
89	0	4	0	0	0	2	2	2	2	0	0	0	0	0	0	0	2	2	2	2	4	4	4	4	4	0	8	1	50	50	50	0
90	0	4	0	0	0	0	0	0	3	0	0	0	0	0	0	0	0	3	0	0	3	3	0	0	0	3	3	1	100	0	0	0
91	0	4	0	0	1	0	2	0	1	0	0	0	0	0	0	0	0	0	2	2	0	4	2	2	3	0	4	1	100	50	75	0
92	0	4	0	0	0	0	3	0	3	0	0	0	0	0	0	0	0	3	3	0	6	3	3	3	0	6	6	1	100	50	50	0
93	0	4	0	0	0	0	9	0	9	0	0	0	0	0	0	0	0	0	9	9	0	18	9	9	9	0	18	1	100	50	50	0
94	0	4	0	0	0	0	5	0	5	0	0	0	0	0	0	0	0	5	5	0	10	5	5	5	0	10	10	1	100	50	50	0
95	0	4	0	0	0	1	5	1	4	0	0	0	0	0	0	0	1	1	4	5	2	9	5	6	6	0	11	1	81.8182	54.5455	54.5455	0
96	0	4	0	0	1	0	0	0	0	0	0	0	0	0	0	0	0	1	0	0	1	1	0	1	0	1	1	1	100	0	100	0
97	0	4	0	0	0	0	2	0	2	1	0	0	0	0	0	1	0	1	2	2	1	4	2	3	2	0	5	1	80	60	40	0
98	0	4	0	0	0	0	0	0	0	0	0	0	0	0	0	0	0	0	0	0	0	0	0	0	0	0	0	1	#DIV/0!	#DIV/0!	#DIV/0!	#DIV/0!
99	0	4	0	0	0	0	1	0	1	0	0	0	0	0	0	0	0	0	1	1	0	2	1	1	1	0	2	1	100	50	50	0
100	0	4	0	0	1	0	6	0	6	0	0	0	0	0	0	0	0	7	6	0	13	7	6	7	0	13	13	1	100	46.1538	53.8462	0
101	0	4	0	0	0	0	4	0	4	0	0	0	0	0	0	0	0	0	4	4	0	8	4	4	4	0	8	1	100	50	50	0
102	0	4	0	0	0	0	1	0	1	0	0	0	0	0	0	0	0	1	1	0	2	1	1	1	0	2	2	1	100	50	50	0
103	0	4	0	0	0	0	5	0	5	0	0	0	0	0	0	0	0	0	5	5	0	10	5	5	5	0	10	1	100	50	50	0
104	0	4	0	0	0	0	1	0	1	0	0	0	0	0	0	0	0	1	1	0	2	1	1	1	0	2	2	1	100	50	50	0
105	0	4	0	0	0	1	0	2	0	0	0	0	0	0	0	0	2	1	0	0	3	0	2	1	1	0	3	1	0	33.3333	33.3333	0
106	0	4	0	0	0	0	1	0	1	0	0	0	0	0	0	0	0	1	1	0	2	1	1	1	0	2	2	1	100	50	50	0
107	0	4	0	0	0	0	1	0	1	0	0	0	0	0	0	0	0	0	1	1	0	2	1	1	1	0	2	1	100	50	50	0
108	0	4	0	0	1	2	3	2	4	0	0	0	0	0	0	2	2	5	3	4	8	7	5	6	0	12	12	1	66.6667	41.6667	50	0
109	0	4	0	0	0	1	3	1	3	0	1	0	0	0	0	1	1	1	3	4	2	7	4	5	4	0	9	1	77.7778	55.5556	44.4444	0
110	0	4	0	0	0	0	2	0	1	0	0	0	0	0	0	0	0	1	2	0	3	1	2	2	0	3	3	1	100	66.6667	66.6667	0
111	0	4	0	0	1	0	1	0	1	0	0	0	0	0	0	0	0	0	2	1	0	3	2	1	2	0	3	1	100	33.3333	66.6667	0
112	0	4	0	0	0	0	1	0	3	0	0	0	0	0	0	0	0	3	1	0	4	3	1	1	0	4	4	1	100	25	25	0
113	0	4	0	0	1	0	0	0	0	0	0	0	0	0	0	0	0	0	1	0	0	1	1	0	1	0	1	1	100	0	100	0
114	0	4	0	0	0	0	0	0	2	0	0	0	0	0	0	0	0	2	0	0	2	2	0	0	0	2	2	1	100	0	0	0
115	0	4	0	0	0	0	0	0	0	0	0	0	0	0	0	0	0	0	0	0	0	0	0	0	0	0	0	1	#DIV/0!	#DIV/0!	#DIV/0!	#DIV/0!
116	0	4	0	0	0	0	0	0	0	0	0	0	0	0	0	0	0	0	0	0	0	0	0	0	0	0	0	1	#DIV/0!	#DIV/0!	#DIV/0!	#DIV/0!
117	0	4	0	0	1	0	2	0	2	0	0	0	0	0	0	0	0	0	3	2	0	5	3	2	3	0	5	1	100	40	60	0
118	0	4	0	0	0	0	1	0	2	0	0	0	0	0	0	0	0	2	1	0	3	2	1	1	0	3	3	1	100	33.3333	33.3333	0
119	0	4	0	0	2	0	3	0	6	0	0	0	0	0	0	0	0	0	8	3	0	11	8	3	5	0	11	1	100	27.2727	45.4545	0
120	0	4	0	0	0	2	2	2	2	0	0	0	0	0	0	2	2	2	2	4	4	4	4	4	0	8	8	1	50	50	50	0
121	0	4	0	0	0	0	0	0	2	0	0	0	0	0	0	0	0	0	2	0	0	2	2	0	0	0	2	1	100	0	0	0
1	0	5	0	1	0	2	0	1	1	2	0	0	0	0	0	2	2	4	1	0	6	1	3	4	3	0	7	1	14.2857	57.1429	42.8571	0
2	0	5	0	2	0	2	0	1	0	0	1	0	0	0	0	1	3	0	0	1	5	1	3	3	4	0	6	1	16.6667	50	66.6667	0
3	0	5	0	10	9	23	1	5	3	2	0	0	0	0	0	2	15	25	12	1	40	13	27	26	43	0	53	1	24.5283	49.0566	81.1321	0
4	0	5	0	7	2	4	0	1	1	0	0	0	0	0	0	0	8	5	3	0	12	3	11	4	13	0	15	1	20	26.6667	86.6667	0
5	0	5	0	7	6	9	3	4	11	3	1	0	0	0	0	4	11	12	17	4	23	21	28	16	25	0	44	1	47.7273	36.3636	56.8182	0
6	0	5	0	29	42	32	3	0	13	7	0	0	0	0	0	7	29	17	55	3	68	58	84	42	106	0	126	1	46.0317	33.3333	84.127	0
7	0	5	0	2	3	0	5	7	8	11	2	0	0	0	0	13	9	11	11	7	20	18	20	18	10	0	38	1	47.3684	47.3684	26.3158	0
8	0	5	0	0	58	8	6	3	45	6	1	0	0	0	0	7	3	1	103	7	17	110	106	21	72	0	127	1	86.6142	16.5354	56.6929	0
9	0	5	0	2	0	0	13	0	39	0	1	0	0	0	0	1	2	0	39	14	2	53	41	14	15	0	55	1	96.3636	25.4545	27.2727	0
10	0	5	0	0	45	0	0	0	6	0	1	0	0	0	0	1	0	1	51	1	0	52	51	1	45	0	52	1	100	1.92308	86.5385	0
11	0	5	0	9	44	2	3	0	7	0	0	0	0	0	0	0	9	2	51	3	11	54	60	5	58	0	65	1	83.0769	7.69231	89.2308	0
12	0	5	0	11	61	4	9	4	37	5	1	0	0	0	0	6	15	1	98	10	24	108	113	19	85	0	132	1	81.8182	14.3939	64.3939	0
13	0	5	0	64	94	34	6	2	40	3	3	0	0	0	0	6	66	37	134	9	103	143	200	46	198	0	246	1	58.1301	18.6992	80.4878	0
14	0	5	0	9	26	3	3	4	27	3	1	0	0	0	0	4	13	1	53	4	19	57	66	10	41	0	76	1	75	13.1579	53.9474	0
15	0	5	0	3	37	2	2	2	45	0	8	0	0	0	0	8	5	2	82	10	7	92	87	12	44	0	99	1	92.9293	12.1212	44.4444	0
16	0	5	0	8	39	4	4	2	32	1	1	0	0	0	0	2	10	0	71	5	15	76	81	10	55	0	91	1	83.5165	10.989	60.4396	0
17	0	5	0	0	56	0	9	0	46	0	4	0	0	0	0	4	0	0	102	13	0	115	102	13	65	0	115	1	100	11.3043	56.5217	0
18	0	5	0	10	34	3	2	6	4	2	2	0	0	0	0	4	16	0	38	4	21	42	54	9	49	0	63	1	66.6667	14.2857	77.7778	0
19	0	5	0	2	21	6	4	0	5	0	0	0	0	0	0	0	2	6	26	4	8	30	28	10	33	0	38	1	78.9474	26.3158	86.8421	0
20	0	5	0	9	36	6	3	24	13	17	1	0	0	0	0	18	33	2	49	4	56	53	82	27	54	0	109	1	48.6239	24.7706	49.5413	0
21	0	5	0	1	40	1	4	0	6	0	2	0	0	0	0	2	1	1	46	6	2	52	47	7	46	0	54	1	96.2963	12.963	85.1852	0
22	0	5	0	0	32	0	2	0	8	0	0	0	0	0	0	0	0	0	40	2	0	42	40	2	34	0	42	1	100	4.7619	80.9524	0
23	0	5	0	1	54	0	2	0	11	0	0	0	0	0	0	0	1	0	65	2	1	67	66	2	57	0	68	1	98.5294	2.94118	83.8235	0
24	0	5	0	0	50	0	3	0	7	0	0	0	0	0	0	0	0	0	57	3	0	60	57	3	53	0	60	1	100	5	88.3333	0
25	0	5	0	3	34	2	5	2	11	0	0	0	0	0	0	0	5	2	45	5	7	50	50	7	44	0	57	1	87.7193	12.2807	77.193	0
26	0	5	0	0	9	0	2	0	18	0	0	0	0	0	0	0	0	0	27	2	0	29	27	2	11	0	29	1	100	6.89655	37.931	0
27	0	5	0	0	54	2	2	0	5	0	0	0	0	0	0	0	0	2	59	2	2	61	59	4	58	0	63	1	96.8254	6.34921	92.0635	0
28	0	5	0	1	24	0	1	0	3	0	0	0	0	0	0	0	1	1	27	1	1	28	28	1	26	0	29	1	96.5517	3.44828	89.6552	0
29	0	5	0	7	22	5	5	4	5	2	0	0	0	0	0	2	11	7	27	5	18	32	38	12	39	0	50	1	64	24	78	0
30	0	5	0	1	35	0	1	0	12	0	0	0	0	0	0	0	1	0	47	1	1	48	48	1	37	0	49	1	97.9592	2.04082	75.5102	0
31	0	5	0	5	109	0	4	0	4	0	0	0	0	0	0	0	5	0	113	4	5	117	118	4	118	0	122	1	95.9016	3.27869	96.7213	0
32	0	5	0	0	33	1	3	0	11	0	0	0	0	0	0	0	0	1	44	3	1	47	44	4	37	0	48	1	97.9167	8.33333	77.0833	0
33	0	5	0	9	28	5	6	5	0	0	0	0	0	0	0	0	14	5	28	6	19	34	42	11	48	0	53	1	64.1509	20.7547	90.566	0
34	0	5	0	1	20	0	4	0	13	0	0	0	0	0	0	0	1	0	33	4	1	37	34	4	25	0	38	1	97.3684	10.5263	65.7895	0
35	0	5	0	23	11	16	4	7	3	1	0	0	0	0	0	1	30	17	14	4	47	18	44	21	54	0	65	1	27.6923	32.3077	83.0769	0
36	0	5	0	3	9	1	9	1	12	0	1	0	0	0	0	1	4	0	21	10	5	31	25	11	22	0	36	1	86.1111	30.5556	61.1111	0
37	0	5	0	0	28	1	0	1	4	0	0	0	0	0	0	0	1	1	32	0	2	32	33	1	29	0	34	1	94.1176	2.94118	85.2941	0
38	0	5	0	0	5	1	3	2	4	0	0	0	0	0	0	0	2	0	9	3	3	12	11	4	9	0	15	1	80	26.6667	60	0
39	0	5	0	0	16	1	0	0	5	0	0	0	0	0	0	0	0	1	21	0	1	21	21	1	17	0	22	1	95.4545	4.54545	77.2727	0
40	0	5	0	0	35	2	10	0	20	0	0	0	0	0	0	0	0	0	55	10	2	65	55	12	47	0	67	1	97.0149	17.9104	70.1493	0
41	0	5	0	0	43	1	7	0	19	0	0	0	0	0	0	0	0	1	62	7	1	69	62	8	51	0	70	1	98.5714	11.4286	72.8571	0
42	0	5	0	0	10	0	8	0	8	0	0	0	0	0	0	0	0	0	18	8	0	26	18	8	18	0	26	1	100	30.7692	69.2308	0
43	0	5	0	0	16	0	2	0	13	1	0	0	0	0	0	1	0	1	29	2	1	31	29	3	18	0	32	1	96.875	9.375	56.25	0
44	0	5	0	1	6	2	0	0	1	3	1	0	0	0	0	4	1	0	7	1	6	8	8	6	9	0	14	1	57.1429	42.8571	64.2857	0
45	0	5	0	0	44	0	3	0	7	0	0	0	0	0	0	0	0	0	51	3	0	54	51	3	47	0	54	1	100	5.55556	87.037	0
46	0	5	0	1	14	0	1	0	10	0	0	0	0	0	0	0	1	0	24	1	1	25	25	1	16	0	26	1	96.1538	3.84615	61.5385	0
47	0	5	0	3	14	0	0	0	3	0	0	0	0	0	0	0	3	0	17	0	3	17	20	0	17	0	20	1	85	0	85	0
48	0	5	0	2	9	0	2	0	6	0	0	0	0	0	0	0	2	0	15	2	2	17	17	2	13	0	19	1	89.4737	10.5263	68.4211	0
49	0	5	0	0	10	1	5	2	5	1	1	0	0	0	0	2	2	2	15	6	4	21	17	8	16	0	25	1	84	32	64	0
50	0	5	0	4	7	0	1	1	1	0	0	0	0	0	0	0	5	0	8	1	5	9	13	1	12	0	14	1	64.2857	7.14286	85.7143	0
51	0	5	0	0	16	0	4	0	6	0	0	0	0	0	0	0	0	0	22	4	0	26	22	4	20	0	26	1	100	15.3846	76.9231	0
52	0	5	0	0	6	0	0	0	5	0	0	0	0	0	0	0	0	1	11	0	0	11	11	0	6	0	11	1	100	0	54.5455	0
53	0	5	0	0	14	0	0	1	2	0	0	0	0	0	0	0	1	0	16	0	1	16	17	0	14	0	17	1	94.1176	0	82.3529	0
54	0	5	0	2	5	1	1	3	2	0	0	0	0	0	0	0	5	0	7	1	6	8	12	2	9	0	14	1	57.1429	14.2857	64.2857	0
55	0	5	0	1	4	0	1	0	0	0	0	0	0	0	0	0	1	0	4	1	1	5	5	1	6	0	6	1	83.3333	16.6667	100	0
56	0	5	0	0	4	0	0	0	1	1	0	0	0	0	0	1	0	0	5	0	1	5	5	1	4	0	6	1	83.3333	16.6667	66.6667	0
57	0	5	0	0	2	0	2	0	2	1	0	0	0	0	0	1	0	1	4	2	1	6	4	3	4	0	7	1	85.7143	42.8571	57.1429	0
58	0	5	0	1	10	0	3	0	5	0	0	0	0	0	0	0	1	0	15	3	1	18	16	3	14	0	19	1	94.7368	15.7895	73.6842	0
59	0	5	0	0	8	0	0	1	1	0	0	0	0	0	0	0	1	0	9	0	1	9	10	0	8	0	10	1	90	0	80	0
60	0	5	0	0	4	0	2	2	3	0	0	0	0	0	0	0	2	1	7	2	2	9	9	2	6	0	11	1	81.8182	18.1818	54.5455	0
61	0	5	0	0	11	0	6	0	13	1	1	0	0	0	0	2	0	1	24	7	1	31	24	8	17	0	32	1	96.875	25	53.125	0
62	0	5	0	0	1	0	3	0	3	0	1	0	0	0	0	1	0	0	4	4	0	8	4	4	4	0	8	1	100	50	50	0
63	0	5	0	0	5	0	6	0	7	0	0	0	0	0	0	0	0	0	12	6	0	18	12	6	11	0	18	1	100	33.3333	61.1111	0
64	0	5	0	0	5	0	4	0	5	0	0	0	0	0	0	0	0	1	10	4	0	14	10	4	9	0	14	1	100	28.5714	64.2857	0
65	0	5	0	0	10	0	11	0	16	0	0	0	0	0	0	0	0	0	26	11	0	37	26	11	21	0	37	1	100	29.7297	56.7568	0
66	0	5	0	0	4	0	2	0	2	0	0	0	0	0	0	0	0	0	6	2	0	8	6	2	6	0	8	1	100	25	75	0
67	0	5	0	0	21	0	0	0	5	0	0	0	0	0	0	0	0	0	26	0	0	26	26	0	21	0	26	1	100	0	80.7692	0
68	0	5	0	3	12	0	0	0	2	0	0	0	0	0	0	0	3	0	14	0	3	14	17	0	15	0	17	1	82.3529	0	88.2353	0
69	0	5	0	3	15	0	0	0	2	0	0	0	0	0	0	0	3	0	17	0	3	17	20	0	18	0	20	1	85	0	90	0
70	0	5	0	1	5	1	2	0	4	0	2	0	0	0	0	2	1	0	9	4	2	13	10	5	9	0	15	1	86.6667	33.3333	60	0
71	0	5	0	0	17	0	1	0	5	0	1	0	0	0	0	1	0	0	22	2	0	24	22	2	18	0	24	1	100	8.33333	75	0
72	0	5	0	0	5	0	0	1	2	0	0	0	0	0	0	0	1	0	7	0	1	7	8	0	5	0	8	1	87.5	0	62.5	0
73	0	5	0	0	19	0	4	0	26	0	0	0	0	0	0	0	0	0	45	4	0	49	45	4	23	0	49	1	100	8.16327	46.9388	0
74	0	5	0	0	6	0	0	0	4	0	1	0	0	0	0	1	0	0	10	1	0	11	10	1	6	0	11	1	100	9.09091	54.5455	0
75	0	5	0	0	4	0	0	0	0	0	1	0	0	0	0	1	0	0	4	1	0	5	4	1	4	0	5	1	100	20	80	0
76	0	5	0	0	3	0	2	0	3	0	0	0	0	0	0	0	0	1	6	2	0	8	6	2	5	0	8	1	100	25	62.5	0
77	0	5	0	2	8	0	1	0	2	0	0	0	0	0	0	0	2	0	10	1	2	11	12	1	11	0	13	1	84.6154	7.69231	84.6154	0
78	0	5	0	1	14	0	2	0	6	0	0	0	0	0	0	0	1	0	20	2	1	22	21	2	17	0	23	1	95.6522	8.69565	73.913	0
79	0	5	0	0	11	0	0	0	7	0	0	0	0	0	0	0	0	0	18	0	0	18	18	0	11	0	18	1	100	0	61.1111	0
80	0	5	0	1	9	0	1	0	4	0	0	0	0	0	0	0	1	0	13	1	1	14	14	1	11	0	15	1	93.3333	6.66667	73.3333	0
81	0	5	0	0	26	1	0	0	4	0	0	0	0	0	0	0	0	1	30	0	1	30	30	1	27	0	31	1	96.7742	3.22581	87.0968	0
82	0	5	0	0	9	0	3	0	10	0	0	0	0	0	0	0	0	0	19	3	0	22	19	3	12	0	22	1	100	13.6364	54.5455	0
83	0	5	0	0	13	0	2	0	7	0	0	0	0	0	0	0	0	0	20	2	0	22	20	2	15	0	22	1	100	9.09091	68.1818	0
84	0	5	0	0	2	1	0	1	0	0	0	0	0	0	0	0	1	0	2	0	2	2	3	1	3	0	4	1	50	25	75	0
85	0	5	0	0	3	0	1	0	1	0	0	0	0	0	0	0	0	0	4	1	0	5	4	1	4	0	5	1	100	20	80	0
86	0	5	0	1	8	0	0	0	1	0	0	0	0	0	0	0	1	1	9	0	1	9	10	0	9	0	10	1	90	0	90	0
87	0	5	0	0	2	0	2	0	2	0	0	0	0	0	0	0	0	0	4	2	0	6	4	2	4	0	6	1	100	33.3333	66.6667	0
88	0	5	0	3	1	1	0	3	1	1	0	0	0	0	0	1	6	3	2	0	8	2	8	2	5	0	10	1	20	20	50	0
89	0	5	0	5	15	1	2	3	4	0	0	0	0	0	0	0	8	1	19	2	9	21	27	3	23	0	30	1	70	10	76.6667	0
90	0	5	0	0	15	0	0	0	3	0	0	0	0	0	0	0	0	2	18	0	0	18	18	0	15	0	18	1	100	0	83.3333	0
91	0	5	0	0	13	0	3	0	12	0	1	0	0	0	0	1	0	0	25	4	0	29	25	4	16	0	29	1	100	13.7931	55.1724	0
92	0	5	0	0	19	0	6	0	22	0	0	0	0	0	0	0	0	1	41	6	0	47	41	6	25	0	47	1	100	12.766	53.1915	0
93	0	5	0	2	17	0	4	2	12	1	1	0	0	0	0	2	4	1	29	5	5	34	33	6	23	0	39	1	87.1795	15.3846	58.9744	0
94	0	5	0	3	9	0	5	0	17	0	0	0	0	0	0	0	3	0	26	5	3	31	29	5	17	0	34	1	91.1765	14.7059	50	0
95	0	5	0	0	3	0	0	0	0	0	0	0	0	0	0	0	0	0	3	0	0	3	3	0	3	0	3	1	100	0	100	0
96	0	5	0	0	18	0	1	0	3	0	0	0	0	0	0	0	0	0	21	1	0	22	21	1	19	0	22	1	100	4.54545	86.3636	0
97	0	5	0	2	15	0	0	0	5	0	0	0	0	0	0	0	2	0	20	0	2	20	22	0	17	0	22	1	90.9091	0	77.2727	0
98	0	5	0	0	34	0	1	1	7	0	2	0	0	0	0	2	1	0	41	3	1	44	42	3	35	0	45	1	97.7778	6.66667	77.7778	0
99	0	5	0	0	8	0	4	0	7	0	0	0	0	0	0	0	0	0	15	4	0	19	15	4	12	0	19	1	100	21.0526	63.1579	0
100	0	5	0	0	12	0	4	1	13	1	1	0	0	0	0	2	1	0	25	5	2	30	26	6	16	0	32	1	93.75	18.75	50	0
101	0	5	0	0	7	0	0	0	2	0	0	0	0	0	0	0	0	0	9	0	0	9	9	0	7	0	9	1	100	0	77.7778	0
102	0	5	0	0	20	0	6	0	14	0	0	0	0	0	0	0	0	0	34	6	0	40	34	6	26	0	40	1	100	15	65	0
103	0	5	0	0	25	0	7	0	10	0	0	0	0	0	0	0	0	0	35	7	0	42	35	7	32	0	42	1	100	16.6667	76.1905	0
104	0	5	0	0	13	0	3	0	9	0	1	0	0	0	0	1	0	0	22	4	0	26	22	4	16	0	26	1	100	15.3846	61.5385	0
105	0	5	0	4	38	1	2	6	10	0	0	0	0	0	0	0	10	1	48	2	11	50	58	3	45	0	61	1	81.9672	4.91803	73.7705	0
106	0	5	0	10	17	0	0	1	5	1	0	0	0	0	0	1	11	0	22	0	12	22	33	1	27	0	34	1	64.7059	2.94118	79.4118	0
107	0	5	0	0	5	0	4	3	12	0	0	0	0	0	0	0	3	0	17	4	3	21	20	4	9	0	24	1	87.5	16.6667	37.5	0
108	0	5	0	0	3	0	0	0	2	0	0	0	0	0	0	0	0	1	5	0	0	5	5	0	3	0	5	1	100	0	60	0
109	0	5	0	0	18	0	4	0	11	0	0	0	0	0	0	0	0	0	29	4	0	33	29	4	22	0	33	1	100	12.1212	66.6667	0
110	0	5	0	5	9	0	0	0	7	0	0	0	0	0	0	0	5	0	16	0	5	16	21	0	14	0	21	1	76.1905	0	66.6667	0
111	0	5	0	2	21	0	1	0	3	0	0	0	0	0	0	0	2	0	24	1	2	25	26	1	24	0	27	1	92.5926	3.7037	88.8889	0
112	0	5	0	0	6	0	0	0	4	0	0	0	0	0	0	0	0	0	10	0	0	10	10	0	6	0	10	1	100	0	60	0
113	0	5	0	0	21	0	1	0	12	0	0	0	0	0	0	0	0	0	33	1	0	34	33	1	22	0	34	1	100	2.94118	64.7059	0
114	0	5	0	0	5	0	7	0	26	0	1	0	0	0	0	1	0	0	31	8	0	39	31	8	12	0	39	1	100	20.5128	30.7692	0
115	0	5	0	0	5	0	10	0	13	1	0	0	0	0	0	1	0	1	18	10	1	28	18	11	15	0	29	1	96.5517	37.931	51.7241	0
116	0	5	0	0	14	0	31	0	31	0	0	0	0	0	0	0	0	0	45	31	0	76	45	31	45	0	76	1	100	40.7895	59.2105	0
117	0	5	0	3	7	3	3	3	7	0	0	0	0	0	0	0	6	3	14	3	9	17	20	6	16	0	26	1	65.3846	23.0769	61.5385	0
118	0	5	0	0	10	0	5	0	16	0	1	0	0	0	0	1	0	0	26	6	0	32	26	6	15	0	32	1	100	18.75	46.875	0
119	0	5	0	1	10	2	1	1	7	0	0	0	0	0	0	0	2	2	17	1	4	18	19	3	14	0	22	1	81.8182	13.6364	63.6364	0
120	0	5	0	0	12	0	4	0	4	0	1	0	0	0	0	1	0	0	16	5	0	21	16	5	16	0	21	1	100	23.8095	76.1905	0
121	0	5	0	3	11	1	3	5	21	0	0	0	0	0	0	0	8	1	32	3	9	35	40	4	18	0	44	1	79.5455	9.09091	40.9091	0
1	0	6	0	0	0	1	0	0	1	0	0	0	0	0	0	0	0	1	1	0	1	1	1	1	1	0	2	1	50	50	50	0
2	0	6	0	0	0	1	1	1	2	0	0	0	0	0	0	0	1	1	2	1	2	3	3	2	2	0	5	1	60	40	40	0
3	0	6	0	0	2	0	0	0	0	2	0	0	0	0	0	2	0	2	2	0	2	2	2	2	2	0	4	1	50	50	50	0
4	0	6	0	2	2	0	7	0	0	2	0	0	0	0	0	2	2	2	2	7	4	9	4	9	11	0	13	1	69.2308	69.2308	84.6154	0
5	0	6	0	0	3	0	2	0	2	0	0	0	0	0	0	0	0	0	5	2	0	7	5	2	5	0	7	1	100	28.5714	71.4286	0
6	0	6	0	1	0	1	38	1	9	1	14	0	0	0	0	15	2	2	9	52	4	61	11	54	40	0	65	1	93.8462	83.0769	61.5385	0
7	0	6	0	0	10	3	9	0	2	1	15	0	0	0	0	16	0	4	12	24	4	36	12	28	22	0	40	1	90	70	55	0
8	0	6	0	0	10	4	12	0	6	0	4	0	0	0	0	4	0	4	16	16	4	32	16	20	26	0	36	1	88.8889	55.5556	72.2222	0
9	0	6	0	0	8	2	20	0	12	2	5	0	0	0	0	7	0	4	20	25	4	45	20	29	30	0	49	1	91.8367	59.1837	61.2245	0
10	0	6	0	6	2	52	1	5	2	13	0	0	0	0	0	13	11	65	4	1	76	5	15	66	61	0	81	1	6.17284	81.4815	75.3086	0
11	0	6	0	0	5	47	3	20	3	22	2	0	0	0	0	24	20	69	8	5	89	13	28	74	55	0	102	1	12.7451	72.549	53.9216	0
12	0	6	0	6	15	1	16	5	25	0	0	0	0	0	0	0	11	1	40	16	12	56	51	17	38	0	68	1	82.3529	25	55.8824	0
13	0	6	0	20	0	10	16	6	16	6	5	0	0	0	0	11	26	16	16	21	42	37	42	37	46	0	79	1	46.8354	46.8354	58.2278	0
14	0	6	0	13	36	42	69	1	12	4	28	0	0	0	0	32	14	46	48	97	60	145	62	143	160	0	205	1	70.7317	69.7561	78.0488	0
15	0	6	0	0	0	21	21	1	11	6	7	0	0	0	0	13	1	27	11	28	28	39	12	55	42	0	67	1	58.209	82.0896	62.6866	0
16	0	6	0	2	29	10	10	0	67	0	13	0	0	0	0	13	2	10	96	23	12	119	98	33	51	0	131	1	90.8397	25.1908	38.9313	0
17	0	6	0	0	5	4	19	0	19	0	0	0	0	0	0	0	0	4	24	19	4	43	24	23	28	0	47	1	91.4894	48.9362	59.5745	0
18	0	6	0	3	19	6	20	1	14	1	10	0	0	0	0	11	4	7	33	30	11	63	37	37	48	0	74	1	85.1351	50	64.8649	0
19	0	6	0	11	7	11	3	2	2	1	0	0	0	0	0	1	13	12	9	3	25	12	22	15	32	0	37	1	32.4324	40.5405	86.4865	0
20	0	6	0	7	37	9	4	4	2	0	0	0	0	0	0	0	11	9	39	4	20	43	50	13	57	0	63	1	68.254	20.6349	90.4762	0
21	0	6	0	0	21	0	3	0	4	2	1	0	0	0	0	3	0	2	25	4	2	29	25	6	24	0	31	1	93.5484	19.3548	77.4194	0
22	0	6	0	0	39	1	9	0	9	0	5	0	0	0	0	5	0	1	48	14	1	62	48	15	49	0	63	1	98.4127	23.8095	77.7778	0
23	0	6	0	1	38	1	9	0	10	0	2	0	0	0	0	2	1	1	48	11	2	59	49	12	49	0	61	1	96.7213	19.6721	80.3279	0
24	0	6	0	0	61	1	7	1	2	0	6	0	0	0	0	6	1	1	63	13	2	76	64	14	69	0	78	1	97.4359	17.9487	88.4615	0
25	0	6	0	4	38	2	1	1	3	0	2	0	0	0	0	2	5	2	41	3	7	44	46	5	45	0	51	1	86.2745	9.80392	88.2353	0
26	0	6	0	0	18	2	2	1	2	1	5	0	0	0	0	6	1	3	20	7	4	27	21	10	22	0	31	1	87.0968	32.2581	70.9677	0
27	0	6	0	16	12	7	3	4	3	2	3	0	0	0	0	5	20	9	15	6	29	21	35	15	38	0	50	1	42	30	76	0
28	0	6	0	0	63	0	6	0	3	1	1	0	0	0	0	2	0	1	66	7	1	73	66	8	69	0	74	1	98.6486	10.8108	93.2432	0
29	0	6	0	7	6	3	9	2	8	0	2	0	0	0	0	2	9	3	14	11	12	25	23	14	25	0	37	1	67.5676	37.8378	67.5676	0
30	0	6	0	13	6	2	2	0	1	0	0	0	0	0	0	0	13	2	7	2	15	9	20	4	23	0	24	1	37.5	16.6667	95.8333	0
31	0	6	0	13	0	2	5	1	6	1	4	0	0	0	0	5	14	3	6	9	17	15	20	12	20	0	32	1	46.875	37.5	62.5	0
32	0	6	0	0	48	1	21	0	19	0	4	0	0	0	0	4	0	1	67	25	1	92	67	26	70	0	93	1	98.9247	27.957	75.2688	0
33	0	6	0	0	39	0	4	0	7	0	0	0	0	0	0	0	0	0	46	4	0	50	46	4	43	0	50	1	100	8	86	0
34	0	6	0	0	33	2	32	0	27	0	2	0	0	0	0	2	0	2	60	34	2	94	60	36	67	0	96	1	97.9167	37.5	69.7917	0
35	0	6	0	2	11	1	1	0	3	0	1	0	0	0	0	1	2	1	14	2	3	16	16	3	15	0	19	1	84.2105	15.7895	78.9474	0
36	0	6	0	0	14	0	8	0	6	0	1	0	0	0	0	1	0	0	20	9	0	29	20	9	22	0	29	1	100	31.0345	75.8621	0
37	0	6	0	2	14	6	12	5	15	1	0	0	0	0	0	1	7	7	29	12	14	41	36	19	34	0	55	1	74.5455	34.5455	61.8182	0
38	0	6	0	0	11	2	10	0	8	0	0	0	0	0	0	0	0	2	19	10	2	29	19	12	23	0	31	1	93.5484	38.7097	74.1935	0
39	0	6	0	0	18	1	5	0	6	2	2	0	0	0	0	4	0	3	24	7	3	31	24	10	24	0	34	1	91.1765	29.4118	70.5882	0
40	0	6	0	2	21	4	3	1	5	0	0	0	0	0	0	0	3	4	26	3	7	29	29	7	30	0	36	1	80.5556	19.4444	83.3333	0
41	0	6	0	0	35	1	1	0	3	0	1	0	0	0	0	1	0	1	38	2	1	40	38	3	37	0	41	1	97.561	7.31707	90.2439	0
42	0	6	0	0	8	1	10	0	6	0	1	0	0	0	0	1	0	1	14	11	1	25	14	12	19	0	26	1	96.1538	46.1538	73.0769	0
43	0	6	0	0	3	1	1	0	0	0	0	0	0	0	0	0	0	1	3	1	1	4	3	2	5	0	5	1	80	40	100	0
44	0	6	0	0	10	3	13	2	6	2	2	0	0	0	0	4	2	5	16	15	7	31	18	20	26	0	38	1	81.5789	52.6316	68.4211	0
45	0	6	0	0	12	3	3	1	3	0	0	0	0	0	0	0	1	3	15	3	4	18	16	6	18	0	22	1	81.8182	27.2727	81.8182	0
46	0	6	0	0	20	0	4	0	3	0	3	0	0	0	0	3	0	0	23	7	0	30	23	7	24	0	30	1	100	23.3333	80	0
47	0	6	0	1	5	0	3	0	2	0	0	0	0	0	0	0	1	0	7	3	1	10	8	3	9	0	11	1	90.9091	27.2727	81.8182	0
48	0	6	0	2	3	0	3	0	3	0	0	0	0	0	0	0	2	0	6	3	2	9	8	3	8	0	11	1	81.8182	27.2727	72.7273	0
49	0	6	0	0	9	0	4	1	5	0	0	0	0	0	0	0	1	0	14	4	1	18	15	4	13	0	19	1	94.7368	21.0526	68.4211	0
50	0	6	0	2	1	1	0	0	0	0	0	0	0	0	0	0	2	1	1	0	3	1	3	1	4	0	4	1	25	25	100	0
51	0	6	0	0	3	0	2	0	1	0	1	0	0	0	0	1	0	0	4	3	0	7	4	3	5	0	7	1	100	42.8571	71.4286	0
52	0	6	0	0	5	1	2	0	2	0	4	0	0	0	0	4	0	1	7	6	1	13	7	7	8	0	14	1	92.8571	50	57.1429	0
53	0	6	0	0	5	0	1	0	1	0	0	0	0	0	0	0	0	0	6	1	0	7	6	1	6	0	7	1	100	14.2857	85.7143	0
54	0	6	0	0	10	5	8	2	8	0	0	0	0	0	0	0	2	5	18	8	7	26	20	13	23	0	33	1	78.7879	39.3939	69.697	0
55	0	6	0	3	1	1	6	1	4	0	1	0	0	0	0	1	4	1	5	7	5	12	9	8	11	0	17	1	70.5882	47.0588	64.7059	0
56	0	6	0	1	1	0	2	0	2	0	0	0	0	0	0	0	1	0	3	2	1	5	4	2	4	0	6	1	83.3333	33.3333	66.6667	0
57	0	6	0	0	6	0	4	0	5	0	0	0	0	0	0	0	0	0	11	4	0	15	11	4	10	0	15	1	100	26.6667	66.6667	0
58	0	6	0	0	6	0	3	0	2	0	0	0	0	0	0	0	0	0	8	3	0	11	8	3	9	0	11	1	100	27.2727	81.8182	0
59	0	6	0	0	8	1	5	0	4	0	0	0	0	0	0	0	0	1	12	5	1	17	12	6	14	0	18	1	94.4444	33.3333	77.7778	0
60	0	6	0	3	0	0	5	0	5	0	0	0	0	0	0	0	3	0	5	5	3	10	8	5	8	0	13	1	76.9231	38.4615	61.5385	0
61	0	6	0	0	0	0	1	0	2	0	0	0	0	0	0	0	0	0	2	1	0	3	2	1	1	0	3	1	100	33.3333	33.3333	0
62	0	6	0	0	0	0	3	0	2	0	1	0	0	0	0	1	0	0	2	4	0	6	2	4	3	0	6	1	100	66.6667	50	0
63	0	6	0	0	0	0	6	0	6	1	1	0	0	0	0	2	0	1	6	7	1	13	6	8	6	0	14	1	92.8571	57.1429	42.8571	0
64	0	6	0	0	1	1	2	1	2	0	0	0	0	0	0	0	1	1	3	2	2	5	4	3	4	0	7	1	71.4286	42.8571	57.1429	0
65	0	6	0	0	0	2	6	1	6	0	1	0	0	0	0	1	1	2	6	7	3	13	7	9	8	0	16	1	81.25	56.25	50	0
66	0	6	0	0	2	1	5	1	5	0	1	0	0	0	0	1	1	1	7	6	2	13	8	7	8	0	15	1	86.6667	46.6667	53.3333	0
67	0	6	0	0	6	0	2	0	3	0	0	0	0	0	0	0	0	0	9	2	0	11	9	2	8	0	11	1	100	18.1818	72.7273	0
68	0	6	0	0	8	0	5	0	6	1	3	0	0	0	0	4	0	1	14	8	1	22	14	9	13	0	23	1	95.6522	39.1304	56.5217	0
69	0	6	0	0	1	0	6	0	9	0	0	0	0	0	0	0	0	0	10	6	0	16	10	6	7	0	16	1	100	37.5	43.75	0
70	0	6	0	0	8	0	3	1	1	0	0	0	0	0	0	0	1	0	9	3	1	12	10	3	11	0	13	1	92.3077	23.0769	84.6154	0
71	0	6	0	0	13	1	1	0	2	1	1	0	0	0	0	2	0	2	15	2	2	17	15	4	15	0	19	1	89.4737	21.0526	78.9474	0
72	0	6	0	0	28	1	3	0	2	0	0	0	0	0	0	0	0	1	30	3	1	33	30	4	32	0	34	1	97.0588	11.7647	94.1176	0
73	0	6	0	0	0	1	6	0	7	1	2	0	0	0	0	3	0	2	7	8	2	15	7	10	7	0	17	1	88.2353	58.8235	41.1765	0
74	0	6	0	0	1	0	14	0	13	0	0	0	0	0	0	0	0	0	14	14	0	28	14	14	15	0	28	1	100	50	53.5714	0
75	0	6	0	0	0	0	6	0	5	0	0	0	0	0	0	0	0	0	5	6	0	11	5	6	6	0	11	1	100	54.5455	54.5455	0
76	0	6	0	0	0	1	12	0	12	0	1	0	0	0	0	1	0	1	12	13	1	25	12	14	13	0	26	1	96.1538	53.8462	50	0
77	0	6	0	0	4	0	4	0	5	0	0	0	0	0	0	0	0	0	9	4	0	13	9	4	8	0	13	1	100	30.7692	61.5385	0
78	0	6	0	1	8	0	3	0	3	0	0	0	0	0	0	0	1	0	11	3	1	14	12	3	12	0	15	1	93.3333	20	80	0
79	0	6	0	0	10	0	8	0	5	0	1	0	0	0	0	1	0	0	15	9	0	24	15	9	18	0	24	1	100	37.5	75	0
80	0	6	0	0	4	1	3	3	3	0	0	0	0	0	0	0	3	1	7	3	4	10	10	4	8	0	14	1	71.4286	28.5714	57.1429	0
81	0	6	0	0	0	0	1	0	6	0	0	0	0	0	0	0	0	0	6	1	0	7	6	1	1	0	7	1	100	14.2857	14.2857	0
82	0	6	0	0	11	0	4	0	6	0	0	0	0	0	0	0	0	0	17	4	0	21	17	4	15	0	21	1	100	19.0476	71.4286	0
83	0	6	0	0	4	0	6	0	6	0	0	0	0	0	0	0	0	0	10	6	0	16	10	6	10	0	16	1	100	37.5	62.5	0
84	0	6	0	0	4	0	5	0	7	0	1	0	0	0	0	1	0	0	11	6	0	17	11	6	9	0	17	1	100	35.2941	52.9412	0
85	0	6	0	0	2	0	4	0	4	0	0	0	0	0	0	0	0	0	6	4	0	10	6	4	6	0	10	1	100	40	60	0
86	0	6	0	0	2	0	1	0	1	2	0	0	0	0	0	2	0	2	3	1	2	4	3	3	3	0	6	1	66.6667	50	50	0
87	0	6	0	0	3	1	2	0	2	0	0	0	0	0	0	0	0	1	5	2	1	7	5	3	6	0	8	1	87.5	37.5	75	0
88	0	6	0	0	2	0	9	0	9	0	0	0	0	0	0	0	0	0	11	9	0	20	11	9	11	0	20	1	100	45	55	0
89	0	6	0	0	3	2	6	2	6	0	2	0	0	0	0	2	2	2	9	8	4	17	11	10	11	0	21	1	80.9524	47.619	52.381	0
90	0	6	0	4	12	4	5	4	4	2	4	0	0	0	0	6	8	6	16	9	14	25	24	15	25	0	39	1	64.1026	38.4615	64.1026	0
91	0	6	0	0	8	0	8	0	9	0	0	0	0	0	0	0	0	0	17	8	0	25	17	8	16	0	25	1	100	32	64	0
92	0	6	0	0	1	1	11	0	10	0	1	0	0	0	0	1	0	1	11	12	1	23	11	13	13	0	24	1	95.8333	54.1667	54.1667	0
93	0	6	0	0	1	0	30	0	31	1	4	0	0	0	0	5	0	1	32	34	1	66	32	35	31	0	67	1	98.5075	52.2388	46.2687	0
94	0	6	0	0	8	2	14	0	13	1	0	0	0	0	0	1	0	3	21	14	3	35	21	17	24	0	38	1	92.1053	44.7368	63.1579	0
95	0	6	0	0	2	0	6	0	7	0	0	0	0	0	0	0	0	0	9	6	0	15	9	6	8	0	15	1	100	40	53.3333	0
96	0	6	0	0	1	0	10	0	8	0	0	0	0	0	0	0	0	0	9	10	0	19	9	10	11	0	19	1	100	52.6316	57.8947	0
97	0	6	0	0	8	2	7	2	7	0	1	0	0	0	0	1	2	2	15	8	4	23	17	10	17	0	27	1	85.1852	37.037	62.963	0
98	0	6	0	0	6	0	11	0	11	0	1	0	0	0	0	1	0	0	17	12	0	29	17	12	17	0	29	1	100	41.3793	58.6207	0
99	0	6	0	0	1	0	6	0	6	0	0	0	0	0	0	0	0	0	7	6	0	13	7	6	7	0	13	1	100	46.1538	53.8462	0
100	0	6	0	20	5	7	4	9	4	0	0	0	0	0	0	0	29	7	9	4	36	13	38	11	36	0	49	1	26.5306	22.449	73.4694	0
101	0	6	0	0	7	0	11	0	12	0	3	0	0	0	0	3	0	0	19	14	0	33	19	14	18	0	33	1	100	42.4242	54.5455	0
102	0	6	0	0	7	0	1	0	5	0	2	0	0	0	0	2	0	0	12	3	0	15	12	3	8	0	15	1	100	20	53.3333	0
103	0	6	0	0	23	0	19	0	19	0	1	0	0	0	0	1	0	0	42	20	0	62	42	20	42	0	62	1	100	32.2581	67.7419	0
104	0	6	0	1	5	0	21	0	22	0	0	0	0	0	0	0	1	0	27	21	1	48	28	21	27	0	49	1	97.9592	42.8571	55.102	0
105	0	6	0	0	2	0	6	0	6	0	2	0	0	0	0	2	0	0	8	8	0	16	8	8	8	0	16	1	100	50	50	0
106	0	6	0	0	2	5	33	5	37	1	3	0	0	0	0	4	5	6	39	36	11	75	44	42	40	0	86	1	87.2093	48.8372	46.5116	0
107	0	6	0	2	2	0	6	1	5	0	0	0	0	0	0	0	3	0	7	6	3	13	10	6	10	0	16	1	81.25	37.5	62.5	0
108	0	6	0	0	6	0	11	0	12	0	2	0	0	0	0	2	0	0	18	13	0	31	18	13	17	0	31	1	100	41.9355	54.8387	0
109	0	6	0	0	16	0	3	0	3	0	0	0	0	0	0	0	0	0	19	3	0	22	19	3	19	0	22	1	100	13.6364	86.3636	0
110	0	6	0	0	7	1	9	1	10	0	1	0	0	0	0	1	1	1	17	10	2	27	18	11	17	0	29	1	93.1034	37.931	58.6207	0
111	0	6	0	1	8	2	7	2	7	0	1	0	0	0	0	1	3	2	15	8	5	23	18	10	18	0	28	1	82.1429	35.7143	64.2857	0
112	0	6	0	0	3	0	5	0	4	0	0	0	0	0	0	0	0	0	7	5	0	12	7	5	8	0	12	1	100	41.6667	66.6667	0
113	0	6	0	0	3	0	3	0	3	0	0	0	0	0	0	0	0	0	6	3	0	9	6	3	6	0	9	1	100	33.3333	66.6667	0
114	0	6	0	0	1	0	6	0	6	0	2	0	0	0	0	2	0	0	7	8	0	15	7	8	7	0	15	1	100	53.3333	46.6667	0
115	0	6	0	0	1	0	7	0	6	0	2	0	0	0	0	2	0	0	7	9	0	16	7	9	8	0	16	1	100	56.25	50	0
116	0	6	0	0	3	1	9	1	9	0	0	0	0	0	0	0	1	1	12	9	2	21	13	10	13	0	23	1	91.3043	43.4783	56.5217	0
117	0	6	0	0	3	2	50	1	45	0	0	0	0	0	0	0	1	2	48	50	3	98	49	52	55	0	101	1	97.0297	51.4851	54.4554	0
118	0	6	0	0	3	2	9	0	7	0	5	0	0	0	0	5	0	2	10	14	2	24	10	16	14	0	26	1	92.3077	61.5385	53.8462	0
119	0	6	0	3	3	0	10	0	16	0	0	0	0	0	0	0	3	0	19	10	3	29	22	10	16	0	32	1	90.625	31.25	50	0
120	0	6	0	2	0	1	3	0	3	0	2	0	0	0	0	2	2	1	3	5	3	8	5	6	6	0	11	1	72.7273	54.5455	54.5455	0
121	0	6	0	0	0	1	28	1	23	0	5	0	0	0	0	5	1	1	23	33	2	56	24	34	29	0	58	1	96.5517	58.6207	50	0
1	0	7	0	3	0	1	0	0	1	1	0	0	0	0	0	1	3	2	1	0	5	1	4	2	4	0	6	1	16.6667	33.3333	66.6667	0
2	0	7	0	0	0	8	5	2	5	3	1	0	0	0	0	4	2	11	5	6	13	11	7	17	13	0	24	1	45.8333	70.8333	54.1667	0
3	0	7	0	0	1	5	2	3	3	2	0	0	0	0	0	2	3	7	4	2	10	6	7	9	8	0	16	1	37.5	56.25	50	0
4	0	7	0	0	1	9	2	0	0	2	0	0	0	0	0	2	0	11	1	2	11	3	1	13	12	0	14	1	21.4286	92.8571	85.7143	0
5	0	7	0	2	2	10	6	2	1	2	2	0	0	0	0	4	4	12	3	8	16	11	7	20	20	0	27	1	40.7407	74.0741	74.0741	0
6	0	7	0	2	4	10	20	3	10	2	5	0	0	0	0	7	5	12	14	25	17	39	19	37	36	0	56	1	69.6429	66.0714	64.2857	0
7	0	7	0	0	5	3	77	2	60	2	44	0	0	0	0	46	2	5	65	121	7	186	67	126	85	0	193	1	96.3731	65.285	44.0415	0
8	0	7	0	2	4	44	2	6	2	17	2	0	0	0	0	19	8	61	6	4	69	10	14	65	52	0	79	1	12.6582	82.2785	65.8228	0
9	0	7	0	0	0	4	24	1	10	1	4	0	0	0	0	5	1	5	10	28	6	38	11	33	28	0	44	1	86.3636	75	63.6364	0
10	0	7	0	0	3	5	5	1	1	7	5	0	0	0	0	12	1	12	4	10	13	14	5	22	13	0	27	1	51.8519	81.4815	48.1481	0
11	0	7	0	1	6	12	18	0	10	2	19	0	0	0	0	21	1	14	16	37	15	53	17	51	37	0	68	1	77.9412	75	54.4118	0
12	0	7	0	4	13	16	11	3	7	8	3	0	0	0	0	11	7	24	20	14	31	34	27	38	44	0	65	1	52.3077	58.4615	67.6923	0
13	0	7	0	1	0	2	10	0	10	1	5	0	0	0	0	6	1	3	10	15	4	25	11	18	13	0	29	1	86.2069	62.069	44.8276	0
14	0	7	0	6	8	17	21	3	11	5	4	0	0	0	0	9	9	22	19	25	31	44	28	47	52	0	75	1	58.6667	62.6667	69.3333	0
15	0	7	0	0	0	21	21	0	20	2	46	0	0	0	0	48	0	23	20	67	23	87	20	90	42	0	110	1	79.0909	81.8182	38.1818	0
16	0	7	0	0	1	12	12	7	16	4	4	0	0	0	0	8	7	16	17	16	23	33	24	32	25	0	56	1	58.9286	57.1429	44.6429	0
17	0	7	0	3	44	2	49	5	52	2	10	0	0	0	0	12	8	4	96	59	12	155	104	63	98	0	167	1	92.8144	37.7246	58.6826	0
18	0	7	0	14	15	10	41	2	27	8	13	0	0	0	0	21	16	18	42	54	34	96	58	72	80	0	130	1	73.8462	55.3846	61.5385	0
19	0	7	0	0	36	1	12	0	8	0	2	0	0	0	0	2	0	1	44	14	1	58	44	15	49	0	59	1	98.3051	25.4237	83.0508	0
20	0	7	0	10	14	12	1	5	2	2	0	0	0	0	0	2	15	14	16	1	29	17	31	15	37	0	46	1	36.9565	32.6087	80.4348	0
21	0	7	0	3	19	2	0	0	1	0	0	0	0	0	0	0	3	2	20	0	5	20	23	2	24	0	25	1	80	8	96	0
22	0	7	0	2	22	2	8	0	6	1	4	0	0	0	0	5	2	3	28	12	5	40	30	15	34	0	45	1	88.8889	33.3333	75.5556	0
23	0	7	0	0	14	1	10	0	7	0	2	0	0	0	0	2	0	1	21	12	1	33	21	13	25	0	34	1	97.0588	38.2353	73.5294	0
24	0	7	0	19	18	1	6	0	7	0	3	0	0	0	0	3	19	1	25	9	20	34	44	10	44	0	54	1	62.963	18.5185	81.4815	0
25	0	7	0	0	24	1	13	0	10	1	1	0	0	0	0	2	0	2	34	14	2	48	34	16	38	0	50	1	96	32	76	0
26	0	7	0	0	16	0	3	0	2	0	0	0	0	0	0	0	0	0	18	3	0	21	18	3	19	0	21	1	100	14.2857	90.4762	0
27	0	7	0	0	15	0	17	0	4	0	5	0	0	0	0	5	0	0	19	22	0	41	19	22	32	0	41	1	100	53.6585	78.0488	0
28	0	7	0	0	38	2	7	1	7	2	3	0	0	0	0	5	1	4	45	10	5	55	46	14	47	0	60	1	91.6667	23.3333	78.3333	0
29	0	7	0	0	10	4	22	1	19	1	4	0	0	0	0	5	1	5	29	26	6	55	30	31	36	0	61	1	90.1639	50.8197	59.0164	0
30	0	7	0	7	0	3	4	1	6	0	0	0	0	0	0	0	8	3	6	4	11	10	14	7	14	0	21	1	47.619	33.3333	66.6667	0
31	0	7	0	10	18	8	5	3	1	0	1	0	0	0	0	1	13	8	19	6	21	25	32	14	41	0	46	1	54.3478	30.4348	89.1304	0
32	0	7	0	0	25	1	6	0	5	0	1	0	0	0	0	1	0	1	30	7	1	37	30	8	32	0	38	1	97.3684	21.0526	84.2105	0
33	0	7	0	0	5	8	20	2	12	3	5	0	0	0	0	8	2	11	17	25	13	42	19	36	33	0	55	1	76.3636	65.4545	60	0
34	0	7	0	0	10	0	15	0	13	0	0	0	0	0	0	0	0	0	23	15	0	38	23	15	25	0	38	1	100	39.4737	65.7895	0
35	0	7	0	0	8	10	19	3	14	1	7	0	0	0	0	8	3	11	22	26	14	48	25	37	37	0	62	1	77.4194	59.6774	59.6774	0
36	0	7	0	4	0	8	6	5	3	0	0	0	0	0	0	0	9	8	3	6	17	9	12	14	18	0	26	1	34.6154	53.8462	69.2308	0
37	0	7	0	0	2	2	1	1	0	2	1	0	0	0	0	3	1	4	2	2	5	4	3	6	5	0	9	1	44.4444	66.6667	55.5556	0
38	0	7	0	0	2	0	2	0	2	0	4	0	0	0	0	4	0	0	4	6	0	10	4	6	4	0	10	1	100	60	40	0
39	0	7	0	0	11	0	7	0	5	0	2	0	0	0	0	2	0	0	16	9	0	25	16	9	18	0	25	1	100	36	72	0
40	0	7	0	0	17	4	8	0	4	1	2	0	0	0	0	3	0	5	21	10	5	31	21	15	29	0	36	1	86.1111	41.6667	80.5556	0
41	0	7	0	3	5	3	7	0	6	0	1	0	0	0	0	1	3	3	11	8	6	19	14	11	18	0	25	1	76	44	72	0
42	0	7	0	3	0	1	1	1	1	0	0	0	0	0	0	0	4	1	1	1	5	2	5	2	5	0	7	1	28.5714	28.5714	71.4286	0
43	0	7	0	0	2	0	2	0	2	0	1	0	0	0	0	1	0	0	4	3	0	7	4	3	4	0	7	1	100	42.8571	57.1429	0
44	0	7	0	0	8	0	6	0	4	0	0	0	0	0	0	0	0	0	12	6	0	18	12	6	14	0	18	1	100	33.3333	77.7778	0
45	0	7	0	0	0	3	7	1	7	1	2	0	0	0	0	3	1	4	7	9	5	16	8	13	10	0	21	1	76.1905	61.9048	47.619	0
46	0	7	0	0	5	1	4	0	4	0	1	0	0	0	0	1	0	1	9	5	1	14	9	6	10	0	15	1	93.3333	40	66.6667	0
47	0	7	0	0	2	0	1	0	1	0	0	0	0	0	0	0	0	0	3	1	0	4	3	1	3	0	4	1	100	25	75	0
48	0	7	0	0	0	0	3	0	1	0	3	0	0	0	0	3	0	0	1	6	0	7	1	6	3	0	7	1	100	85.7143	42.8571	0
49	0	7	0	0	1	3	8	0	7	1	5	0	0	0	0	6	0	4	8	13	4	21	8	17	12	0	25	1	84	68	48	0
50	0	7	0	0	2	3	2	1	1	0	0	0	0	0	0	0	1	3	3	2	4	5	4	5	7	0	9	1	55.5556	55.5556	77.7778	0
51	0	7	0	0	0	0	0	0	0	0	2	0	0	0	0	2	0	0	0	2	0	2	0	2	0	0	2	1	100	100	0	0
52	0	7	0	1	2	1	3	1	3	0	0	0	0	0	0	0	2	1	5	3	3	8	7	4	7	0	11	1	72.7273	36.3636	63.6364	0
53	0	7	0	0	0	2	3	0	1	0	1	0	0	0	0	1	0	2	1	4	2	5	1	6	5	0	7	1	71.4286	85.7143	71.4286	0
54	0	7	0	0	0	4	3	4	3	0	1	0	0	0	0	1	4	4	3	4	8	7	7	8	7	0	15	1	46.6667	53.3333	46.6667	0
55	0	7	0	0	0	2	16	0	11	3	3	0	0	0	0	6	0	5	11	19	5	30	11	24	18	0	35	1	85.7143	68.5714	51.4286	0
56	0	7	0	0	0	1	6	1	5	1	0	0	0	0	0	1	1	2	5	6	3	11	6	8	7	0	14	1	78.5714	57.1429	50	0
57	0	7	0	0	0	1	2	1	2	0	0	0	0	0	0	0	1	1	2	2	2	4	3	3	3	0	6	1	66.6667	50	50	0
58	0	7	0	0	0	1	2	0	2	0	0	0	0	0	0	0	0	1	2	2	1	4	2	3	3	0	5	1	80	60	60	0
59	0	7	0	0	0	0	1	0	1	0	1	0	0	0	0	1	0	0	1	2	0	3	1	2	1	0	3	1	100	66.6667	33.3333	0
60	0	7	0	0	0	0	5	0	5	0	1	0	0	0	0	1	0	0	5	6	0	11	5	6	5	0	11	1	100	54.5455	45.4545	0
61	0	7	0	0	1	0	1	0	0	0	1	0	0	0	0	1	0	0	1	2	0	3	1	2	2	0	3	1	100	66.6667	66.6667	0
62	0	7	0	0	0	1	4	0	2	0	2	0	0	0	0	2	0	1	2	6	1	8	2	7	5	0	9	1	88.8889	77.7778	55.5556	0
63	0	7	0	0	0	1	4	0	4	0	1	0	0	0	0	1	0	1	4	5	1	9	4	6	5	0	10	1	90	60	50	0
64	0	7	0	0	0	2	9	0	7	1	1	0	0	0	0	2	0	3	7	10	3	17	7	13	11	0	20	1	85	65	55	0
65	0	7	0	0	0	1	12	1	12	1	3	0	0	0	0	4	1	2	12	15	3	27	13	17	13	0	30	1	90	56.6667	43.3333	0
66	0	7	0	0	0	0	5	0	5	0	0	0	0	0	0	0	0	0	5	5	0	10	5	5	5	0	10	1	100	50	50	0
67	0	7	0	0	1	1	3	1	3	0	2	0	0	0	0	2	1	1	4	5	2	9	5	6	5	0	11	1	81.8182	54.5455	45.4545	0
68	0	7	0	0	5	1	3	0	1	1	0	0	0	0	0	1	0	2	6	3	2	9	6	5	9	0	11	1	81.8182	45.4545	81.8182	0
69	0	7	0	0	2	0	5	0	2	0	0	0	0	0	0	0	0	0	4	5	0	9	4	5	7	0	9	1	100	55.5556	77.7778	0
70	0	7	0	0	3	2	3	2	3	0	0	0	0	0	0	0	2	2	6	3	4	9	8	5	8	0	13	1	69.2308	38.4615	61.5385	0
71	0	7	0	0	2	2	2	1	2	0	1	0	0	0	0	1	1	2	4	3	3	7	5	5	6	0	10	1	70	50	60	0
72	0	7	0	0	1	0	1	0	1	0	1	0	0	0	0	1	0	0	2	2	0	4	2	2	2	0	4	1	100	50	50	0
73	0	7	0	0	0	2	5	2	5	0	4	0	0	0	0	4	2	2	5	9	4	14	7	11	7	0	18	1	77.7778	61.1111	38.8889	0
74	0	7	0	0	1	0	6	0	6	1	0	0	0	0	0	1	0	1	7	6	1	13	7	7	7	0	14	1	92.8571	50	50	0
75	0	7	0	0	0	0	5	0	5	0	4	0	0	0	0	4	0	0	5	9	0	14	5	9	5	0	14	1	100	64.2857	35.7143	0
76	0	7	0	0	0	2	8	1	4	0	2	0	0	0	0	2	1	2	4	10	3	14	5	12	10	0	17	1	82.3529	70.5882	58.8235	0
77	0	7	0	0	0	1	7	0	1	1	2	0	0	0	0	3	0	2	1	9	2	10	1	11	8	0	12	1	83.3333	91.6667	66.6667	0
78	0	7	0	2	8	3	6	3	6	3	0	0	0	0	0	3	5	6	14	6	11	20	19	12	19	0	31	1	64.5161	38.7097	61.2903	0
79	0	7	0	0	2	1	2	1	5	0	4	0	0	0	0	4	1	1	7	6	2	13	8	7	5	0	15	1	86.6667	46.6667	33.3333	0
80	0	7	0	0	0	0	7	0	6	0	3	0	0	0	0	3	0	0	6	10	0	16	6	10	7	0	16	1	100	62.5	43.75	0
81	0	7	0	0	3	0	5	0	5	1	1	0	0	0	0	2	0	1	8	6	1	14	8	7	8	0	15	1	93.3333	46.6667	53.3333	0
82	0	7	0	0	0	0	2	0	3	0	0	0	0	0	0	0	0	0	3	2	0	5	3	2	2	0	5	1	100	40	40	0
83	0	7	0	0	0	0	1	0	1	0	0	0	0	0	0	0	0	0	1	1	0	2	1	1	1	0	2	1	100	50	50	0
84	0	7	0	0	0	2	5	2	4	0	0	0	0	0	0	0	2	2	4	5	4	9	6	7	7	0	13	1	69.2308	53.8462	53.8462	0
85	0	7	0	0	0	0	11	0	9	0	0	0	0	0	0	0	0	0	9	11	0	20	9	11	11	0	20	1	100	55	55	0
86	0	7	0	0	1	1	3	1	4	0	1	0	0	0	0	1	1	1	5	4	2	9	6	5	5	0	11	1	81.8182	45.4545	45.4545	0
87	0	7	0	0	0	3	11	3	11	0	0	0	0	0	0	0	3	3	11	11	6	22	14	14	14	0	28	1	78.5714	50	50	0
88	0	7	0	1	0	6	6	3	6	1	0	0	0	0	0	1	4	7	6	6	11	12	10	13	13	0	23	1	52.1739	56.5217	56.5217	0
89	0	7	0	0	2	1	7	0	4	1	1	0	0	0	0	2	0	2	6	8	2	14	6	10	10	0	16	1	87.5	62.5	62.5	0
90	0	7	0	0	0	2	14	2	14	0	2	0	0	0	0	2	2	2	14	16	4	30	16	18	16	0	34	1	88.2353	52.9412	47.0588	0
91	0	7	0	0	1	0	8	0	6	2	2	0	0	0	0	4	0	2	7	10	2	17	7	12	9	0	19	1	89.4737	63.1579	47.3684	0
92	0	7	0	0	3	1	7	1	7	0	1	0	0	0	0	1	1	1	10	8	2	18	11	9	11	0	20	1	90	45	55	0
93	0	7	0	0	0	2	12	1	12	0	4	0	0	0	0	4	1	2	12	16	3	28	13	18	14	0	31	1	90.3226	58.0645	45.1613	0
94	0	7	0	1	0	3	10	3	10	2	1	0	0	0	0	3	4	5	10	11	9	21	14	16	14	0	30	1	70	53.3333	46.6667	0
95	0	7	0	0	2	4	12	1	8	0	0	0	0	0	0	0	1	4	10	12	5	22	11	16	18	0	27	1	81.4815	59.2593	66.6667	0
96	0	7	0	0	0	0	12	0	12	1	4	0	0	0	0	5	0	1	12	16	1	28	12	17	12	0	29	1	96.5517	58.6207	41.3793	0
97	0	7	0	0	0	0	7	0	7	0	1	0	0	0	0	1	0	0	7	8	0	15	7	8	7	0	15	1	100	53.3333	46.6667	0
98	0	7	0	0	0	2	12	2	14	0	0	0	0	0	0	0	2	2	14	12	4	26	16	14	14	0	30	1	86.6667	46.6667	46.6667	0
99	0	7	0	1	4	2	3	2	2	0	2	0	0	0	0	2	3	2	6	5	5	11	9	7	10	0	16	1	68.75	43.75	62.5	0
100	0	7	0	0	9	0	27	0	27	0	3	0	0	0	0	3	0	0	36	30	0	66	36	30	36	0	66	1	100	45.4545	54.5455	0
101	0	7	0	0	2	0	4	0	5	0	0	0	0	0	0	0	0	0	7	4	0	11	7	4	6	0	11	1	100	36.3636	54.5455	0
102	0	7	0	0	2	0	6	0	6	0	5	0	0	0	0	5	0	0	8	11	0	19	8	11	8	0	19	1	100	57.8947	42.1053	0
103	0	7	0	0	2	0	3	0	2	0	0	0	0	0	0	0	0	0	4	3	0	7	4	3	5	0	7	1	100	42.8571	71.4286	0
104	0	7	0	0	0	1	9	1	6	1	7	0	0	0	0	8	1	2	6	16	3	22	7	18	10	0	25	1	88	72	40	0
105	0	7	0	0	5	0	28	0	28	0	0	0	0	0	0	0	0	0	33	28	0	61	33	28	33	0	61	1	100	45.9016	54.0984	0
106	0	7	0	0	2	6	15	3	9	1	2	0	0	0	0	3	3	7	11	17	10	28	14	24	23	0	38	1	73.6842	63.1579	60.5263	0
107	0	7	0	0	2	0	27	0	24	0	6	0	0	0	0	6	0	0	26	33	0	59	26	33	29	0	59	1	100	55.9322	49.1525	0
108	0	7	0	0	4	0	7	1	7	0	0	0	0	0	0	0	1	0	11	7	1	18	12	7	11	0	19	1	94.7368	36.8421	57.8947	0
109	0	7	0	0	5	2	12	2	9	1	1	0	0	0	0	2	2	3	14	13	5	27	16	16	19	0	32	1	84.375	50	59.375	0
110	0	7	0	0	0	0	3	0	3	0	0	0	0	0	0	0	0	0	3	3	0	6	3	3	3	0	6	1	100	50	50	0
111	0	7	0	0	1	0	8	0	9	0	0	0	0	0	0	0	0	0	10	8	0	18	10	8	9	0	18	1	100	44.4444	50	0
112	0	7	0	0	2	2	3	3	3	0	0	0	0	0	0	0	3	2	5	3	5	8	8	5	7	0	13	1	61.5385	38.4615	53.8462	0
113	0	7	0	0	0	1	7	1	3	0	2	0	0	0	0	2	1	1	3	9	2	12	4	10	8	0	14	1	85.7143	71.4286	57.1429	0
114	0	7	0	0	0	4	11	3	11	1	4	0	0	0	0	5	3	5	11	15	8	26	14	20	15	0	34	1	76.4706	58.8235	44.1176	0
115	0	7	0	3	3	6	16	0	15	0	4	0	0	0	0	4	3	6	18	20	9	38	21	26	28	0	47	1	80.8511	55.3191	59.5745	0
116	0	7	0	0	0	7	8	0	7	2	1	0	0	0	0	3	0	9	7	9	9	16	7	18	15	0	25	1	64	72	60	0
117	0	7	0	0	0	1	12	0	12	0	0	0	0	0	0	0	0	1	12	12	1	24	12	13	13	0	25	1	96	52	52	0
118	0	7	0	0	0	2	22	0	14	0	3	0	0	0	0	3	0	2	14	25	2	39	14	27	24	0	41	1	95.122	65.8537	58.5366	0
119	0	7	0	0	0	0	4	0	3	0	0	0	0	0	0	0	0	0	3	4	0	7	3	4	4	0	7	1	100	57.1429	57.1429	0
120	0	7	0	0	0	2	9	2	8	2	1	0	0	0	0	3	2	4	8	10	6	18	10	14	11	0	24	1	75	58.3333	45.8333	0
121	0	7	0	0	0	3	12	2	11	0	0	0	0	0	0	0	2	3	11	12	5	23	13	15	15	0	28	1	82.1429	53.5714	53.5714	0
1	0	8	0	4	0	3	0	0	4	0	0	0	0	0	0	0	4	3	4	0	7	4	8	3	7	0	11	1	36.3636	27.2727	63.6364	0
2	0	8	0	5	0	3	0	0	1	1	0	0	0	0	0	1	5	4	1	0	9	1	6	4	8	0	10	1	10	40	80	0
3	0	8	0	6	7	6	0	2	1	0	0	0	0	0	0	0	8	6	8	0	14	8	16	6	19	0	22	1	36.3636	27.2727	86.3636	0
4	0	8	0	14	11	4	1	7	3	2	1	0	0	0	0	3	21	6	14	2	27	16	35	8	30	0	43	1	37.2093	18.6047	69.7674	0
5	0	8	0	5	6	0	0	0	0	1	0	0	0	0	0	1	5	1	6	0	6	6	11	1	11	0	12	1	50	8.33333	91.6667	0
6	0	8	0	18	49	34	16	1	1	1	1	0	0	0	0	2	19	35	50	17	54	67	69	52	117	0	121	1	55.3719	42.9752	96.6942	0
7	0	8	0	0	32	0	2	0	10	0	0	0	0	0	0	0	0	0	42	2	0	44	42	2	34	0	44	1	100	4.54545	77.2727	0
8	0	8	0	1	160	2	2	0	24	2	0	0	0	0	0	2	1	4	184	2	5	186	185	6	165	0	191	1	97.3822	3.14136	86.3874	0
9	0	8	0	15	35	28	2	3	3	0	0	0	0	0	0	0	18	28	38	2	46	40	56	30	80	0	86	1	46.5116	34.8837	93.0233	0
10	0	8	0	2	24	1	1	0	1	0	1	0	0	0	0	1	2	1	25	2	3	27	27	3	28	0	30	1	90	10	93.3333	0
11	0	8	0	7	57	2	3	5	19	5	2	0	0	0	0	7	12	7	76	5	19	81	88	12	69	0	100	1	81	12	69	0
12	0	8	0	6	84	1	5	0	46	0	6	0	0	0	0	6	6	1	130	11	7	141	136	12	96	0	148	1	95.2703	8.10811	64.8649	0
13	0	8	0	33	33	2	0	0	8	0	2	0	0	0	0	2	33	2	41	2	35	43	74	4	68	0	78	1	55.1282	5.12821	87.1795	0
14	0	8	0	26	53	6	0	3	33	1	1	0	0	0	0	2	29	7	86	1	36	87	115	8	85	0	123	1	70.7317	6.50407	69.1057	0
15	0	8	0	4	43	0	0	0	14	1	1	0	0	0	0	2	4	1	57	1	5	58	61	2	47	0	63	1	92.0635	3.1746	74.6032	0
16	0	8	0	22	80	16	16	3	43	2	3	0	0	0	0	5	25	18	123	19	43	142	148	37	134	0	185	1	76.7568	20	72.4324	0
17	0	8	0	9	69	1	3	0	31	3	1	0	0	0	0	4	9	4	100	4	13	104	109	8	82	0	117	1	88.8889	6.83761	70.0855	0
18	0	8	0	9	117	3	9	3	44	14	7	0	0	0	0	21	12	17	161	16	29	177	173	33	138	0	206	1	85.9223	16.0194	66.9903	0
19	0	8	0	10	11	3	1	2	10	9	5	0	0	0	0	14	12	12	21	6	24	27	33	18	25	0	51	1	52.9412	35.2941	49.0196	0
20	0	8	0	0	160	0	3	0	40	0	2	0	0	0	0	2	0	0	200	5	0	205	200	5	163	0	205	1	100	2.43902	79.5122	0
21	0	8	0	0	36	1	1	0	8	0	0	0	0	0	0	0	0	1	44	1	1	45	44	2	38	0	46	1	97.8261	4.34783	82.6087	0
22	0	8	0	1	37	0	4	0	3	3	0	0	0	0	0	3	1	3	40	4	4	44	41	7	42	0	48	1	91.6667	14.5833	87.5	0
23	0	8	0	0	31	0	3	2	9	0	0	0	0	0	0	0	2	0	40	3	2	43	42	3	34	0	45	1	95.5556	6.66667	75.5556	0
24	0	8	0	0	62	2	5	0	3	0	0	0	0	0	0	0	0	2	65	5	2	70	65	7	69	0	72	1	97.2222	9.72222	95.8333	0
25	0	8	0	0	43	0	1	0	5	0	1	0	0	0	0	1	0	0	48	2	0	50	48	2	44	0	50	1	100	4	88	0
26	0	8	0	5	43	1	3	2	5	0	3	0	0	0	0	3	7	1	48	6	8	54	55	7	52	0	62	1	87.0968	11.2903	83.871	0
27	0	8	0	2	25	0	0	1	5	1	0	0	0	0	0	1	3	1	30	0	4	30	33	1	27	0	34	1	88.2353	2.94118	79.4118	0
28	0	8	0	0	10	1	5	0	7	0	2	0	0	0	0	2	0	1	17	7	1	24	17	8	16	0	25	1	96	32	64	0
29	0	8	0	1	5	0	0	0	6	0	0	0	0	0	0	0	1	0	11	0	1	11	12	0	6	0	12	1	91.6667	0	50	0
30	0	8	0	0	58	0	4	1	10	0	0	0	0	0	0	0	1	0	68	4	1	72	69	4	62	0	73	1	98.6301	5.47945	84.9315	0
31	0	8	0	7	30	7	0	1	3	0	1	0	0	0	0	1	8	7	33	1	15	34	41	8	44	0	49	1	69.3878	16.3265	89.7959	0
32	0	8	0	3	12	0	2	1	3	0	0	0	0	0	0	0	4	0	15	2	4	17	19	2	17	0	21	1	80.9524	9.52381	80.9524	0
33	0	8	0	2	12	1	0	0	0	0	0	0	0	0	0	0	2	1	12	0	3	12	14	1	15	0	15	1	80	6.66667	100	0
34	0	8	0	6	40	5	14	0	13	1	5	0	0	0	0	6	6	6	53	19	12	72	59	25	65	0	84	1	85.7143	29.7619	77.381	0
35	0	8	0	0	29	1	5	1	12	0	0	0	0	0	0	0	1	1	41	5	2	46	42	6	35	0	48	1	95.8333	12.5	72.9167	0
36	0	8	0	2	12	2	10	2	13	0	0	0	0	0	0	0	4	2	25	10	6	35	29	12	26	0	41	1	85.3659	29.2683	63.4146	0
37	0	8	0	5	17	0	2	0	5	0	2	0	0	0	0	2	5	0	22	4	5	26	27	4	24	0	31	1	83.871	12.9032	77.4194	0
38	0	8	0	0	2	0	5	0	5	0	0	0	0	0	0	0	0	0	7	5	0	12	7	5	7	0	12	1	100	41.6667	58.3333	0
39	0	8	0	9	21	4	6	3	8	0	0	0	0	0	0	0	12	4	29	6	16	35	41	10	40	0	51	1	68.6275	19.6078	78.4314	0
40	0	8	0	6	29	3	1	0	1	0	0	0	0	0	0	0	6	3	30	1	9	31	36	4	39	0	40	1	77.5	10	97.5	0
41	0	8	0	0	32	1	3	1	5	0	0	0	0	0	0	0	1	1	37	3	2	40	38	4	36	0	42	1	95.2381	9.52381	85.7143	0
42	0	8	0	5	13	0	1	0	4	0	0	0	0	0	0	0	5	0	17	1	5	18	22	1	19	0	23	1	78.2609	4.34783	82.6087	0
43	0	8	0	0	18	0	1	0	1	0	1	0	0	0	0	1	0	0	19	2	0	21	19	2	19	0	21	1	100	9.52381	90.4762	0
44	0	8	0	1	16	0	1	0	1	0	0	0	0	0	0	0	1	0	17	1	1	18	18	1	18	0	19	1	94.7368	5.26316	94.7368	0
45	0	8	0	0	26	0	0	0	1	0	0	0	0	0	0	0	0	0	27	0	0	27	27	0	26	0	27	1	100	0	96.2963	0
46	0	8	0	1	31	0	2	0	5	0	0	0	0	0	0	0	1	0	36	2	1	38	37	2	34	0	39	1	97.4359	5.12821	87.1795	0
47	0	8	0	4	7	0	1	0	7	0	0	0	0	0	0	0	4	0	14	1	4	15	18	1	12	0	19	1	78.9474	5.26316	63.1579	0
48	0	8	0	0	4	0	7	2	5	0	0	0	0	0	0	0	2	0	9	7	2	16	11	7	11	0	18	1	88.8889	38.8889	61.1111	0
49	0	8	0	2	2	1	9	1	12	0	0	0	0	0	0	0	3	1	14	9	4	23	17	10	14	0	27	1	85.1852	37.037	51.8519	0
50	0	8	0	4	2	0	2	0	3	0	0	0	0	0	0	0	4	0	5	2	4	7	9	2	8	0	11	1	63.6364	18.1818	72.7273	0
51	0	8	0	1	1	0	0	0	3	0	0	0	0	0	0	0	1	0	4	0	1	4	5	0	2	0	5	1	80	0	40	0
52	0	8	0	1	2	0	1	0	3	0	0	0	0	0	0	0	1	0	5	1	1	6	6	1	4	0	7	1	85.7143	14.2857	57.1429	0
53	0	8	0	0	13	0	0	0	0	0	0	0	0	0	0	0	0	0	13	0	0	13	13	0	13	0	13	1	100	0	100	0
54	0	8	0	2	5	0	2	0	2	0	0	0	0	0	0	0	2	0	7	2	2	9	9	2	9	0	11	1	81.8182	18.1818	81.8182	0
55	0	8	0	1	3	2	0	1	0	0	1	0	0	0	0	1	2	2	3	1	4	4	5	3	6	0	8	1	50	37.5	75	0
56	0	8	0	2	5	0	3	0	3	0	1	0	0	0	0	1	2	0	8	4	2	12	10	4	10	0	14	1	85.7143	28.5714	71.4286	0
57	0	8	0	0	7	0	1	0	3	0	0	0	0	0	0	0	0	0	10	1	0	11	10	1	8	0	11	1	100	9.09091	72.7273	0
58	0	8	0	0	6	1	4	1	3	0	0	0	0	0	0	0	1	1	9	4	2	13	10	5	11	0	15	1	86.6667	33.3333	73.3333	0
59	0	8	0	1	3	3	4	5	8	0	0	0	0	0	0	0	6	3	11	4	9	15	17	7	11	0	24	1	62.5	29.1667	45.8333	0
60	0	8	0	0	11	0	0	0	5	0	0	0	0	0	0	0	0	0	16	0	0	16	16	0	11	0	16	1	100	0	68.75	0
61	0	8	0	0	2	0	1	0	2	0	0	0	0	0	0	0	0	0	4	1	0	5	4	1	3	0	5	1	100	20	60	0
62	0	8	0	4	3	0	2	0	2	0	0	0	0	0	0	0	4	0	5	2	4	7	9	2	9	0	11	1	63.6364	18.1818	81.8182	0
63	0	8	0	0	5	0	0	0	0	0	0	0	0	0	0	0	0	0	5	0	0	5	5	0	5	0	5	1	100	0	100	0
64	0	8	0	0	8	0	0	0	0	0	0	0	0	0	0	0	0	0	8	0	0	8	8	0	8	0	8	1	100	0	100	0
65	0	8	0	1	5	1	6	1	8	0	0	0	0	0	0	0	2	1	13	6	3	19	15	7	13	0	22	1	86.3636	31.8182	59.0909	0
66	0	8	0	0	6	0	8	0	9	1	0	0	0	0	0	1	0	1	15	8	1	23	15	9	14	0	24	1	95.8333	37.5	58.3333	0
67	0	8	0	2	25	0	7	0	9	0	1	0	0	0	0	1	2	0	34	8	2	42	36	8	34	0	44	1	95.4545	18.1818	77.2727	0
68	0	8	0	1	4	0	6	0	16	0	0	0	0	0	0	0	1	0	20	6	1	26	21	6	11	0	27	1	96.2963	22.2222	40.7407	0
69	0	8	0	0	11	1	2	0	5	0	0	0	0	0	0	0	0	1	16	2	1	18	16	3	14	0	19	1	94.7368	15.7895	73.6842	0
70	0	8	0	0	6	0	0	0	0	1	0	0	0	0	0	1	0	1	6	0	1	6	6	1	6	0	7	1	85.7143	14.2857	85.7143	0
71	0	8	0	2	15	2	1	1	2	0	0	0	0	0	0	0	3	2	17	1	5	18	20	3	20	0	23	1	78.2609	13.0435	86.9565	0
72	0	8	0	0	14	0	1	0	2	0	0	0	0	0	0	0	0	0	16	1	0	17	16	1	15	0	17	1	100	5.88235	88.2353	0
73	0	8	0	0	14	0	0	1	1	0	0	0	0	0	0	0	1	0	15	0	1	15	16	0	14	0	16	1	93.75	0	87.5	0
74	0	8	0	0	27	0	0	0	3	0	1	0	0	0	0	1	0	0	30	1	0	31	30	1	27	0	31	1	100	3.22581	87.0968	0
75	0	8	0	2	7	0	1	1	5	0	0	0	0	0	0	0	3	0	12	1	3	13	15	1	10	0	16	1	81.25	6.25	62.5	0
76	0	8	0	0	16	0	3	0	6	0	0	0	0	0	0	0	0	0	22	3	0	25	22	3	19	0	25	1	100	12	76	0
77	0	8	0	0	10	1	1	0	9	0	0	0	0	0	0	0	0	1	19	1	1	20	19	2	12	0	21	1	95.2381	9.52381	57.1429	0
78	0	8	0	6	1	1	1	3	18	0	1	0	0	0	0	1	9	1	19	2	10	21	28	3	9	0	31	1	67.7419	9.67742	29.0323	0
79	0	8	0	4	11	0	0	0	5	0	0	0	0	0	0	0	4	0	16	0	4	16	20	0	15	0	20	1	80	0	75	0
80	0	8	0	2	25	0	0	0	5	0	0	0	0	0	0	0	2	0	30	0	2	30	32	0	27	0	32	1	93.75	0	84.375	0
81	0	8	0	0	24	1	2	0	2	0	0	0	0	0	0	0	0	1	26	2	1	28	26	3	27	0	29	1	96.5517	10.3448	93.1034	0
82	0	8	0	3	16	0	1	2	3	0	0	0	0	0	0	0	5	0	19	1	5	20	24	1	20	0	25	1	80	4	80	0
83	0	8	0	0	25	0	0	0	3	0	0	0	0	0	0	0	0	0	28	0	0	28	28	0	25	0	28	1	100	0	89.2857	0
84	0	8	0	4	35	0	0	0	7	0	0	0	0	0	0	0	4	0	42	0	4	42	46	0	39	0	46	1	91.3043	0	84.7826	0
85	0	8	0	0	7	0	0	0	5	0	0	0	0	0	0	0	0	0	12	0	0	12	12	0	7	0	12	1	100	0	58.3333	0
86	0	8	0	0	4	0	4	0	4	0	0	0	0	0	0	0	0	0	8	4	0	12	8	4	8	0	12	1	100	33.3333	66.6667	0
87	0	8	0	0	3	0	0	0	4	0	1	0	0	0	0	1	0	0	7	1	0	8	7	1	3	0	8	1	100	12.5	37.5	0
88	0	8	0	0	14	0	4	0	9	0	0	0	0	0	0	0	0	0	23	4	0	27	23	4	18	0	27	1	100	14.8148	66.6667	0
89	0	8	0	0	1	0	3	0	3	0	0	0	0	0	0	0	0	0	4	3	0	7	4	3	4	0	7	1	100	42.8571	57.1429	0
90	0	8	0	0	41	1	3	0	13	2	3	0	0	0	0	5	0	3	54	6	3	60	54	9	45	0	63	1	95.2381	14.2857	71.4286	0
91	0	8	0	2	39	0	4	0	26	0	0	0	0	0	0	0	2	0	65	4	2	69	67	4	45	0	71	1	97.1831	5.6338	63.3803	0
92	0	8	0	1	12	0	1	0	2	0	0	0	0	0	0	0	1	0	14	1	1	15	15	1	14	0	16	1	93.75	6.25	87.5	0
93	0	8	0	0	18	0	2	0	2	0	0	0	0	0	0	0	0	0	20	2	0	22	20	2	20	0	22	1	100	9.09091	90.9091	0
94	0	8	0	0	17	0	8	0	16	0	0	0	0	0	0	0	0	0	33	8	0	41	33	8	25	0	41	1	100	19.5122	60.9756	0
95	0	8	0	1	3	0	2	1	6	0	0	0	0	0	0	0	2	0	9	2	2	11	11	2	6	0	13	1	84.6154	15.3846	46.1538	0
96	0	8	0	0	9	0	5	0	7	0	1	0	0	0	0	1	0	0	16	6	0	22	16	6	14	0	22	1	100	27.2727	63.6364	0
97	0	8	0	0	24	0	1	0	9	0	0	0	0	0	0	0	0	0	33	1	0	34	33	1	25	0	34	1	100	2.94118	73.5294	0
98	0	8	0	0	6	0	3	1	7	0	1	0	0	0	0	1	1	0	13	4	1	17	14	4	9	0	18	1	94.4444	22.2222	50	0
99	0	8	0	0	9	0	2	0	5	0	1	0	0	0	0	1	0	0	14	3	0	17	14	3	11	0	17	1	100	17.6471	64.7059	0
100	0	8	0	8	12	1	1	1	1	0	0	0	0	0	0	0	9	1	13	1	10	14	22	2	22	0	24	1	58.3333	8.33333	91.6667	0
101	0	8	0	0	20	0	1	0	11	0	0	0	0	0	0	0	0	0	31	1	0	32	31	1	21	0	32	1	100	3.125	65.625	0
102	0	8	0	0	18	0	0	0	6	0	0	0	0	0	0	0	0	0	24	0	0	24	24	0	18	0	24	1	100	0	75	0
103	0	8	0	0	48	2	4	0	6	0	0	0	0	0	0	0	0	2	54	4	2	58	54	6	54	0	60	1	96.6667	10	90	0
104	0	8	0	0	21	0	0	0	5	0	0	0	0	0	0	0	0	0	26	0	0	26	26	0	21	0	26	1	100	0	80.7692	0
105	0	8	0	11	83	0	3	0	11	0	0	0	0	0	0	0	11	0	94	3	11	97	105	3	97	0	108	1	89.8148	2.77778	89.8148	0
106	0	8	0	0	15	0	18	2	44	0	0	0	0	0	0	0	2	0	59	18	2	77	61	18	33	0	79	1	97.4684	22.7848	41.7722	0
107	0	8	0	6	17	0	2	0	13	0	0	0	0	0	0	0	6	0	30	2	6	32	36	2	25	0	38	1	84.2105	5.26316	65.7895	0
108	0	8	0	0	28	0	2	0	10	0	0	0	0	0	0	0	0	0	38	2	0	40	38	2	30	0	40	1	100	5	75	0
109	0	8	0	12	28	0	1	1	3	0	0	0	0	0	0	0	13	0	31	1	13	32	44	1	41	0	45	1	71.1111	2.22222	91.1111	0
110	0	8	0	0	8	0	0	0	0	0	0	0	0	0	0	0	0	0	8	0	0	8	8	0	8	0	8	1	100	0	100	0
111	0	8	0	2	7	0	2	0	5	0	0	0	0	0	0	0	2	0	12	2	2	14	14	2	11	0	16	1	87.5	12.5	68.75	0
112	0	8	0	0	14	0	1	0	5	0	1	0	0	0	0	1	0	0	19	2	0	21	19	2	15	0	21	1	100	9.52381	71.4286	0
113	0	8	0	1	14	0	2	0	2	0	0	0	0	0	0	0	1	0	16	2	1	18	17	2	17	0	19	1	94.7368	10.5263	89.4737	0
114	0	8	0	0	9	4	1	2	2	0	0	0	0	0	0	0	2	4	11	1	6	12	13	5	14	0	18	1	66.6667	27.7778	77.7778	0
115	0	8	0	0	9	0	8	0	10	0	1	0	0	0	0	1	0	0	19	9	0	28	19	9	17	0	28	1	100	32.1429	60.7143	0
116	0	8	0	0	14	1	16	1	23	0	1	0	0	0	0	1	1	1	37	17	2	54	38	18	31	0	56	1	96.4286	32.1429	55.3571	0
117	0	8	0	0	5	0	2	0	2	0	0	0	0	0	0	0	0	0	7	2	0	9	7	2	7	0	9	1	100	22.2222	77.7778	0
118	0	8	0	0	9	1	12	0	13	4	0	0	0	0	0	4	0	5	22	12	5	34	22	17	22	0	39	1	87.1795	43.5897	56.4103	0
119	0	8	0	0	25	0	10	0	23	0	7	0	0	0	0	7	0	0	48	17	0	65	48	17	35	0	65	1	100	26.1538	53.8462	0
120	0	8	0	0	16	4	7	3	29	1	1	0	0	0	0	2	3	5	45	8	8	53	48	13	27	0	61	1	86.8852	21.3115	44.2623	0
121	0	8	0	0	24	3	3	2	19	0	0	0	0	0	0	0	2	3	43	3	5	46	45	6	30	0	51	1	90.1961	11.7647	58.8235	0
1	0	9	0	3	3	0	0	0	0	0	0	0	0	0	0	0	3	0	3	0	3	3	6	0	6	0	6	1	50	0	100	0
2	0	9	0	0	0	2	0	0	0	0	0	0	0	0	0	0	0	2	0	0	2	0	0	2	2	0	2	1	0	100	100	0
3	0	9	0	1	1	8	0	0	3	0	1	0	0	0	0	1	1	8	4	1	9	5	5	9	10	0	14	1	35.7143	64.2857	71.4286	0
4	0	9	0	0	0	1	0	0	2	1	0	0	0	0	0	1	0	2	2	0	2	2	2	2	1	0	4	1	50	50	25	0
5	0	9	0	2	11	4	2	1	4	1	1	0	0	0	0	2	3	5	15	3	8	18	18	8	19	0	26	1	69.2308	30.7692	73.0769	0
6	0	9	0	0	20	1	21	0	8	0	0	0	0	0	0	0	0	1	28	21	1	49	28	22	42	0	50	1	98	44	84	0
7	0	9	0	2	10	14	23	5	20	4	3	0	0	0	0	7	7	18	30	26	25	56	37	44	49	0	81	1	69.1358	54.321	60.4938	0
8	0	9	0	2	31	0	16	0	25	0	0	0	0	0	0	0	2	0	56	16	2	72	58	16	49	0	74	1	97.2973	21.6216	66.2162	0
9	0	9	0	5	8	3	21	0	14	1	7	0	0	0	0	8	5	4	22	28	9	50	27	32	37	0	59	1	84.7458	54.2373	62.7119	0
10	0	9	0	8	8	45	9	6	10	31	0	0	0	0	0	31	14	76	18	9	90	27	32	85	70	0	117	1	23.0769	72.6496	59.8291	0
11	0	9	0	4	18	3	9	1	17	2	1	0	0	0	0	3	5	5	35	10	10	45	40	15	34	0	55	1	81.8182	27.2727	61.8182	0
12	0	9	0	40	20	7	6	7	19	12	2	0	0	0	0	14	47	19	39	8	66	47	86	27	73	0	113	1	41.5929	23.8938	64.6018	0
13	0	9	0	20	38	9	33	19	41	4	1	0	0	0	0	5	39	13	79	34	52	113	118	47	100	0	165	1	68.4848	28.4848	60.6061	0
14	0	9	0	18	12	15	10	2	7	0	0	0	0	0	0	0	20	15	19	10	35	29	39	25	55	0	64	1	45.3125	39.0625	85.9375	0
15	0	9	0	8	36	8	8	7	20	1	0	0	0	0	0	1	15	9	56	8	24	64	71	17	60	0	88	1	72.7273	19.3182	68.1818	0
16	0	9	0	15	5	4	4	3	14	5	1	0	0	0	0	6	18	9	19	5	27	24	37	14	28	0	51	1	47.0588	27.451	54.902	0
17	0	9	0	9	56	5	50	0	53	3	1	0	0	0	0	4	9	8	109	51	17	160	118	59	120	0	177	1	90.3955	33.3333	67.7966	0
18	0	9	0	7	32	6	21	2	24	3	0	0	0	0	0	3	9	9	56	21	18	77	65	30	66	0	95	1	81.0526	31.5789	69.4737	0
19	0	9	0	3	34	1	1	3	2	0	1	0	0	0	0	1	6	1	36	2	7	38	42	3	39	0	45	1	84.4444	6.66667	86.6667	0
20	0	9	0	10	31	6	7	19	13	13	5	0	0	0	0	18	29	19	44	12	48	56	73	31	54	0	104	1	53.8462	29.8077	51.9231	0
21	0	9	0	0	83	1	4	0	5	0	0	0	0	0	0	0	0	1	88	4	1	92	88	5	88	0	93	1	98.9247	5.37634	94.6237	0
22	0	9	0	0	39	2	20	2	16	0	2	0	0	0	0	2	2	2	55	22	4	77	57	24	61	0	81	1	95.0617	29.6296	75.3086	0
23	0	9	0	0	41	3	17	0	5	1	0	0	0	0	0	1	0	4	46	17	4	63	46	21	61	0	67	1	94.0299	31.3433	91.0448	0
24	0	9	0	0	66	0	5	0	6	0	0	0	0	0	0	0	0	0	72	5	0	77	72	5	71	0	77	1	100	6.49351	92.2078	0
25	0	9	0	0	53	2	13	0	6	0	0	0	0	0	0	0	0	2	59	13	2	72	59	15	68	0	74	1	97.2973	20.2703	91.8919	0
26	0	9	0	0	56	0	5	0	6	0	1	0	0	0	0	1	0	0	62	6	0	68	62	6	61	0	68	1	100	8.82353	89.7059	0
27	0	9	0	0	50	0	12	0	21	0	3	0	0	0	0	3	0	0	71	15	0	86	71	15	62	0	86	1	100	17.4419	72.093	0
28	0	9	0	0	9	0	5	0	6	0	0	0	0	0	0	0	0	0	15	5	0	20	15	5	14	0	20	1	100	25	70	0
29	0	9	0	4	17	3	5	2	2	1	2	0	0	0	0	3	6	4	19	7	10	26	25	11	29	0	36	1	72.2222	30.5556	80.5556	0
30	0	9	0	5	28	0	4	0	10	0	0	0	0	0	0	0	5	0	38	4	5	42	43	4	37	0	47	1	89.3617	8.51064	78.7234	0
31	0	9	0	4	72	0	19	0	30	1	0	0	0	0	0	1	4	1	102	19	5	121	106	20	95	0	126	1	96.0317	15.873	75.3968	0
32	0	9	0	2	10	1	4	1	4	1	0	0	0	0	0	1	3	2	14	4	5	18	17	6	17	0	23	1	78.2609	26.087	73.913	0
33	0	9	0	0	8	0	0	0	1	0	0	0	0	0	0	0	0	0	9	0	0	9	9	0	8	0	9	1	100	0	88.8889	0
34	0	9	0	0	29	0	2	0	11	0	0	0	0	0	0	0	0	0	40	2	0	42	40	2	31	0	42	1	100	4.7619	73.8095	0
35	0	9	0	14	35	3	3	0	5	0	0	0	0	0	0	0	14	3	40	3	17	43	54	6	55	0	60	1	71.6667	10	91.6667	0
36	0	9	0	0	19	1	9	0	9	0	0	0	0	0	0	0	0	1	28	9	1	37	28	10	29	0	38	1	97.3684	26.3158	76.3158	0
37	0	9	0	0	7	0	7	1	9	1	0	0	0	0	0	1	1	1	16	7	2	23	17	8	14	0	25	1	92	32	56	0
38	0	9	0	0	9	0	1	0	1	0	0	0	0	0	0	0	0	0	10	1	0	11	10	1	10	0	11	1	100	9.09091	90.9091	0
39	0	9	0	0	21	1	0	1	1	0	0	0	0	0	0	0	1	1	22	0	2	22	23	1	22	0	24	1	91.6667	4.16667	91.6667	0
40	0	9	0	0	27	1	3	0	4	0	0	0	0	0	0	0	0	1	31	3	1	34	31	4	31	0	35	1	97.1429	11.4286	88.5714	0
41	0	9	0	0	13	0	0	0	2	0	0	0	0	0	0	0	0	0	15	0	0	15	15	0	13	0	15	1	100	0	86.6667	0
42	0	9	0	2	5	2	1	2	0	0	0	0	0	0	0	0	4	2	5	1	6	6	9	3	10	0	12	1	50	25	83.3333	0
43	0	9	0	0	14	2	2	1	2	0	1	0	0	0	0	1	1	2	16	3	3	19	17	5	18	0	22	1	86.3636	22.7273	81.8182	0
44	0	9	0	1	20	0	1	2	1	0	0	0	0	0	0	0	3	0	21	1	3	22	24	1	22	0	25	1	88	4	88	0
45	0	9	0	0	8	0	5	0	4	0	1	0	0	0	0	1	0	0	12	6	0	18	12	6	13	0	18	1	100	33.3333	72.2222	0
46	0	9	0	0	1	0	2	0	2	0	0	0	0	0	0	0	0	0	3	2	0	5	3	2	3	0	5	1	100	40	60	0
47	0	9	0	0	0	0	7	0	8	0	0	0	0	0	0	0	0	0	8	7	0	15	8	7	7	0	15	1	100	46.6667	46.6667	0
48	0	9	0	0	1	0	3	0	1	0	0	0	0	0	0	0	0	0	2	3	0	5	2	3	4	0	5	1	100	60	80	0
49	0	9	0	0	10	0	8	0	9	0	0	0	0	0	0	0	0	0	19	8	0	27	19	8	18	0	27	1	100	29.6296	66.6667	0
50	0	9	0	0	4	0	2	0	4	0	0	0	0	0	0	0	0	0	8	2	0	10	8	2	6	0	10	1	100	20	60	0
51	0	9	0	0	2	0	3	0	3	0	0	0	0	0	0	0	0	0	5	3	0	8	5	3	5	0	8	1	100	37.5	62.5	0
52	0	9	0	3	12	1	2	1	3	0	0	0	0	0	0	0	4	1	15	2	5	17	19	3	18	0	22	1	77.2727	13.6364	81.8182	0
53	0	9	0	0	8	0	0	0	1	0	0	0	0	0	0	0	0	0	9	0	0	9	9	0	8	0	9	1	100	0	88.8889	0
54	0	9	0	2	19	0	3	0	3	0	0	0	0	0	0	0	2	0	22	3	2	25	24	3	24	0	27	1	92.5926	11.1111	88.8889	0
55	0	9	0	0	1	0	0	0	1	0	0	0	0	0	0	0	0	0	2	0	0	2	2	0	1	0	2	1	100	0	50	0
56	0	9	0	0	1	1	2	0	2	0	0	0	0	0	0	0	0	1	3	2	1	5	3	3	4	0	6	1	83.3333	50	66.6667	0
57	0	9	0	0	6	0	2	0	5	0	1	0	0	0	0	1	0	0	11	3	0	14	11	3	8	0	14	1	100	21.4286	57.1429	0
58	0	9	0	3	1	0	1	0	1	1	0	0	0	0	0	1	3	1	2	1	4	3	5	2	5	0	7	1	42.8571	28.5714	71.4286	0
59	0	9	0	0	3	0	2	0	2	0	0	0	0	0	0	0	0	0	5	2	0	7	5	2	5	0	7	1	100	28.5714	71.4286	0
60	0	9	0	1	3	1	1	1	2	0	0	0	0	0	0	0	2	1	5	1	3	6	7	2	6	0	9	1	66.6667	22.2222	66.6667	0
61	0	9	0	0	2	0	0	0	0	0	0	0	0	0	0	0	0	0	2	0	0	2	2	0	2	0	2	1	100	0	100	0
62	0	9	0	0	2	1	1	0	1	0	0	0	0	0	0	0	0	1	3	1	1	4	3	2	4	0	5	1	80	40	80	0
63	0	9	0	0	1	1	2	0	2	0	0	0	0	0	0	0	0	1	3	2	1	5	3	3	4	0	6	1	83.3333	50	66.6667	0
64	0	9	0	0	1	1	2	1	2	0	0	0	0	0	0	0	1	1	3	2	2	5	4	3	4	0	7	1	71.4286	42.8571	57.1429	0
65	0	9	0	0	6	0	3	0	3	1	0	0	0	0	0	1	0	1	9	3	1	12	9	4	9	0	13	1	92.3077	30.7692	69.2308	0
66	0	9	0	0	1	0	10	0	12	0	0	0	0	0	0	0	0	0	13	10	0	23	13	10	11	0	23	1	100	43.4783	47.8261	0
67	0	9	0	1	16	0	1	0	4	0	0	0	0	0	0	0	1	0	20	1	1	21	21	1	18	0	22	1	95.4545	4.54545	81.8182	0
68	0	9	0	0	8	0	1	0	2	0	0	0	0	0	0	0	0	0	10	1	0	11	10	1	9	0	11	1	100	9.09091	81.8182	0
69	0	9	0	0	4	1	3	2	15	0	1	0	0	0	0	1	2	1	19	4	3	23	21	5	8	0	26	1	88.4615	19.2308	30.7692	0
70	0	9	0	2	7	0	1	0	1	0	0	0	0	0	0	0	2	0	8	1	2	9	10	1	10	0	11	1	81.8182	9.09091	90.9091	0
71	0	9	0	0	8	0	0	0	2	0	0	0	0	0	0	0	0	0	10	0	0	10	10	0	8	0	10	1	100	0	80	0
72	0	9	0	0	21	0	6	0	6	0	1	0	0	0	0	1	0	0	27	7	0	34	27	7	27	0	34	1	100	20.5882	79.4118	0
73	0	9	0	0	8	6	22	4	7	1	4	0	0	0	0	5	4	7	15	26	11	41	19	33	36	0	52	1	78.8462	63.4615	69.2308	0
74	0	9	0	1	3	0	2	0	4	0	0	0	0	0	0	0	1	0	7	2	1	9	8	2	6	0	10	1	90	20	60	0
75	0	9	0	0	8	0	1	0	3	0	1	0	0	0	0	1	0	0	11	2	0	13	11	2	9	0	13	1	100	15.3846	69.2308	0
76	0	9	0	0	9	0	1	0	4	0	0	0	0	0	0	0	0	0	13	1	0	14	13	1	10	0	14	1	100	7.14286	71.4286	0
77	0	9	0	0	0	0	7	0	9	0	0	0	0	0	0	0	0	0	9	7	0	16	9	7	7	0	16	1	100	43.75	43.75	0
78	0	9	0	0	10	0	2	0	4	0	0	0	0	0	0	0	0	0	14	2	0	16	14	2	12	0	16	1	100	12.5	75	0
79	0	9	0	0	11	0	2	0	4	0	0	0	0	0	0	0	0	0	15	2	0	17	15	2	13	0	17	1	100	11.7647	76.4706	0
80	0	9	0	0	11	0	2	0	2	0	0	0	0	0	0	0	0	0	13	2	0	15	13	2	13	0	15	1	100	13.3333	86.6667	0
81	0	9	0	0	15	0	0	0	3	0	0	0	0	0	0	0	0	0	18	0	0	18	18	0	15	0	18	1	100	0	83.3333	0
82	0	9	0	0	14	0	2	1	2	0	0	0	0	0	0	0	1	0	16	2	1	18	17	2	16	0	19	1	94.7368	10.5263	84.2105	0
83	0	9	0	3	8	0	0	1	1	0	0	0	0	0	0	0	4	0	9	0	4	9	13	0	11	0	13	1	69.2308	0	84.6154	0
84	0	9	0	0	5	0	0	0	2	0	0	0	0	0	0	0	0	0	7	0	0	7	7	0	5	0	7	1	100	0	71.4286	0
85	0	9	0	0	12	0	4	0	9	0	1	0	0	0	0	1	0	0	21	5	0	26	21	5	16	0	26	1	100	19.2308	61.5385	0
86	0	9	0	0	4	0	5	0	5	0	0	0	0	0	0	0	0	0	9	5	0	14	9	5	9	0	14	1	100	35.7143	64.2857	0
87	0	9	0	0	3	1	9	1	7	1	2	0	0	0	0	3	1	2	10	11	3	21	11	13	13	0	24	1	87.5	54.1667	54.1667	0
88	0	9	0	2	5	3	9	1	10	0	1	0	0	0	0	1	3	3	15	10	6	25	18	13	19	0	31	1	80.6452	41.9355	61.2903	0
89	0	9	0	0	7	0	3	0	7	0	1	0	0	0	0	1	0	0	14	4	0	18	14	4	10	0	18	1	100	22.2222	55.5556	0
90	0	9	0	2	8	8	10	5	15	3	0	0	0	0	0	3	7	11	23	10	18	33	30	21	28	0	51	1	64.7059	41.1765	54.902	0
91	0	9	0	0	5	0	8	0	8	0	0	0	0	0	0	0	0	0	13	8	0	21	13	8	13	0	21	1	100	38.0952	61.9048	0
92	0	9	0	4	10	0	2	0	7	0	0	0	0	0	0	0	4	0	17	2	4	19	21	2	16	0	23	1	82.6087	8.69565	69.5652	0
93	0	9	0	0	10	3	7	0	4	0	0	0	0	0	0	0	0	3	14	7	3	21	14	10	20	0	24	1	87.5	41.6667	83.3333	0
94	0	9	0	0	8	0	4	0	5	0	0	0	0	0	0	0	0	0	13	4	0	17	13	4	12	0	17	1	100	23.5294	70.5882	0
95	0	9	0	0	4	0	7	0	4	0	0	0	0	0	0	0	0	0	8	7	0	15	8	7	11	0	15	1	100	46.6667	73.3333	0
96	0	9	0	0	15	0	10	0	16	0	0	0	0	0	0	0	0	0	31	10	0	41	31	10	25	0	41	1	100	24.3902	60.9756	0
97	0	9	0	0	2	0	6	0	7	0	0	0	0	0	0	0	0	0	9	6	0	15	9	6	8	0	15	1	100	40	53.3333	0
98	0	9	0	0	14	1	9	1	10	0	1	0	0	0	0	1	1	1	24	10	2	34	25	11	24	0	36	1	94.4444	30.5556	66.6667	0
99	0	9	0	0	8	2	1	3	0	0	0	0	0	0	0	0	3	2	8	1	5	9	11	3	11	0	14	1	64.2857	21.4286	78.5714	0
100	0	9	0	1	4	0	3	0	6	0	0	0	0	0	0	0	1	0	10	3	1	13	11	3	8	0	14	1	92.8571	21.4286	57.1429	0
101	0	9	0	0	12	0	1	2	3	0	0	0	0	0	0	0	2	0	15	1	2	16	17	1	13	0	18	1	88.8889	5.55556	72.2222	0
102	0	9	0	3	8	0	2	1	6	0	1	0	0	0	0	1	4	0	14	3	4	17	18	3	13	0	21	1	80.9524	14.2857	61.9048	0
103	0	9	0	20	35	5	5	6	9	0	0	0	0	0	0	0	26	5	44	5	31	49	70	10	65	0	80	1	61.25	12.5	81.25	0
104	0	9	0	0	17	0	1	0	2	0	0	0	0	0	0	0	0	0	19	1	0	20	19	1	18	0	20	1	100	5	90	0
105	0	9	0	0	18	0	3	0	5	0	0	0	0	0	0	0	0	0	23	3	0	26	23	3	21	0	26	1	100	11.5385	80.7692	0
106	0	9	0	0	56	0	9	0	13	0	2	0	0	0	0	2	0	0	69	11	0	80	69	11	65	0	80	1	100	13.75	81.25	0
107	0	9	0	0	6	1	6	0	12	0	0	0	0	0	0	0	0	1	18	6	1	24	18	7	13	0	25	1	96	28	52	0
108	0	9	0	0	11	0	3	0	6	0	0	0	0	0	0	0	0	0	17	3	0	20	17	3	14	0	20	1	100	15	70	0
109	0	9	0	0	23	1	5	3	8	0	0	0	0	0	0	0	3	1	31	5	4	36	34	6	29	0	40	1	90	15	72.5	0
110	0	9	0	3	8	0	0	0	0	0	0	0	0	0	0	0	3	0	8	0	3	8	11	0	11	0	11	1	72.7273	0	100	0
111	0	9	0	1	5	0	2	0	3	0	0	0	0	0	0	0	1	0	8	2	1	10	9	2	8	0	11	1	90.9091	18.1818	72.7273	0
112	0	9	0	2	2	0	0	0	0	0	0	0	0	0	0	0	2	0	2	0	2	2	4	0	4	0	4	1	50	0	100	0
113	0	9	0	0	17	0	7	0	9	0	0	0	0	0	0	0	0	0	26	7	0	33	26	7	24	0	33	1	100	21.2121	72.7273	0
114	0	9	0	0	10	1	1	0	5	0	0	0	0	0	0	0	0	1	15	1	1	16	15	2	12	0	17	1	94.1176	11.7647	70.5882	0
115	0	9	0	0	1	1	4	0	2	0	0	0	0	0	0	0	0	1	3	4	1	7	3	5	6	0	8	1	87.5	62.5	75	0
116	0	9	0	0	2	0	2	0	2	0	0	0	0	0	0	0	0	0	4	2	0	6	4	2	4	0	6	1	100	33.3333	66.6667	0
117	0	9	0	0	7	0	3	0	6	0	1	0	0	0	0	1	0	0	13	4	0	17	13	4	10	0	17	1	100	23.5294	58.8235	0
118	0	9	0	0	1	3	16	1	16	0	1	0	0	0	0	1	1	3	17	17	4	34	18	20	20	0	38	1	89.4737	52.6316	52.6316	0
119	0	9	0	0	10	0	10	0	14	0	0	0	0	0	0	0	0	0	24	10	0	34	24	10	20	0	34	1	100	29.4118	58.8235	0
120	0	9	0	0	30	0	14	0	18	0	1	0	0	0	0	1	0	0	48	15	0	63	48	15	44	0	63	1	100	23.8095	69.8413	0
121	0	9	0	0	25	0	11	0	18	3	0	0	0	0	0	3	0	3	43	11	3	54	43	14	36	0	57	1	94.7368	24.5614	63.1579	0
1	0	10	0	3	1	2	0	0	0	0	0	0	0	0	0	0	3	2	1	0	5	1	4	2	6	0	6	1	16.6667	33.3333	100	0
2	0	10	0	0	1	0	0	0	1	0	0	0	0	0	0	0	0	0	2	0	0	2	2	0	1	0	2	1	100	0	50	0
3	0	10	0	2	1	4	3	0	4	0	0	0	0	0	0	0	2	4	5	3	6	8	7	7	10	0	14	1	57.1429	50	71.4286	0
4	0	10	0	0	1	0	0	1	1	0	0	0	0	0	0	0	1	0	2	0	1	2	3	0	1	0	3	1	66.6667	0	33.3333	0
5	0	10	0	0	2	0	3	1	2	4	0	0	0	0	0	4	1	4	4	3	5	7	5	7	5	0	12	1	58.3333	58.3333	41.6667	0
6	0	10	0	0	4	25	27	3	15	3	7	0	0	0	0	10	3	28	19	34	31	53	22	62	56	0	84	1	63.0952	73.8095	66.6667	0
7	0	10	0	0	1	0	40	0	40	0	11	0	0	0	0	11	0	0	41	51	0	92	41	51	41	0	92	1	100	55.4348	44.5652	0
8	0	10	0	3	15	21	29	3	24	6	9	0	0	0	0	15	6	27	39	38	33	77	45	65	68	0	110	1	70	59.0909	61.8182	0
9	0	10	0	0	13	1	19	0	12	0	1	0	0	0	0	1	0	1	25	20	1	45	25	21	33	0	46	1	97.8261	45.6522	71.7391	0
10	0	10	0	0	5	13	61	1	69	11	18	0	0	0	0	29	1	24	74	79	25	153	75	103	79	0	178	1	85.9551	57.8652	44.382	0
11	0	10	0	7	35	4	18	0	23	0	0	0	0	0	0	0	7	4	58	18	11	76	65	22	64	0	87	1	87.3563	25.2874	73.5632	0
12	0	10	0	13	18	9	4	5	4	2	1	0	0	0	0	3	18	11	22	5	29	27	40	16	44	0	56	1	48.2143	28.5714	78.5714	0
13	0	10	0	13	27	3	3	0	1	17	2	0	0	0	0	19	13	20	28	5	33	33	41	25	46	0	66	1	50	37.8788	69.697	0
14	0	10	0	6	2	40	32	27	31	45	7	0	0	0	0	52	33	85	33	39	118	72	66	124	80	0	190	1	37.8947	65.2632	42.1053	0
15	0	10	0	6	11	5	5	1	28	0	1	0	0	0	0	1	7	5	39	6	12	45	46	11	27	0	57	1	78.9474	19.2982	47.3684	0
16	0	10	0	6	5	0	0	0	20	0	0	0	0	0	0	0	6	0	25	0	6	25	31	0	11	0	31	1	80.6452	0	35.4839	0
17	0	10	0	2	19	1	11	0	28	0	0	0	0	0	0	0	2	1	47	11	3	58	49	12	33	0	61	1	95.082	19.6721	54.0984	0
18	0	10	0	42	10	43	17	2	7	6	0	0	0	0	0	6	44	49	17	17	93	34	61	66	112	0	127	1	26.7717	51.9685	88.189	0
19	0	10	0	4	23	2	0	0	6	0	0	0	0	0	0	0	4	2	29	0	6	29	33	2	29	0	35	1	82.8571	5.71429	82.8571	0
20	0	10	0	7	18	0	6	0	5	2	0	0	0	0	0	2	7	2	23	6	9	29	30	8	31	0	38	1	76.3158	21.0526	81.5789	0
21	0	10	0	0	38	2	2	0	6	1	1	0	0	0	0	2	0	3	44	3	3	47	44	6	42	0	50	1	94	12	84	0
22	0	10	0	0	73	0	6	0	10	1	3	0	0	0	0	4	0	1	83	9	1	92	83	10	79	0	93	1	98.9247	10.7527	84.9462	0
23	0	10	0	0	37	0	2	0	5	0	0	0	0	0	0	0	0	0	42	2	0	44	42	2	39	0	44	1	100	4.54545	88.6364	0
24	0	10	0	0	29	0	3	0	2	0	0	0	0	0	0	0	0	0	31	3	0	34	31	3	32	0	34	1	100	8.82353	94.1176	0
25	0	10	0	0	33	2	18	0	17	0	2	0	0	0	0	2	0	2	50	20	2	70	50	22	53	0	72	1	97.2222	30.5556	73.6111	0
26	0	10	0	0	8	2	4	2	3	6	2	0	0	0	0	8	2	8	11	6	10	17	13	14	14	0	27	1	62.963	51.8519	51.8519	0
27	0	10	0	2	28	1	7	0	3	0	2	0	0	0	0	2	2	1	31	9	3	40	33	10	38	0	43	1	93.0233	23.2558	88.3721	0
28	0	10	0	4	46	1	12	0	19	0	1	0	0	0	0	1	4	1	65	13	5	78	69	14	63	0	83	1	93.9759	16.8675	75.9036	0
29	0	10	0	0	19	0	1	0	2	0	0	0	0	0	0	0	0	0	21	1	0	22	21	1	20	0	22	1	100	4.54545	90.9091	0
30	0	10	0	0	17	2	6	2	11	0	0	0	0	0	0	0	2	2	28	6	4	34	30	8	25	0	38	1	89.4737	21.0526	65.7895	0
31	0	10	0	19	62	3	12	8	20	5	1	0	0	0	0	6	27	8	82	13	35	95	109	21	96	0	130	1	73.0769	16.1538	73.8462	0
32	0	10	0	15	23	3	7	5	6	0	0	0	0	0	0	0	20	3	29	7	23	36	49	10	48	0	59	1	61.0169	16.9492	81.3559	0
33	0	10	0	5	5	2	3	1	3	0	0	0	0	0	0	0	6	2	8	3	8	11	14	5	15	0	19	1	57.8947	26.3158	78.9474	0
34	0	10	0	0	10	2	1	2	3	0	1	0	0	0	0	1	2	2	13	2	4	15	15	4	13	0	19	1	78.9474	21.0526	68.4211	0
35	0	10	0	0	10	3	2	2	4	0	0	0	0	0	0	0	2	3	14	2	5	16	16	5	15	0	21	1	76.1905	23.8095	71.4286	0
36	0	10	0	0	7	0	11	0	9	0	0	0	0	0	0	0	0	0	16	11	0	27	16	11	18	0	27	1	100	40.7407	66.6667	0
37	0	10	0	0	4	0	11	0	11	0	0	0	0	0	0	0	0	0	15	11	0	26	15	11	15	0	26	1	100	42.3077	57.6923	0
38	0	10	0	0	20	3	16	1	16	0	1	0	0	0	0	1	1	3	36	17	4	53	37	20	39	0	57	1	92.9825	35.0877	68.4211	0
39	0	10	0	4	29	0	2	0	4	0	0	0	0	0	0	0	4	0	33	2	4	35	37	2	35	0	39	1	89.7436	5.12821	89.7436	0
40	0	10	0	5	9	1	2	3	2	0	0	0	0	0	0	0	8	1	11	2	9	13	19	3	17	0	22	1	59.0909	13.6364	77.2727	0
41	0	10	0	0	27	0	3	0	9	0	0	0	0	0	0	0	0	0	36	3	0	39	36	3	30	0	39	1	100	7.69231	76.9231	0
42	0	10	0	0	5	1	0	0	1	0	0	0	0	0	0	0	0	1	6	0	1	6	6	1	6	0	7	1	85.7143	14.2857	85.7143	0
43	0	10	0	0	6	3	2	1	3	0	1	0	0	0	0	1	1	3	9	3	4	12	10	6	11	0	16	1	75	37.5	68.75	0
44	0	10	0	0	16	1	1	0	1	0	1	0	0	0	0	1	0	1	17	2	1	19	17	3	18	0	20	1	95	15	90	0
45	0	10	0	0	18	0	3	0	5	1	1	0	0	0	0	2	0	1	23	4	1	27	23	5	21	0	28	1	96.4286	17.8571	75	0
46	0	10	0	0	1	0	7	0	3	1	0	0	0	0	0	1	0	1	4	7	1	11	4	8	8	0	12	1	91.6667	66.6667	66.6667	0
47	0	10	0	0	3	0	9	0	7	0	0	0	0	0	0	0	0	0	10	9	0	19	10	9	12	0	19	1	100	47.3684	63.1579	0
48	0	10	0	0	1	0	6	0	5	0	3	0	0	0	0	3	0	0	6	9	0	15	6	9	7	0	15	1	100	60	46.6667	0
49	0	10	0	0	5	1	6	0	6	0	0	0	0	0	0	0	0	1	11	6	1	17	11	7	12	0	18	1	94.4444	38.8889	66.6667	0
50	0	10	0	0	1	0	0	0	3	0	0	0	0	0	0	0	0	0	4	0	0	4	4	0	1	0	4	1	100	0	25	0
51	0	10	0	0	3	0	1	0	2	0	0	0	0	0	0	0	0	0	5	1	0	6	5	1	4	0	6	1	100	16.6667	66.6667	0
52	0	10	0	0	3	0	0	0	1	0	0	0	0	0	0	0	0	0	4	0	0	4	4	0	3	0	4	1	100	0	75	0
53	0	10	0	2	9	0	0	0	4	0	0	0	0	0	0	0	2	0	13	0	2	13	15	0	11	0	15	1	86.6667	0	73.3333	0
54	0	10	0	4	1	2	2	0	2	0	0	0	0	0	0	0	4	2	3	2	6	5	7	4	9	0	11	1	45.4545	36.3636	81.8182	0
55	0	10	0	0	8	0	2	0	1	1	0	0	0	0	0	1	0	1	9	2	1	11	9	3	10	0	12	1	91.6667	25	83.3333	0
56	0	10	0	0	2	0	3	0	5	0	2	0	0	0	0	2	0	0	7	5	0	12	7	5	5	0	12	1	100	41.6667	41.6667	0
57	0	10	0	1	1	0	3	0	3	0	0	0	0	0	0	0	1	0	4	3	1	7	5	3	5	0	8	1	87.5	37.5	62.5	0
58	0	10	0	0	1	0	3	0	3	0	0	0	0	0	0	0	0	0	4	3	0	7	4	3	4	0	7	1	100	42.8571	57.1429	0
59	0	10	0	0	0	1	4	1	4	0	0	0	0	0	0	0	1	1	4	4	2	8	5	5	5	0	10	1	80	50	50	0
60	0	10	0	1	4	0	1	0	1	0	0	0	0	0	0	0	1	0	5	1	1	6	6	1	6	0	7	1	85.7143	14.2857	85.7143	0
61	0	10	0	0	1	0	7	0	7	0	0	0	0	0	0	0	0	0	8	7	0	15	8	7	8	0	15	1	100	46.6667	53.3333	0
62	0	10	0	0	2	0	0	0	0	0	0	0	0	0	0	0	0	0	2	0	0	2	2	0	2	0	2	1	100	0	100	0
63	0	10	0	0	1	1	5	0	4	0	1	0	0	0	0	1	0	1	5	6	1	11	5	7	7	0	12	1	91.6667	58.3333	58.3333	0
64	0	10	0	0	0	0	4	0	5	0	0	0	0	0	0	0	0	0	5	4	0	9	5	4	4	0	9	1	100	44.4444	44.4444	0
65	0	10	0	2	5	1	4	0	3	1	0	0	0	0	0	1	2	2	8	4	4	12	10	6	12	0	16	1	75	37.5	75	0
66	0	10	0	0	6	0	3	0	3	0	0	0	0	0	0	0	0	0	9	3	0	12	9	3	9	0	12	1	100	25	75	0
67	0	10	0	0	5	0	6	0	6	0	0	0	0	0	0	0	0	0	11	6	0	17	11	6	11	0	17	1	100	35.2941	64.7059	0
68	0	10	0	0	5	0	3	0	2	0	1	0	0	0	0	1	0	0	7	4	0	11	7	4	8	0	11	1	100	36.3636	72.7273	0
69	0	10	0	1	4	0	3	0	4	0	0	0	0	0	0	0	1	0	8	3	1	11	9	3	8	0	12	1	91.6667	25	66.6667	0
70	0	10	0	0	7	1	9	1	9	0	3	0	0	0	0	3	1	1	16	12	2	28	17	13	17	0	30	1	93.3333	43.3333	56.6667	0
71	0	10	0	2	8	0	0	0	4	0	0	0	0	0	0	0	2	0	12	0	2	12	14	0	10	0	14	1	85.7143	0	71.4286	0
72	0	10	0	0	11	0	4	0	7	0	0	0	0	0	0	0	0	0	18	4	0	22	18	4	15	0	22	1	100	18.1818	68.1818	0
73	0	10	0	0	9	3	6	0	4	3	0	0	0	0	0	3	0	6	13	6	6	19	13	12	18	0	25	1	76	48	72	0
74	0	10	0	0	5	0	0	0	1	0	0	0	0	0	0	0	0	0	6	0	0	6	6	0	5	0	6	1	100	0	83.3333	0
75	0	10	0	0	11	1	4	1	3	1	1	0	0	0	0	2	1	2	14	5	3	19	15	7	16	0	22	1	86.3636	31.8182	72.7273	0
76	0	10	0	0	17	0	4	0	3	0	0	0	0	0	0	0	0	0	20	4	0	24	20	4	21	0	24	1	100	16.6667	87.5	0
77	0	10	0	0	0	1	5	1	5	0	0	0	0	0	0	0	1	1	5	5	2	10	6	6	6	0	12	1	83.3333	50	50	0
78	0	10	0	0	20	2	9	2	15	0	0	0	0	0	0	0	2	2	35	9	4	44	37	11	31	0	48	1	91.6667	22.9167	64.5833	0
79	0	10	0	0	19	0	1	0	4	0	1	0	0	0	0	1	0	0	23	2	0	25	23	2	20	0	25	1	100	8	80	0
80	0	10	0	0	5	0	5	0	7	0	3	0	0	0	0	3	0	0	12	8	0	20	12	8	10	0	20	1	100	40	50	0
81	0	10	0	0	9	3	1	1	2	0	0	0	0	0	0	0	1	3	11	1	4	12	12	4	13	0	16	1	75	25	81.25	0
82	0	10	0	0	3	0	2	0	4	0	0	0	0	0	0	0	0	0	7	2	0	9	7	2	5	0	9	1	100	22.2222	55.5556	0
83	0	10	0	0	8	1	5	1	8	0	0	0	0	0	0	0	1	1	16	5	2	21	17	6	14	0	23	1	91.3043	26.087	60.8696	0
84	0	10	0	0	10	0	0	0	0	0	0	0	0	0	0	0	0	0	10	0	0	10	10	0	10	0	10	1	100	0	100	0
85	0	10	0	0	11	0	1	0	1	0	0	0	0	0	0	0	0	0	12	1	0	13	12	1	12	0	13	1	100	7.69231	92.3077	0
86	0	10	0	0	6	0	4	0	4	0	0	0	0	0	0	0	0	0	10	4	0	14	10	4	10	0	14	1	100	28.5714	71.4286	0
87	0	10	0	0	1	1	10	0	11	0	1	0	0	0	0	1	0	1	12	11	1	23	12	12	12	0	24	1	95.8333	50	50	0
88	0	10	0	0	7	0	14	0	14	0	0	0	0	0	0	0	0	0	21	14	0	35	21	14	21	0	35	1	100	40	60	0
89	0	10	0	0	3	2	4	2	4	0	0	0	0	0	0	0	2	2	7	4	4	11	9	6	9	0	15	1	73.3333	40	60	0
90	0	10	0	2	2	8	10	9	10	0	0	0	0	0	0	0	11	8	12	10	19	22	23	18	22	0	41	1	53.6585	43.9024	53.6585	0
91	0	10	0	0	5	2	3	1	3	0	0	0	0	0	0	0	1	2	8	3	3	11	9	5	10	0	14	1	78.5714	35.7143	71.4286	0
92	0	10	0	0	28	1	19	1	22	2	0	0	0	0	0	2	1	3	50	19	4	69	51	22	48	0	73	1	94.5205	30.137	65.7534	0
93	0	10	0	0	6	1	3	0	6	0	0	0	0	0	0	0	0	1	12	3	1	15	12	4	10	0	16	1	93.75	25	62.5	0
94	0	10	0	0	7	1	11	0	8	1	0	0	0	0	0	1	0	2	15	11	2	26	15	13	19	0	28	1	92.8571	46.4286	67.8571	0
95	0	10	0	0	2	1	2	0	2	0	0	0	0	0	0	0	0	1	4	2	1	6	4	3	5	0	7	1	85.7143	42.8571	71.4286	0
96	0	10	0	0	3	3	8	0	9	0	2	0	0	0	0	2	0	3	12	10	3	22	12	13	14	0	25	1	88	52	56	0
97	0	10	0	0	1	0	10	0	18	0	1	0	0	0	0	1	0	0	19	11	0	30	19	11	11	0	30	1	100	36.6667	36.6667	0
98	0	10	0	0	0	1	5	1	8	0	1	0	0	0	0	1	1	1	8	6	2	14	9	7	6	0	16	1	87.5	43.75	37.5	0
99	0	10	0	0	5	5	9	7	9	0	3	0	0	0	0	3	7	5	14	12	12	26	21	17	19	0	38	1	68.4211	44.7368	50	0
100	0	10	0	0	2	5	12	5	13	0	0	0	0	0	0	0	5	5	15	12	10	27	20	17	19	0	37	1	72.973	45.9459	51.3514	0
101	0	10	0	0	1	1	21	1	25	0	0	0	0	0	0	0	1	1	26	21	2	47	27	22	23	0	49	1	95.9184	44.898	46.9388	0
102	0	10	0	0	13	0	6	0	12	0	0	0	0	0	0	0	0	0	25	6	0	31	25	6	19	0	31	1	100	19.3548	61.2903	0
103	0	10	0	0	33	2	14	1	16	0	0	0	0	0	0	0	1	2	49	14	3	63	50	16	49	0	66	1	95.4545	24.2424	74.2424	0
104	0	10	0	0	24	2	5	2	9	0	0	0	0	0	0	0	2	2	33	5	4	38	35	7	31	0	42	1	90.4762	16.6667	73.8095	0
105	0	10	0	0	6	0	8	0	12	0	1	0	0	0	0	1	0	0	18	9	0	27	18	9	14	0	27	1	100	33.3333	51.8519	0
106	0	10	0	11	24	3	3	1	3	0	0	0	0	0	0	0	12	3	27	3	15	30	39	6	41	0	45	1	66.6667	13.3333	91.1111	0
107	0	10	0	0	2	0	3	0	3	0	3	0	0	0	0	3	0	0	5	6	0	11	5	6	5	0	11	1	100	54.5455	45.4545	0
108	0	10	0	5	0	4	12	9	12	0	0	0	0	0	0	0	14	4	12	12	18	24	26	16	21	0	42	1	57.1429	38.0952	50	0
109	0	10	0	0	7	1	3	1	4	0	1	0	0	0	0	1	1	1	11	4	2	15	12	5	11	0	17	1	88.2353	29.4118	64.7059	0
110	0	10	0	0	7	0	3	0	3	0	14	0	0	0	0	14	0	0	10	17	0	27	10	17	10	0	27	1	100	62.963	37.037	0
111	0	10	0	2	0	0	0	1	1	0	0	0	0	0	0	0	3	0	1	0	3	1	4	0	2	0	4	1	25	0	50	0
112	0	10	0	0	3	0	12	0	16	1	0	0	0	0	0	1	0	1	19	12	1	31	19	13	15	0	32	1	96.875	40.625	46.875	0
113	0	10	0	0	4	3	2	3	2	0	0	0	0	0	0	0	3	3	6	2	6	8	9	5	9	0	14	1	57.1429	35.7143	64.2857	0
114	0	10	0	0	0	2	25	2	26	0	1	0	0	0	0	1	2	2	26	26	4	52	28	28	27	0	56	1	92.8571	50	48.2143	0
115	0	10	0	0	7	0	17	0	15	0	0	0	0	0	0	0	0	0	22	17	0	39	22	17	24	0	39	1	100	43.5897	61.5385	0
116	0	10	0	0	5	0	2	0	3	0	0	0	0	0	0	0	0	0	8	2	0	10	8	2	7	0	10	1	100	20	70	0
117	0	10	0	0	5	0	5	0	6	0	0	0	0	0	0	0	0	0	11	5	0	16	11	5	10	0	16	1	100	31.25	62.5	0
118	0	10	0	0	1	0	3	0	3	0	0	0	0	0	0	0	0	0	4	3	0	7	4	3	4	0	7	1	100	42.8571	57.1429	0
119	0	10	0	0	7	1	20	1	20	0	0	0	0	0	0	0	1	1	27	20	2	47	28	21	28	0	49	1	95.9184	42.8571	57.1429	0
120	0	10	0	0	13	1	11	0	14	1	3	0	0	0	0	4	0	2	27	14	2	41	27	16	25	0	43	1	95.3488	37.2093	58.1395	0
121	0	10	0	0	14	0	23	0	25	0	4	0	0	0	0	4	0	0	39	27	0	66	39	27	37	0	66	1	100	40.9091	56.0606	0
