# Supplementary material for: Indoor residual spraying with a mixture of clothianidin (a neonicotinoid insecticide) and deltamethrin provides improved control and long residual activity against pyrethroid resistant Anopheles gambiae sl in Southern Benin
Source: PLoS One. 2017 Dec 18;12(12):e0189575. doi: 10.1371/journal.pone.0189575 (PMC5734732; doi:10.1371/journal.pone.0189575)
Supplement: S2 Table — (XLSX) [file pone.0189575.s002.xlsx]

## Sheet: 7-12 months
day	hut	treat	sleeper	vrex_ufl	vrex_bfl	vrex_ufd	vrex_bfd	room_ufl	room_bfl	room_ufd	room_bfd	net_ufl	net_bfl	net_ufd	net_bfd	imm_dead	unf_live	unf_dead	bf_live	bf_dead	tot_unf	tot_blf	tot_live	tot_dead	tot_exop	tot_net	total	one	%bl_fed	%dead	%exophil	%net
122	0	0	0	1	3	0	4	0	24	0	0	0	0	0	0	0	1	0	27	4	1	31	28	4	8	0	32	1	96.875	12.5	25	0
123	0	0	0	0	7	0	3	4	37	0	0	0	0	0	0	0	4	0	44	3	4	47	48	3	10	0	51	1	92.1569	5.88235	19.6078	0
124	0	0	0	0	7	0	5	1	20	0	2	0	0	0	0	2	1	0	27	7	1	34	28	7	12	0	35	1	97.1429	20	34.2857	0
125	0	0	0	0	3	0	7	0	35	0	0	0	0	0	0	0	0	0	38	7	0	45	38	7	10	0	45	1	100	15.5556	22.2222	0
126	0	0	0	5	16	1	4	2	28	0	0	0	0	0	0	0	7	1	44	4	8	48	51	5	26	0	56	1	85.7143	8.92857	46.4286	0
127	0	0	0	0	19	0	8	0	42	0	2	0	0	0	0	2	0	0	61	10	0	71	61	10	27	0	71	1	100	14.0845	38.0282	0
128	0	0	0	0	32	0	5	0	29	0	0	0	0	0	0	0	0	0	61	5	0	66	61	5	37	0	66	1	100	7.57576	56.0606	0
129	0	0	0	4	12	0	7	1	37	0	0	0	0	0	0	0	5	0	49	7	5	56	54	7	23	0	61	1	91.8033	11.4754	37.7049	0
130	0	0	0	0	13	0	2	1	9	1	0	0	0	0	0	1	1	1	22	2	2	24	23	3	15	0	26	1	92.3077	11.5385	57.6923	0
131	0	0	0	0	6	0	7	0	38	0	0	0	0	0	0	0	0	0	44	7	0	51	44	7	13	0	51	1	100	13.7255	25.4902	0
132	0	0	0	1	2	1	1	3	23	0	0	0	0	0	0	0	4	1	25	1	5	26	29	2	5	0	31	1	83.871	6.45161	16.129	0
133	0	0	0	8	6	1	3	4	27	0	0	0	0	0	0	0	12	1	33	3	13	36	45	4	18	0	49	1	73.4694	8.16327	36.7347	0
134	0	0	0	3	16	1	6	0	45	0	1	0	0	0	0	1	3	1	61	7	4	68	64	8	26	0	72	1	94.4444	11.1111	36.1111	0
135	0	0	0	0	5	0	1	4	12	0	0	0	0	0	0	0	4	0	17	1	4	18	21	1	6	0	22	1	81.8182	4.54545	27.2727	0
136	0	0	0	0	11	0	0	0	9	0	1	0	0	0	0	1	0	0	20	1	0	21	20	1	11	0	21	1	100	4.7619	52.381	0
137	0	0	0	0	1	0	2	0	8	0	0	0	0	0	0	0	0	0	9	2	0	11	9	2	3	0	11	1	100	18.1818	27.2727	0
138	0	0	0	0	4	0	3	0	17	0	0	0	0	0	0	0	0	0	21	3	0	24	21	3	7	0	24	1	100	12.5	29.1667	0
139	0	0	0	0	24	0	1	0	11	0	0	0	0	0	0	0	0	0	35	1	0	36	35	1	25	0	36	1	100	2.77778	69.4444	0
140	0	0	0	0	6	0	1	4	18	0	0	0	0	0	0	0	4	0	24	1	4	25	28	1	7	0	29	1	86.2069	3.44828	24.1379	0
141	0	0	0	0	1	0	0	0	10	0	0	0	0	0	0	0	0	0	11	0	0	11	11	0	1	0	11	1	100	0	9.09091	0
142	0	0	0	1	0	0	0	2	22	0	0	0	0	0	0	0	3	0	22	0	3	22	25	0	1	0	25	1	88	0	4	0
143	0	0	0	1	7	1	1	1	17	0	0	0	0	0	0	0	2	1	24	1	3	25	26	2	10	0	28	1	89.2857	7.14286	35.7143	0
144	0	0	0	0	3	0	2	0	8	0	0	0	0	0	0	0	0	0	11	2	0	13	11	2	5	0	13	1	100	15.3846	38.4615	0
145	0	0	0	2	6	0	19	0	46	0	0	0	0	0	0	0	2	0	52	19	2	71	54	19	27	0	73	1	97.2603	26.0274	36.9863	0
146	0	0	0	0	6	4	7	7	15	0	0	0	0	0	0	0	7	4	21	7	11	28	28	11	17	0	39	1	71.7949	28.2051	43.5897	0
147	0	0	0	12	9	2	4	2	19	0	0	0	0	0	0	0	14	2	28	4	16	32	42	6	27	0	48	1	66.6667	12.5	56.25	0
148	0	0	0	0	2	0	0	1	21	0	0	0	0	0	0	0	1	0	23	0	1	23	24	0	2	0	24	1	95.8333	0	8.33333	0
149	0	0	0	0	0	0	0	0	4	0	0	0	0	0	0	0	0	0	4	0	0	4	4	0	0	0	4	1	100	0	0	0
150	0	0	0	3	6	0	2	0	6	0	0	0	0	0	0	0	3	0	12	2	3	14	15	2	11	0	17	1	82.3529	11.7647	64.7059	0
151	0	0	0	0	7	0	0	0	10	0	0	0	0	0	0	0	0	0	17	0	0	17	17	0	7	0	17	1	100	0	41.1765	0
152	0	0	0	0	5	0	0	0	14	0	0	0	0	0	0	0	0	0	19	0	0	19	19	0	5	0	19	1	100	0	26.3158	0
153	0	0	0	2	10	0	3	2	23	0	0	0	0	0	0	0	4	0	33	3	4	36	37	3	15	0	40	1	90	7.5	37.5	0
154	0	0	0	0	4	0	1	0	13	0	0	0	0	0	0	0	0	0	17	1	0	18	17	1	5	0	18	1	100	5.55556	27.7778	0
155	0	0	0	0	3	0	3	1	13	0	0	0	0	0	0	0	1	0	16	3	1	19	17	3	6	0	20	1	95	15	30	0
156	0	0	0	1	9	0	2	0	16	0	1	0	0	0	0	1	1	0	25	3	1	28	26	3	12	0	29	1	96.5517	10.3448	41.3793	0
157	0	0	0	4	4	0	2	2	11	0	0	0	0	0	0	0	6	0	15	2	6	17	21	2	10	0	23	1	73.913	8.69565	43.4783	0
158	0	0	0	1	3	0	0	0	3	0	0	0	0	0	0	0	1	0	6	0	1	6	7	0	4	0	7	1	85.7143	0	57.1429	0
159	0	0	0	2	1	1	1	1	7	0	0	0	0	0	0	0	3	1	8	1	4	9	11	2	5	0	13	1	69.2308	15.3846	38.4615	0
160	0	0	0	0	1	0	0	0	3	0	0	0	0	0	0	0	0	0	4	0	0	4	4	0	1	0	4	1	100	0	25	0
161	0	0	0	0	1	0	0	0	3	0	0	0	0	0	0	0	0	0	4	0	0	4	4	0	1	0	4	1	100	0	25	0
162	0	0	0	0	4	0	0	0	5	0	0	0	0	0	0	0	0	0	9	0	0	9	9	0	4	0	9	1	100	0	44.4444	0
163	0	0	0	3	10	0	0	3	4	0	0	0	0	0	0	0	6	0	14	0	6	14	20	0	13	0	20	1	70	0	65	0
164	0	0	0	0	8	0	1	0	25	0	0	0	0	0	0	0	0	0	33	1	0	34	33	1	9	0	34	1	100	2.94118	26.4706	0
165	0	0	0	0	0	0	0	0	10	0	0	0	0	0	0	0	0	0	10	0	0	10	10	0	0	0	10	1	100	0	0	0
166	0	0	0	0	1	0	1	0	10	0	0	0	0	0	0	0	0	0	11	1	0	12	11	1	2	0	12	1	100	8.33333	16.6667	0
167	0	0	0	1	3	0	3	0	21	0	0	0	0	0	0	0	1	0	24	3	1	27	25	3	7	0	28	1	96.4286	10.7143	25	0
168	0	0	0	0	2	0	0	0	0	0	0	0	0	0	0	0	0	0	2	0	0	2	2	0	2	0	2	1	100	0	100	0
169	0	0	0	1	5	0	0	0	1	0	0	0	0	0	0	0	1	0	6	0	1	6	7	0	6	0	7	1	85.7143	0	85.7143	0
170	0	0	0	1	2	0	1	0	13	0	0	0	0	0	0	0	1	0	15	1	1	16	16	1	4	0	17	1	94.1176	5.88235	23.5294	0
171	0	0	0	0	1	0	1	0	8	0	0	0	0	0	0	0	0	0	9	1	0	10	9	1	2	0	10	1	100	10	20	0
172	0	0	0	0	3	0	0	0	3	0	0	0	0	0	0	0	0	0	6	0	0	6	6	0	3	0	6	1	100	0	50	0
173	0	0	0	0	4	0	0	0	4	0	0	0	0	0	0	0	0	0	8	0	0	8	8	0	4	0	8	1	100	0	50	0
174	0	0	0	0	3	0	0	0	1	0	0	0	0	0	0	0	0	0	4	0	0	4	4	0	3	0	4	1	100	0	75	0
175	0	0	0	0	0	0	0	0	2	0	0	0	0	0	0	0	0	0	2	0	0	2	2	0	0	0	2	1	100	0	0	0
176	0	0	0	0	1	0	0	0	1	0	0	0	0	0	0	0	0	0	2	0	0	2	2	0	1	0	2	1	100	0	50	0
177	0	0	0	0	1	0	1	0	4	0	0	0	0	0	0	0	0	0	5	1	0	6	5	1	2	0	6	1	100	16.6667	33.3333	0
178	0	0	0	0	3	0	0	0	15	0	0	0	0	0	0	0	0	0	18	0	0	18	18	0	3	0	18	1	100	0	16.6667	0
179	0	0	0	0	1	0	0	0	1	0	0	0	0	0	0	0	0	0	2	0	0	2	2	0	1	0	2	1	100	0	50	0
180	0	0	0	1	0	0	1	0	4	0	0	0	0	0	0	0	1	0	4	1	1	5	5	1	2	0	6	1	83.3333	16.6667	33.3333	0
181	0	0	0	0	1	0	0	0	9	0	0	0	0	0	0	0	0	0	10	0	0	10	10	0	1	0	10	1	100	0	10	0
182	0	0	0	0	0	0	0	0	3	0	0	0	0	0	0	0	0	0	3	0	0	3	3	0	0	0	3	1	100	0	0	0
183	0	0	0	0	0	0	0	0	2	0	0	0	0	0	0	0	0	0	2	0	0	2	2	0	0	0	2	1	100	0	0	0
184	0	0	0	1	1	0	0	0	4	0	0	0	0	0	0	0	1	0	5	0	1	5	6	0	2	0	6	1	83.3333	0	33.3333	0
185	0	0	0	0	0	0	0	1	2	0	0	0	0	0	0	0	1	0	2	0	1	2	3	0	0	0	3	1	66.6667	0	0	0
186	0	0	0	1	0	0	0	0	0	0	0	0	0	0	0	0	1	0	0	0	1	0	1	0	1	0	1	1	0	0	100	0
187	0	0	0	0	1	0	0	0	3	0	0	0	0	0	0	0	0	0	4	0	0	4	4	0	1	0	4	1	100	0	25	0
188	0	0	0	0	0	0	1	0	4	0	0	0	0	0	0	0	0	0	4	1	0	5	4	1	1	0	5	1	100	20	20	0
189	0	0	0	1	1	0	0	0	14	0	0	0	0	0	0	0	1	0	15	0	1	15	16	0	2	0	16	1	93.75	0	12.5	0
190	0	0	0	0	1	0	0	0	1	0	0	0	0	0	0	0	0	0	2	0	0	2	2	0	1	0	2	1	100	0	50	0
191	0	0	0	0	6	0	0	0	5	0	0	0	0	0	0	0	0	0	11	0	0	11	11	0	6	0	11	1	100	0	54.5455	0
192	0	0	0	0	2	0	0	0	5	0	0	0	0	0	0	0	0	0	7	0	0	7	7	0	2	0	7	1	100	0	28.5714	0
193	0	0	0	0	1	0	0	0	0	0	0	0	0	0	0	0	0	0	1	0	0	1	1	0	1	0	1	1	100	0	100	0
194	0	0	0	0	2	0	0	0	1	0	0	0	0	0	0	0	0	0	3	0	0	3	3	0	2	0	3	1	100	0	66.6667	0
195	0	0	0	0	4	0	1	1	3	0	0	0	0	0	0	0	1	0	7	1	1	8	8	1	5	0	9	1	88.8889	11.1111	55.5556	0
196	0	0	0	0	2	0	0	0	0	0	0	0	0	0	0	0	0	0	2	0	0	2	2	0	2	0	2	1	100	0	100	0
197	0	0	0	0	4	0	0	0	7	0	0	0	0	0	0	0	0	0	11	0	0	11	11	0	4	0	11	1	100	0	36.3636	0
198	0	0	0	0	0	0	0	0	6	0	0	0	0	0	0	0	0	0	6	0	0	6	6	0	0	0	6	1	100	0	0	0
199	0	0	0	0	3	0	0	0	5	0	0	0	0	0	0	0	0	0	8	0	0	8	8	0	3	0	8	1	100	0	37.5	0
200	0	0	0	0	0	0	0	0	6	0	0	0	0	0	0	0	0	0	6	0	0	6	6	0	0	0	6	1	100	0	0	0
201	0	0	0	0	2	0	0	0	2	0	0	0	0	0	0	0	0	0	4	0	0	4	4	0	2	0	4	1	100	0	50	0
202	0	0	0	0	0	0	0	0	0	0	0	0	0	0	0	0	0	0	0	0	0	0	0	0	0	0	0	1	#DIV/0!	#DIV/0!	#DIV/0!	#DIV/0!
203	0	0	0	0	0	0	0	0	0	0	0	0	0	0	0	0	0	0	0	0	0	0	0	0	0	0	0	1	#DIV/0!	#DIV/0!	#DIV/0!	#DIV/0!
204	0	0	0	0	0	0	0	0	0	0	0	0	0	0	0	0	0	0	0	0	0	0	0	0	0	0	0	1	#DIV/0!	#DIV/0!	#DIV/0!	#DIV/0!
205	0	0	0	5	2	0	0	1	5	0	0	0	0	0	0	0	6	0	7	0	6	7	13	0	7	0	13	1	53.8462	0	53.8462	0
206	0	0	0	0	0	0	0	1	1	0	0	0	0	0	0	0	1	0	1	0	1	1	2	0	0	0	2	1	50	0	0	0
207	0	0	0	0	1	0	0	0	8	0	0	0	0	0	0	0	0	0	9	0	0	9	9	0	1	0	9	1	100	0	11.1111	0
208	0	0	0	0	6	0	0	0	1	0	0	0	0	0	0	0	0	0	7	0	0	7	7	0	6	0	7	1	100	0	85.7143	0
209	0	0	0	0	0	0	0	0	10	0	0	0	0	0	0	0	0	0	10	0	0	10	10	0	0	0	10	1	100	0	0	0
210	0	0	0	0	0	0	1	1	4	0	0	0	0	0	0	0	1	0	4	1	1	5	5	1	1	0	6	1	83.3333	16.6667	16.6667	0
211	0	0	0	0	1	0	0	0	12	0	0	0	0	0	0	0	0	0	13	0	0	13	13	0	1	0	13	1	100	0	7.69231	0
212	0	0	0	0	0	0	0	0	9	0	0	0	0	0	0	0	0	0	9	0	0	9	9	0	0	0	9	1	100	0	0	0
213	0	0	0	0	4	0	0	0	0	0	0	0	0	0	0	0	0	0	4	0	0	4	4	0	4	0	4	1	100	0	100	0
214	0	0	0	0	0	0	0	0	2	0	0	0	0	0	0	0	0	0	2	0	0	2	2	0	0	0	2	1	100	0	0	0
215	0	0	0	0	1	0	0	0	0	0	0	0	0	0	0	0	0	0	1	0	0	1	1	0	1	0	1	1	100	0	100	0
216	0	0	0	0	0	0	0	0	1	0	0	0	0	0	0	0	0	0	1	0	0	1	1	0	0	0	1	1	100	0	0	0
217	0	0	0	1	1	0	0	0	1	0	0	0	0	0	0	0	1	0	2	0	1	2	3	0	2	0	3	1	66.6667	0	66.6667	0
218	0	0	0	0	0	0	0	0	0	0	0	0	0	0	0	0	0	0	0	0	0	0	0	0	0	0	0	1	#DIV/0!	#DIV/0!	#DIV/0!	#DIV/0!
219	0	0	0	0	0	0	0	0	2	0	0	0	0	0	0	0	0	0	2	0	0	2	2	0	0	0	2	1	100	0	0	0
220	0	0	0	0	0	0	0	0	0	0	0	0	0	0	0	0	0	0	0	0	0	0	0	0	0	0	0	1	#DIV/0!	#DIV/0!	#DIV/0!	#DIV/0!
221	0	0	0	0	0	0	0	0	1	0	0	0	0	0	0	0	0	0	1	0	0	1	1	0	0	0	1	1	100	0	0	0
222	0	0	0	0	2	0	0	0	1	0	0	0	0	0	0	0	0	0	3	0	0	3	3	0	2	0	3	1	100	0	66.6667	0
223	0	0	0	1	1	0	0	0	1	0	0	0	0	0	0	0	1	0	2	0	1	2	3	0	2	0	3	1	66.6667	0	66.6667	0
224	0	0	0	0	0	0	0	1	1	0	0	0	0	0	0	0	1	0	1	0	1	1	2	0	0	0	2	1	50	0	0	0
225	0	0	0	0	0	0	0	0	2	0	0	0	0	0	0	0	0	0	2	0	0	2	2	0	0	0	2	1	100	0	0	0
226	0	0	0	0	1	0	0	0	3	0	0	0	0	0	0	0	0	0	4	0	0	4	4	0	1	0	4	1	100	0	25	0
227	0	0	0	0	1	0	0	0	2	0	0	0	0	0	0	0	0	0	3	0	0	3	3	0	1	0	3	1	100	0	33.3333	0
228	0	0	0	0	2	0	0	0	3	0	0	0	0	0	0	0	0	0	5	0	0	5	5	0	2	0	5	1	100	0	40	0
229	0	0	0	0	2	0	0	0	3	0	0	0	0	0	0	0	0	0	5	0	0	5	5	0	2	0	5	1	100	0	40	0
230	0	0	0	0	2	0	0	0	1	0	0	0	0	0	0	0	0	0	3	0	0	3	3	0	2	0	3	1	100	0	66.6667	0
231	0	0	0	0	1	0	0	0	3	0	0	0	0	0	0	0	0	0	4	0	0	4	4	0	1	0	4	1	100	0	25	0
232	0	0	0	0	1	0	0	0	0	0	0	0	0	0	0	0	0	0	1	0	0	1	1	0	1	0	1	1	100	0	100	0
233	0	0	0	0	5	0	0	0	19	0	0	0	0	0	0	0	0	0	24	0	0	24	24	0	5	0	24	1	100	0	20.8333	0
234	0	0	0	0	2	0	0	0	1	0	0	0	0	0	0	0	0	0	3	0	0	3	3	0	2	0	3	1	100	0	66.6667	0
235	0	0	0	0	1	0	0	0	1	0	0	0	0	0	0	0	0	0	2	0	0	2	2	0	1	0	2	1	100	0	50	0
236	0	0	0	0	3	0	0	0	1	0	0	0	0	0	0	0	0	0	4	0	0	4	4	0	3	0	4	1	100	0	75	0
237	0	0	0	0	1	0	0	0	1	0	0	0	0	0	0	0	0	0	2	0	0	2	2	0	1	0	2	1	100	0	50	0
238	0	0	0	0	1	0	0	0	1	0	0	0	0	0	0	0	0	0	2	0	0	2	2	0	1	0	2	1	100	0	50	0
239	0	0	0	0	1	0	0	0	1	0	0	0	0	0	0	0	0	0	2	0	0	2	2	0	1	0	2	1	100	0	50	0
240	0	0	0	0	0	0	0	0	5	0	0	0	0	0	0	0	0	0	5	0	0	5	5	0	0	0	5	1	100	0	0	0
241	0	0	0	3	60	0	2	3	163	0	0	0	0	0	0	0	6	0	223	2	6	225	229	2	65	0	231	1	97.4026	0.865801	28.1385	0
242	0	0	0	5	73	0	3	1	131	0	1	0	0	0	0	1	6	0	204	4	6	208	210	4	81	0	214	1	97.1963	1.86916	37.8505	0
122	0	1	0	0	15	0	10	0	20	0	0	0	0	0	0	0	0	0	35	10	0	45	35	10	25	0	45	1	100	22.2222	55.5556	0
123	0	1	0	0	11	0	4	0	13	0	2	0	0	0	0	2	0	0	24	6	0	30	24	6	15	0	30	1	100	20	50	0
124	0	1	0	19	39	4	5	23	45	0	2	0	0	0	0	2	42	4	84	7	46	91	126	11	67	0	137	1	66.4234	8.0292	48.9051	0
125	0	1	0	0	8	0	1	0	4	0	0	0	0	0	0	0	0	0	12	1	0	13	12	1	9	0	13	1	100	7.69231	69.2308	0
126	0	1	0	17	19	3	6	17	23	0	0	0	0	0	0	0	34	3	42	6	37	48	76	9	45	0	85	1	56.4706	10.5882	52.9412	0
127	0	1	0	47	7	6	0	19	3	1	0	0	0	0	0	1	66	7	10	0	73	10	76	7	60	0	83	1	12.0482	8.43373	72.2892	0
128	0	1	0	17	15	0	2	4	7	0	0	0	0	0	0	0	21	0	22	2	21	24	43	2	34	0	45	1	53.3333	4.44444	75.5556	0
129	0	1	0	23	23	5	5	29	17	0	0	0	0	0	0	0	52	5	40	5	57	45	92	10	56	0	102	1	44.1176	9.80392	54.902	0
130	0	1	0	15	18	3	7	4	20	1	0	0	0	0	0	1	19	4	38	7	23	45	57	11	43	0	68	1	66.1765	16.1765	63.2353	0
131	0	1	0	0	19	0	5	0	14	0	0	0	0	0	0	0	0	0	33	5	0	38	33	5	24	0	38	1	100	13.1579	63.1579	0
132	0	1	0	7	22	0	5	0	21	0	0	0	0	0	0	0	7	0	43	5	7	48	50	5	34	0	55	1	87.2727	9.09091	61.8182	0
133	0	1	0	1	10	0	6	0	25	0	0	0	0	0	0	0	1	0	35	6	1	41	36	6	17	0	42	1	97.619	14.2857	40.4762	0
134	0	1	0	0	23	5	7	5	23	0	1	0	0	0	0	1	5	5	46	8	10	54	51	13	35	0	64	1	84.375	20.3125	54.6875	0
135	0	1	0	0	32	0	0	2	22	0	0	0	0	0	0	0	2	0	54	0	2	54	56	0	32	0	56	1	96.4286	0	57.1429	0
136	0	1	0	2	22	1	1	4	12	1	0	0	0	0	0	1	6	2	34	1	8	35	40	3	26	0	43	1	81.3953	6.97674	60.4651	0
137	0	1	0	1	4	0	1	0	7	0	0	0	0	0	0	0	1	0	11	1	1	12	12	1	6	0	13	1	92.3077	7.69231	46.1538	0
138	0	1	0	1	6	0	0	0	5	0	0	0	0	0	0	0	1	0	11	0	1	11	12	0	7	0	12	1	91.6667	0	58.3333	0
139	0	1	0	2	15	0	1	0	8	0	0	0	0	0	0	0	2	0	23	1	2	24	25	1	18	0	26	1	92.3077	3.84615	69.2308	0
140	0	1	0	0	6	0	1	0	22	0	0	0	0	0	0	0	0	0	28	1	0	29	28	1	7	0	29	1	100	3.44828	24.1379	0
141	0	1	0	7	7	0	1	3	8	0	0	0	0	0	0	0	10	0	15	1	10	16	25	1	15	0	26	1	61.5385	3.84615	57.6923	0
142	0	1	0	4	7	0	1	0	9	0	0	0	0	0	0	0	4	0	16	1	4	17	20	1	12	0	21	1	80.9524	4.7619	57.1429	0
143	0	1	0	1	18	0	0	0	11	0	0	0	0	0	0	0	1	0	29	0	1	29	30	0	19	0	30	1	96.6667	0	63.3333	0
144	0	1	0	1	3	0	4	1	8	0	0	0	0	0	0	0	2	0	11	4	2	15	13	4	8	0	17	1	88.2353	23.5294	47.0588	0
145	0	1	0	0	7	0	7	0	9	0	0	0	0	0	0	0	0	0	16	7	0	23	16	7	14	0	23	1	100	30.4348	60.8696	0
146	0	1	0	0	2	0	0	1	2	0	0	0	0	0	0	0	1	0	4	0	1	4	5	0	2	0	5	1	80	0	40	0
147	0	1	0	0	15	0	1	1	9	0	0	0	0	0	0	0	1	0	24	1	1	25	25	1	16	0	26	1	96.1538	3.84615	61.5385	0
148	0	1	0	0	13	0	3	0	7	0	1	0	0	0	0	1	0	0	20	4	0	24	20	4	16	0	24	1	100	16.6667	66.6667	0
149	0	1	0	0	1	0	0	1	8	0	0	0	0	0	0	0	1	0	9	0	1	9	10	0	1	0	10	1	90	0	10	0
150	0	1	0	0	1	0	0	1	1	0	0	0	0	0	0	0	1	0	2	0	1	2	3	0	1	0	3	1	66.6667	0	33.3333	0
151	0	1	0	0	1	0	1	0	5	0	0	0	0	0	0	0	0	0	6	1	0	7	6	1	2	0	7	1	100	14.2857	28.5714	0
152	0	1	0	0	6	0	0	0	2	0	0	0	0	0	0	0	0	0	8	0	0	8	8	0	6	0	8	1	100	0	75	0
153	0	1	0	0	14	0	1	0	5	0	0	0	0	0	0	0	0	0	19	1	0	20	19	1	15	0	20	1	100	5	75	0
154	0	1	0	0	15	0	1	0	17	0	0	0	0	0	0	0	0	0	32	1	0	33	32	1	16	0	33	1	100	3.0303	48.4848	0
155	0	1	0	0	5	0	1	0	2	0	0	0	0	0	0	0	0	0	7	1	0	8	7	1	6	0	8	1	100	12.5	75	0
156	0	1	0	0	1	0	1	0	4	0	0	0	0	0	0	0	0	0	5	1	0	6	5	1	2	0	6	1	100	16.6667	33.3333	0
157	0	1	0	0	1	0	0	0	1	0	0	0	0	0	0	0	0	0	2	0	0	2	2	0	1	0	2	1	100	0	50	0
158	0	1	0	1	5	0	1	1	7	0	0	0	0	0	0	0	2	0	12	1	2	13	14	1	7	0	15	1	86.6667	6.66667	46.6667	0
159	0	1	0	4	0	0	0	6	3	0	0	0	0	0	0	0	10	0	3	0	10	3	13	0	4	0	13	1	23.0769	0	30.7692	0
160	0	1	0	4	6	0	0	0	2	0	0	0	0	0	0	0	4	0	8	0	4	8	12	0	10	0	12	1	66.6667	0	83.3333	0
161	0	1	0	0	0	0	0	0	1	0	0	0	0	0	0	0	0	0	1	0	0	1	1	0	0	0	1	1	100	0	0	0
162	0	1	0	0	2	0	0	0	0	0	0	0	0	0	0	0	0	0	2	0	0	2	2	0	2	0	2	1	100	0	100	0
163	0	1	0	7	3	2	0	7	6	0	0	0	0	0	0	0	14	2	9	0	16	9	23	2	12	0	25	1	36	8	48	0
164	0	1	0	1	9	0	0	0	4	0	0	0	0	0	0	0	1	0	13	0	1	13	14	0	10	0	14	1	92.8571	0	71.4286	0
165	0	1	0	0	9	0	1	0	4	0	0	0	0	0	0	0	0	0	13	1	0	14	13	1	10	0	14	1	100	7.14286	71.4286	0
166	0	1	0	0	2	0	1	0	7	0	0	0	0	0	0	0	0	0	9	1	0	10	9	1	3	0	10	1	100	10	30	0
167	0	1	0	0	6	0	2	0	3	0	0	0	0	0	0	0	0	0	9	2	0	11	9	2	8	0	11	1	100	18.1818	72.7273	0
168	0	1	0	0	7	0	2	0	13	0	1	0	0	0	0	1	0	0	20	3	0	23	20	3	9	0	23	1	100	13.0435	39.1304	0
169	0	1	0	1	4	0	0	0	2	0	0	0	0	0	0	0	1	0	6	0	1	6	7	0	5	0	7	1	85.7143	0	71.4286	0
170	0	1	0	2	2	0	0	1	4	0	0	0	0	0	0	0	3	0	6	0	3	6	9	0	4	0	9	1	66.6667	0	44.4444	0
171	0	1	0	1	3	0	0	0	2	0	0	0	0	0	0	0	1	0	5	0	1	5	6	0	4	0	6	1	83.3333	0	66.6667	0
172	0	1	0	1	8	0	0	0	5	0	0	0	0	0	0	0	1	0	13	0	1	13	14	0	9	0	14	1	92.8571	0	64.2857	0
173	0	1	0	0	1	0	0	0	4	0	0	0	0	0	0	0	0	0	5	0	0	5	5	0	1	0	5	1	100	0	20	0
174	0	1	0	0	3	0	0	0	3	0	0	0	0	0	0	0	0	0	6	0	0	6	6	0	3	0	6	1	100	0	50	0
175	0	1	0	0	1	0	0	0	0	0	0	0	0	0	0	0	0	0	1	0	0	1	1	0	1	0	1	1	100	0	100	0
176	0	1	0	0	0	0	0	0	0	0	0	0	0	0	0	0	0	0	0	0	0	0	0	0	0	0	0	1	#DIV/0!	#DIV/0!	#DIV/0!	#DIV/0!
177	0	1	0	0	1	0	0	0	2	0	0	0	0	0	0	0	0	0	3	0	0	3	3	0	1	0	3	1	100	0	33.3333	0
178	0	1	0	0	2	0	1	0	5	0	0	0	0	0	0	0	0	0	7	1	0	8	7	1	3	0	8	1	100	12.5	37.5	0
179	0	1	0	0	4	0	2	0	8	0	0	0	0	0	0	0	0	0	12	2	0	14	12	2	6	0	14	1	100	14.2857	42.8571	0
180	0	1	0	0	4	0	0	0	1	0	0	0	0	0	0	0	0	0	5	0	0	5	5	0	4	0	5	1	100	0	80	0
181	0	1	0	0	1	0	0	0	0	0	0	0	0	0	0	0	0	0	1	0	0	1	1	0	1	0	1	1	100	0	100	0
182	0	1	0	0	0	0	0	0	1	0	0	0	0	0	0	0	0	0	1	0	0	1	1	0	0	0	1	1	100	0	0	0
183	0	1	0	0	0	0	0	0	0	0	0	0	0	0	0	0	0	0	0	0	0	0	0	0	0	0	0	1	#DIV/0!	#DIV/0!	#DIV/0!	#DIV/0!
184	0	1	0	0	1	0	0	0	1	0	0	0	0	0	0	0	0	0	2	0	0	2	2	0	1	0	2	1	100	0	50	0
185	0	1	0	0	4	1	0	0	0	0	0	0	0	0	0	0	0	1	4	0	1	4	4	1	5	0	5	1	80	20	100	0
186	0	1	0	0	0	0	0	0	0	0	0	0	0	0	0	0	0	0	0	0	0	0	0	0	0	0	0	1	#DIV/0!	#DIV/0!	#DIV/0!	#DIV/0!
187	0	1	0	0	1	0	0	0	2	0	0	0	0	0	0	0	0	0	3	0	0	3	3	0	1	0	3	1	100	0	33.3333	0
188	0	1	0	0	4	0	0	0	1	0	0	0	0	0	0	0	0	0	5	0	0	5	5	0	4	0	5	1	100	0	80	0
189	0	1	0	0	5	0	0	0	2	0	0	0	0	0	0	0	0	0	7	0	0	7	7	0	5	0	7	1	100	0	71.4286	0
190	0	1	0	1	0	0	0	0	3	0	0	0	0	0	0	0	1	0	3	0	1	3	4	0	1	0	4	1	75	0	25	0
191	0	1	0	1	0	0	0	0	1	0	0	0	0	0	0	0	1	0	1	0	1	1	2	0	1	0	2	1	50	0	50	0
192	0	1	0	0	1	0	0	0	1	0	0	0	0	0	0	0	0	0	2	0	0	2	2	0	1	0	2	1	100	0	50	0
193	0	1	0	0	1	0	0	0	0	0	0	0	0	0	0	0	0	0	1	0	0	1	1	0	1	0	1	1	100	0	100	0
194	0	1	0	0	0	0	0	0	0	0	0	0	0	0	0	0	0	0	0	0	0	0	0	0	0	0	0	1	#DIV/0!	#DIV/0!	#DIV/0!	#DIV/0!
195	0	1	0	0	1	0	0	0	1	0	0	0	0	0	0	0	0	0	2	0	0	2	2	0	1	0	2	1	100	0	50	0
196	0	1	0	0	2	0	0	0	0	0	0	0	0	0	0	0	0	0	2	0	0	2	2	0	2	0	2	1	100	0	100	0
197	0	1	0	0	0	0	0	0	0	0	0	0	0	0	0	0	0	0	0	0	0	0	0	0	0	0	0	1	#DIV/0!	#DIV/0!	#DIV/0!	#DIV/0!
198	0	1	0	0	0	0	1	0	3	0	0	0	0	0	0	0	0	0	3	1	0	4	3	1	1	0	4	1	100	25	25	0
199	0	1	0	0	1	0	0	0	1	0	0	0	0	0	0	0	0	0	2	0	0	2	2	0	1	0	2	1	100	0	50	0
200	0	1	0	0	1	0	0	0	0	0	0	0	0	0	0	0	0	0	1	0	0	1	1	0	1	0	1	1	100	0	100	0
201	0	1	0	0	1	0	0	0	3	0	0	0	0	0	0	0	0	0	4	0	0	4	4	0	1	0	4	1	100	0	25	0
202	0	1	0	0	1	0	0	0	1	0	0	0	0	0	0	0	0	0	2	0	0	2	2	0	1	0	2	1	100	0	50	0
203	0	1	0	0	0	0	0	0	0	0	0	0	0	0	0	0	0	0	0	0	0	0	0	0	0	0	0	1	#DIV/0!	#DIV/0!	#DIV/0!	#DIV/0!
204	0	1	0	0	2	0	0	0	0	0	0	0	0	0	0	0	0	0	2	0	0	2	2	0	2	0	2	1	100	0	100	0
205	0	1	0	0	0	0	0	0	0	0	0	0	0	0	0	0	0	0	0	0	0	0	0	0	0	0	0	1	#DIV/0!	#DIV/0!	#DIV/0!	#DIV/0!
206	0	1	0	0	1	0	0	0	1	0	0	0	0	0	0	0	0	0	2	0	0	2	2	0	1	0	2	1	100	0	50	0
207	0	1	0	1	2	0	0	0	2	0	0	0	0	0	0	0	1	0	4	0	1	4	5	0	3	0	5	1	80	0	60	0
208	0	1	0	0	1	0	1	0	1	0	0	0	0	0	0	0	0	0	2	1	0	3	2	1	2	0	3	1	100	33.3333	66.6667	0
209	0	1	0	1	3	0	0	0	4	0	0	0	0	0	0	0	1	0	7	0	1	7	8	0	4	0	8	1	87.5	0	50	0
210	0	1	0	0	0	0	0	1	1	0	0	0	0	0	0	0	1	0	1	0	1	1	2	0	0	0	2	1	50	0	0	0
211	0	1	0	0	0	0	0	0	0	0	0	0	0	0	0	0	0	0	0	0	0	0	0	0	0	0	0	1	#DIV/0!	#DIV/0!	#DIV/0!	#DIV/0!
212	0	1	0	0	0	0	0	0	0	0	0	0	0	0	0	0	0	0	0	0	0	0	0	0	0	0	0	1	#DIV/0!	#DIV/0!	#DIV/0!	#DIV/0!
213	0	1	0	0	1	0	0	0	0	0	0	0	0	0	0	0	0	0	1	0	0	1	1	0	1	0	1	1	100	0	100	0
214	0	1	0	0	1	0	0	0	1	0	0	0	0	0	0	0	0	0	2	0	0	2	2	0	1	0	2	1	100	0	50	0
215	0	1	0	0	0	0	0	0	0	0	0	0	0	0	0	0	0	0	0	0	0	0	0	0	0	0	0	1	#DIV/0!	#DIV/0!	#DIV/0!	#DIV/0!
216	0	1	0	0	1	0	0	0	0	0	0	0	0	0	0	0	0	0	1	0	0	1	1	0	1	0	1	1	100	0	100	0
217	0	1	0	0	0	0	0	0	0	0	0	0	0	0	0	0	0	0	0	0	0	0	0	0	0	0	0	1	#DIV/0!	#DIV/0!	#DIV/0!	#DIV/0!
218	0	1	0	0	0	0	0	0	0	0	0	0	0	0	0	0	0	0	0	0	0	0	0	0	0	0	0	1	#DIV/0!	#DIV/0!	#DIV/0!	#DIV/0!
219	0	1	0	0	0	0	0	0	0	0	0	0	0	0	0	0	0	0	0	0	0	0	0	0	0	0	0	1	#DIV/0!	#DIV/0!	#DIV/0!	#DIV/0!
220	0	1	0	0	0	0	0	0	0	0	0	0	0	0	0	0	0	0	0	0	0	0	0	0	0	0	0	1	#DIV/0!	#DIV/0!	#DIV/0!	#DIV/0!
221	0	1	0	0	0	0	0	0	0	0	0	0	0	0	0	0	0	0	0	0	0	0	0	0	0	0	0	1	#DIV/0!	#DIV/0!	#DIV/0!	#DIV/0!
222	0	1	0	0	1	0	0	0	0	0	0	0	0	0	0	0	0	0	1	0	0	1	1	0	1	0	1	1	100	0	100	0
223	0	1	0	0	1	0	0	0	1	0	0	0	0	0	0	0	0	0	2	0	0	2	2	0	1	0	2	1	100	0	50	0
224	0	1	0	0	1	0	0	0	0	0	0	0	0	0	0	0	0	0	1	0	0	1	1	0	1	0	1	1	100	0	100	0
225	0	1	0	0	0	0	0	0	1	0	0	0	0	0	0	0	0	0	1	0	0	1	1	0	0	0	1	1	100	0	0	0
226	0	1	0	0	1	0	0	0	1	0	0	0	0	0	0	0	0	0	2	0	0	2	2	0	1	0	2	1	100	0	50	0
227	0	1	0	0	2	0	0	0	0	0	0	0	0	0	0	0	0	0	2	0	0	2	2	0	2	0	2	1	100	0	100	0
228	0	1	0	0	0	0	0	0	0	0	0	0	0	0	0	0	0	0	0	0	0	0	0	0	0	0	0	1	#DIV/0!	#DIV/0!	#DIV/0!	#DIV/0!
229	0	1	0	0	0	0	0	0	0	0	0	0	0	0	0	0	0	0	0	0	0	0	0	0	0	0	0	1	#DIV/0!	#DIV/0!	#DIV/0!	#DIV/0!
230	0	1	0	0	1	0	0	0	1	0	0	0	0	0	0	0	0	0	2	0	0	2	2	0	1	0	2	1	100	0	50	0
231	0	1	0	0	1	0	0	0	3	0	0	0	0	0	0	0	0	0	4	0	0	4	4	0	1	0	4	1	100	0	25	0
232	0	1	0	1	2	0	0	0	6	0	0	0	0	0	0	0	1	0	8	0	1	8	9	0	3	0	9	1	88.8889	0	33.3333	0
233	0	1	0	0	4	0	0	0	0	0	0	0	0	0	0	0	0	0	4	0	0	4	4	0	4	0	4	1	100	0	100	0
234	0	1	0	1	4	0	1	0	19	0	0	0	0	0	0	0	1	0	23	1	1	24	24	1	6	0	25	1	96	4	24	0
235	0	1	0	0	5	0	0	2	0	0	0	0	0	0	0	0	2	0	5	0	2	5	7	0	5	0	7	1	71.4286	0	71.4286	0
236	0	1	0	0	2	0	0	0	1	0	0	0	0	0	0	0	0	0	3	0	0	3	3	0	2	0	3	1	100	0	66.6667	0
237	0	1	0	0	0	0	0	0	2	0	0	0	0	0	0	0	0	0	2	0	0	2	2	0	0	0	2	1	100	0	0	0
238	0	1	0	0	0	0	0	0	1	0	0	0	0	0	0	0	0	0	1	0	0	1	1	0	0	0	1	1	100	0	0	0
239	0	1	0	0	0	0	0	0	0	0	0	0	0	0	0	0	0	0	0	0	0	0	0	0	0	0	0	1	#DIV/0!	#DIV/0!	#DIV/0!	#DIV/0!
240	0	1	0	0	1	0	0	0	1	0	0	0	0	0	0	0	0	0	2	0	0	2	2	0	1	0	2	1	100	0	50	0
241	0	1	0	13	94	1	7	14	92	0	0	0	0	0	0	0	27	1	186	7	28	193	213	8	115	0	221	1	87.3303	3.61991	52.0362	0
242	0	1	0	0	59	0	2	0	57	0	0	0	0	0	0	0	0	0	116	2	0	118	116	2	61	0	118	1	100	1.69492	51.6949	0
122	0	2	0	0	2	2	12	0	14	0	1	0	0	0	0	1	0	2	16	13	2	29	16	15	16	0	31	1	93.5484	48.3871	51.6129	0
123	0	2	0	0	3	2	13	2	13	0	4	0	0	0	0	4	2	2	16	17	4	33	18	19	18	0	37	1	89.1892	51.3514	48.6486	0
124	0	2	0	0	5	4	16	1	19	0	0	0	0	0	0	0	1	4	24	16	5	40	25	20	25	0	45	1	88.8889	44.4444	55.5556	0
125	0	2	0	0	4	0	18	0	21	0	1	0	0	0	0	1	0	0	25	19	0	44	25	19	22	0	44	1	100	43.1818	50	0
126	0	2	0	17	7	4	8	11	10	0	1	0	0	0	0	1	28	4	17	9	32	26	45	13	36	0	58	1	44.8276	22.4138	62.069	0
127	0	2	0	0	9	0	18	0	27	1	0	0	0	0	0	1	0	1	36	18	1	54	36	19	27	0	55	1	98.1818	34.5455	49.0909	0
128	0	2	0	0	11	3	10	3	14	0	0	0	0	0	0	0	3	3	25	10	6	35	28	13	24	0	41	1	85.3659	31.7073	58.5366	0
129	0	2	0	1	0	4	5	3	5	0	0	0	0	0	0	0	4	4	5	5	8	10	9	9	10	0	18	1	55.5556	50	55.5556	0
130	0	2	0	0	3	0	13	0	15	0	1	0	0	0	0	1	0	0	18	14	0	32	18	14	16	0	32	1	100	43.75	50	0
131	0	2	0	0	6	1	10	1	12	0	0	0	0	0	0	0	1	1	18	10	2	28	19	11	17	0	30	1	93.3333	36.6667	56.6667	0
132	0	2	0	0	14	3	9	3	11	3	2	0	0	0	0	5	3	6	25	11	9	36	28	17	26	0	45	1	80	37.7778	57.7778	0
133	0	2	0	1	7	2	23	1	23	1	0	0	0	0	0	1	2	3	30	23	5	53	32	26	33	0	58	1	91.3793	44.8276	56.8966	0
134	0	2	0	0	0	5	30	3	30	3	1	0	0	0	0	4	3	8	30	31	11	61	33	39	35	0	72	1	84.7222	54.1667	48.6111	0
135	0	2	0	0	0	0	8	0	8	0	2	0	0	0	0	2	0	0	8	10	0	18	8	10	8	0	18	1	100	55.5556	44.4444	0
136	0	2	0	2	0	3	29	3	32	0	1	0	0	0	0	1	5	3	32	30	8	62	37	33	34	0	70	1	88.5714	47.1429	48.5714	0
137	0	2	0	3	7	0	0	1	1	0	0	0	0	0	0	0	4	0	8	0	4	8	12	0	10	0	12	1	66.6667	0	83.3333	0
138	0	2	0	0	2	1	12	0	20	0	1	0	0	0	0	1	0	1	22	13	1	35	22	14	15	0	36	1	97.2222	38.8889	41.6667	0
139	0	2	0	0	1	2	6	2	5	0	0	0	0	0	0	0	2	2	6	6	4	12	8	8	9	0	16	1	75	50	56.25	0
140	0	2	0	0	1	0	0	0	0	0	0	0	0	0	0	0	0	0	1	0	0	1	1	0	1	0	1	1	100	0	100	0
141	0	2	0	1	0	2	7	2	7	0	0	0	0	0	0	0	3	2	7	7	5	14	10	9	10	0	19	1	73.6842	47.3684	52.6316	0
142	0	2	0	0	3	3	4	2	5	0	0	0	0	0	0	0	2	3	8	4	5	12	10	7	10	0	17	1	70.5882	41.1765	58.8235	0
143	0	2	0	0	3	0	1	0	2	0	0	0	0	0	0	0	0	0	5	1	0	6	5	1	4	0	6	1	100	16.6667	66.6667	0
144	0	2	0	0	1	0	5	0	5	0	0	0	0	0	0	0	0	0	6	5	0	11	6	5	6	0	11	1	100	45.4545	54.5455	0
145	0	2	0	0	1	1	2	1	3	0	0	0	0	0	0	0	1	1	4	2	2	6	5	3	4	0	8	1	75	37.5	50	0
146	0	2	0	0	5	0	4	0	3	0	3	0	0	0	0	3	0	0	8	7	0	15	8	7	9	0	15	1	100	46.6667	60	0
147	0	2	0	0	2	0	20	0	22	0	0	0	0	0	0	0	0	0	24	20	0	44	24	20	22	0	44	1	100	45.4545	50	0
148	0	2	0	0	5	1	7	2	5	0	2	0	0	0	0	2	2	1	10	9	3	19	12	10	13	0	22	1	86.3636	45.4545	59.0909	0
149	0	2	0	0	0	1	6	1	6	0	1	0	0	0	0	1	1	1	6	7	2	13	7	8	7	0	15	1	86.6667	53.3333	46.6667	0
150	0	2	0	0	0	0	1	0	3	0	0	0	0	0	0	0	0	0	3	1	0	4	3	1	1	0	4	1	100	25	25	0
151	0	2	0	0	1	0	4	0	4	0	0	0	0	0	0	0	0	0	5	4	0	9	5	4	5	0	9	1	100	44.4444	55.5556	0
152	0	2	0	0	1	1	2	1	4	0	0	0	0	0	0	0	1	1	5	2	2	7	6	3	4	0	9	1	77.7778	33.3333	44.4444	0
153	0	2	0	0	6	0	1	0	3	0	0	0	0	0	0	0	0	0	9	1	0	10	9	1	7	0	10	1	100	10	70	0
154	0	2	0	0	0	0	3	0	5	0	2	0	0	0	0	2	0	0	5	5	0	10	5	5	3	0	10	1	100	50	30	0
155	0	2	0	0	0	0	0	0	2	0	0	0	0	0	0	0	0	0	2	0	0	2	2	0	0	0	2	1	100	0	0	0
156	0	2	0	0	0	0	0	0	0	0	0	0	0	0	0	0	0	0	0	0	0	0	0	0	0	0	0	1	#DIV/0!	#DIV/0!	#DIV/0!	#DIV/0!
157	0	2	0	0	0	0	2	1	2	0	0	0	0	0	0	0	1	0	2	2	1	4	3	2	2	0	5	1	80	40	40	0
158	0	2	0	0	1	0	0	0	1	0	0	0	0	0	0	0	0	0	2	0	0	2	2	0	1	0	2	1	100	0	50	0
159	0	2	0	0	0	2	3	0	5	0	0	0	0	0	0	0	0	2	5	3	2	8	5	5	5	0	10	1	80	50	50	0
160	0	2	0	0	4	0	0	0	0	0	0	0	0	0	0	0	0	0	4	0	0	4	4	0	4	0	4	1	100	0	100	0
161	0	2	0	0	0	0	3	0	3	0	0	0	0	0	0	0	0	0	3	3	0	6	3	3	3	0	6	1	100	50	50	0
162	0	2	0	1	0	0	1	0	2	0	0	0	0	0	0	0	1	0	2	1	1	3	3	1	2	0	4	1	75	25	50	0
163	0	2	0	0	7	4	5	4	12	0	1	0	0	0	0	1	4	4	19	6	8	25	23	10	16	0	33	1	75.7576	30.303	48.4848	0
164	0	2	0	0	5	0	5	0	5	0	0	0	0	0	0	0	0	0	10	5	0	15	10	5	10	0	15	1	100	33.3333	66.6667	0
165	0	2	0	0	0	0	5	0	5	0	0	0	0	0	0	0	0	0	5	5	0	10	5	5	5	0	10	1	100	50	50	0
166	0	2	0	0	2	0	2	0	5	0	0	0	0	0	0	0	0	0	7	2	0	9	7	2	4	0	9	1	100	22.2222	44.4444	0
167	0	2	0	0	0	0	1	0	1	0	0	0	0	0	0	0	0	0	1	1	0	2	1	1	1	0	2	1	100	50	50	0
168	0	2	0	0	3	0	3	0	4	0	1	0	0	0	0	1	0	0	7	4	0	11	7	4	6	0	11	1	100	36.3636	54.5455	0
169	0	2	0	0	1	1	0	1	1	0	0	0	0	0	0	0	1	1	2	0	2	2	3	1	2	0	4	1	50	25	50	0
170	0	2	0	0	2	0	0	0	5	0	0	0	0	0	0	0	0	0	7	0	0	7	7	0	2	0	7	1	100	0	28.5714	0
171	0	2	0	0	2	0	3	0	3	0	0	0	0	0	0	0	0	0	5	3	0	8	5	3	5	0	8	1	100	37.5	62.5	0
172	0	2	0	0	1	0	5	0	10	0	0	0	0	0	0	0	0	0	11	5	0	16	11	5	6	0	16	1	100	31.25	37.5	0
173	0	2	0	0	0	0	0	0	0	0	0	0	0	0	0	0	0	0	0	0	0	0	0	0	0	0	0	1	#DIV/0!	#DIV/0!	#DIV/0!	#DIV/0!
174	0	2	0	0	2	0	1	0	1	0	0	0	0	0	0	0	0	0	3	1	0	4	3	1	3	0	4	1	100	25	75	0
175	0	2	0	0	2	0	0	0	0	0	0	0	0	0	0	0	0	0	2	0	0	2	2	0	2	0	2	1	100	0	100	0
176	0	2	0	0	1	0	0	0	0	0	0	0	0	0	0	0	0	0	1	0	0	1	1	0	1	0	1	1	100	0	100	0
177	0	2	0	0	1	0	3	0	4	0	0	0	0	0	0	0	0	0	5	3	0	8	5	3	4	0	8	1	100	37.5	50	0
178	0	2	0	0	0	0	2	0	4	0	0	0	0	0	0	0	0	0	4	2	0	6	4	2	2	0	6	1	100	33.3333	33.3333	0
179	0	2	0	0	0	0	1	0	3	0	0	0	0	0	0	0	0	0	3	1	0	4	3	1	1	0	4	1	100	25	25	0
180	0	2	0	0	0	0	1	0	3	0	0	0	0	0	0	0	0	0	3	1	0	4	3	1	1	0	4	1	100	25	25	0
181	0	2	0	0	3	0	3	0	4	0	0	0	0	0	0	0	0	0	7	3	0	10	7	3	6	0	10	1	100	30	60	0
182	0	2	0	0	0	1	0	2	0	0	0	0	0	0	0	0	2	1	0	0	3	0	2	1	1	0	3	1	0	33.3333	33.3333	0
183	0	2	0	0	0	0	0	0	1	0	0	0	0	0	0	0	0	0	1	0	0	1	1	0	0	0	1	1	100	0	0	0
184	0	2	0	0	1	0	1	0	1	0	0	0	0	0	0	0	0	0	2	1	0	3	2	1	2	0	3	1	100	33.3333	66.6667	0
185	0	2	0	0	1	0	0	0	1	0	0	0	0	0	0	0	0	0	2	0	0	2	2	0	1	0	2	1	100	0	50	0
186	0	2	0	0	0	0	0	0	0	0	0	0	0	0	0	0	0	0	0	0	0	0	0	0	0	0	0	1	#DIV/0!	#DIV/0!	#DIV/0!	#DIV/0!
187	0	2	0	0	4	0	0	0	0	0	0	0	0	0	0	0	0	0	4	0	0	4	4	0	4	0	4	1	100	0	100	0
188	0	2	0	0	1	0	0	0	1	0	0	0	0	0	0	0	0	0	2	0	0	2	2	0	1	0	2	1	100	0	50	0
189	0	2	0	0	0	0	0	0	0	0	0	0	0	0	0	0	0	0	0	0	0	0	0	0	0	0	0	1	#DIV/0!	#DIV/0!	#DIV/0!	#DIV/0!
190	0	2	0	0	0	0	0	0	1	0	0	0	0	0	0	0	0	0	1	0	0	1	1	0	0	0	1	1	100	0	0	0
191	0	2	0	0	0	0	5	0	6	0	0	0	0	0	0	0	0	0	6	5	0	11	6	5	5	0	11	1	100	45.4545	45.4545	0
192	0	2	0	0	0	0	0	0	0	0	0	0	0	0	0	0	0	0	0	0	0	0	0	0	0	0	0	1	#DIV/0!	#DIV/0!	#DIV/0!	#DIV/0!
193	0	2	0	1	2	0	1	0	1	0	0	0	0	0	0	0	1	0	3	1	1	4	4	1	4	0	5	1	80	20	80	0
194	0	2	0	0	2	0	0	1	0	0	0	0	0	0	0	0	1	0	2	0	1	2	3	0	2	0	3	1	66.6667	0	66.6667	0
195	0	2	0	0	0	0	0	0	0	0	0	0	0	0	0	0	0	0	0	0	0	0	0	0	0	0	0	1	#DIV/0!	#DIV/0!	#DIV/0!	#DIV/0!
196	0	2	0	0	0	0	0	0	0	0	0	0	0	0	0	0	0	0	0	0	0	0	0	0	0	0	0	1	#DIV/0!	#DIV/0!	#DIV/0!	#DIV/0!
197	0	2	0	0	0	0	3	0	5	0	0	0	0	0	0	0	0	0	5	3	0	8	5	3	3	0	8	1	100	37.5	37.5	0
198	0	2	0	1	1	0	0	0	0	0	0	0	0	0	0	0	1	0	1	0	1	1	2	0	2	0	2	1	50	0	100	0
199	0	2	0	0	1	0	2	0	6	0	0	0	0	0	0	0	0	0	7	2	0	9	7	2	3	0	9	1	100	22.2222	33.3333	0
200	0	2	0	0	0	0	1	0	1	0	0	0	0	0	0	0	0	0	1	1	0	2	1	1	1	0	2	1	100	50	50	0
201	0	2	0	0	0	0	0	0	0	0	0	0	0	0	0	0	0	0	0	0	0	0	0	0	0	0	0	1	#DIV/0!	#DIV/0!	#DIV/0!	#DIV/0!
202	0	2	0	0	0	0	0	0	2	0	0	0	0	0	0	0	0	0	2	0	0	2	2	0	0	0	2	1	100	0	0	0
203	0	2	0	0	2	0	0	0	0	0	0	0	0	0	0	0	0	0	2	0	0	2	2	0	2	0	2	1	100	0	100	0
204	0	2	0	0	0	0	0	0	0	0	0	0	0	0	0	0	0	0	0	0	0	0	0	0	0	0	0	1	#DIV/0!	#DIV/0!	#DIV/0!	#DIV/0!
205	0	2	0	0	0	0	0	0	2	0	0	0	0	0	0	0	0	0	2	0	0	2	2	0	0	0	2	1	100	0	0	0
206	0	2	0	0	0	0	0	0	0	0	0	0	0	0	0	0	0	0	0	0	0	0	0	0	0	0	0	1	#DIV/0!	#DIV/0!	#DIV/0!	#DIV/0!
207	0	2	0	0	1	0	1	0	5	0	0	0	0	0	0	0	0	0	6	1	0	7	6	1	2	0	7	1	100	14.2857	28.5714	0
208	0	2	0	0	1	0	0	0	1	0	0	0	0	0	0	0	0	0	2	0	0	2	2	0	1	0	2	1	100	0	50	0
209	0	2	0	0	0	0	0	0	0	0	0	0	0	0	0	0	0	0	0	0	0	0	0	0	0	0	0	1	#DIV/0!	#DIV/0!	#DIV/0!	#DIV/0!
210	0	2	0	2	2	0	0	0	3	0	0	0	0	0	0	0	2	0	5	0	2	5	7	0	4	0	7	1	71.4286	0	57.1429	0
211	0	2	0	0	0	0	9	0	10	0	0	0	0	0	0	0	0	0	10	9	0	19	10	9	9	0	19	1	100	47.3684	47.3684	0
212	0	2	0	0	1	0	1	0	1	0	0	0	0	0	0	0	0	0	2	1	0	3	2	1	2	0	3	1	100	33.3333	66.6667	0
213	0	2	0	0	1	0	0	0	0	0	0	0	0	0	0	0	0	0	1	0	0	1	1	0	1	0	1	1	100	0	100	0
214	0	2	0	0	1	0	0	0	0	0	0	0	0	0	0	0	0	0	1	0	0	1	1	0	1	0	1	1	100	0	100	0
215	0	2	0	0	1	0	1	0	3	0	0	0	0	0	0	0	0	0	4	1	0	5	4	1	2	0	5	1	100	20	40	0
216	0	2	0	0	0	0	0	0	0	0	0	0	0	0	0	0	0	0	0	0	0	0	0	0	0	0	0	1	#DIV/0!	#DIV/0!	#DIV/0!	#DIV/0!
217	0	2	0	0	0	0	0	0	0	0	0	0	0	0	0	0	0	0	0	0	0	0	0	0	0	0	0	1	#DIV/0!	#DIV/0!	#DIV/0!	#DIV/0!
218	0	2	0	1	1	0	0	0	0	0	0	0	0	0	0	0	1	0	1	0	1	1	2	0	2	0	2	1	50	0	100	0
219	0	2	0	0	0	0	0	0	0	0	0	0	0	0	0	0	0	0	0	0	0	0	0	0	0	0	0	1	#DIV/0!	#DIV/0!	#DIV/0!	#DIV/0!
220	0	2	0	0	1	0	0	0	0	0	0	0	0	0	0	0	0	0	1	0	0	1	1	0	1	0	1	1	100	0	100	0
221	0	2	0	0	0	0	0	0	0	0	0	0	0	0	0	0	0	0	0	0	0	0	0	0	0	0	0	1	#DIV/0!	#DIV/0!	#DIV/0!	#DIV/0!
222	0	2	0	0	0	0	0	0	0	0	0	0	0	0	0	0	0	0	0	0	0	0	0	0	0	0	0	1	#DIV/0!	#DIV/0!	#DIV/0!	#DIV/0!
223	0	2	0	0	0	0	0	0	0	0	0	0	0	0	0	0	0	0	0	0	0	0	0	0	0	0	0	1	#DIV/0!	#DIV/0!	#DIV/0!	#DIV/0!
224	0	2	0	0	0	0	0	0	0	0	0	0	0	0	0	0	0	0	0	0	0	0	0	0	0	0	0	1	#DIV/0!	#DIV/0!	#DIV/0!	#DIV/0!
225	0	2	0	0	0	0	0	0	1	0	0	0	0	0	0	0	0	0	1	0	0	1	1	0	0	0	1	1	100	0	0	0
226	0	2	0	0	0	0	1	0	2	0	0	0	0	0	0	0	0	0	2	1	0	3	2	1	1	0	3	1	100	33.3333	33.3333	0
227	0	2	0	0	1	0	0	0	2	0	0	0	0	0	0	0	0	0	3	0	0	3	3	0	1	0	3	1	100	0	33.3333	0
228	0	2	0	0	0	0	0	0	0	0	0	0	0	0	0	0	0	0	0	0	0	0	0	0	0	0	0	1	#DIV/0!	#DIV/0!	#DIV/0!	#DIV/0!
229	0	2	0	0	0	1	0	1	0	0	0	0	0	0	0	0	1	1	0	0	2	0	1	1	1	0	2	1	0	50	50	0
230	0	2	0	0	1	0	1	0	2	0	0	0	0	0	0	0	0	0	3	1	0	4	3	1	2	0	4	1	100	25	50	0
231	0	2	0	0	1	0	0	0	0	0	0	0	0	0	0	0	0	0	1	0	0	1	1	0	1	0	1	1	100	0	100	0
232	0	2	0	0	2	0	0	0	1	0	0	0	0	0	0	0	0	0	3	0	0	3	3	0	2	0	3	1	100	0	66.6667	0
233	0	2	0	0	3	0	3	1	17	0	0	0	0	0	0	0	1	0	20	3	1	23	21	3	6	0	24	1	95.8333	12.5	25	0
234	0	2	0	0	0	0	1	0	7	0	0	0	0	0	0	0	0	0	7	1	0	8	7	1	1	0	8	1	100	12.5	12.5	0
235	0	2	0	0	1	0	0	0	1	0	0	0	0	0	0	0	0	0	2	0	0	2	2	0	1	0	2	1	100	0	50	0
236	0	2	0	0	1	0	0	0	0	0	0	0	0	0	0	0	0	0	1	0	0	1	1	0	1	0	1	1	100	0	100	0
237	0	2	0	0	0	0	0	0	0	0	0	0	0	0	0	0	0	0	0	0	0	0	0	0	0	0	0	1	#DIV/0!	#DIV/0!	#DIV/0!	#DIV/0!
238	0	2	0	0	0	0	0	0	3	0	0	0	0	0	0	0	0	0	3	0	0	3	3	0	0	0	3	1	100	0	0	0
239	0	2	0	0	1	0	0	0	0	0	0	0	0	0	0	0	0	0	1	0	0	1	1	0	1	0	1	1	100	0	100	0
240	0	2	0	1	3	0	0	1	4	0	0	0	0	0	0	0	2	0	7	0	2	7	9	0	4	0	9	1	77.7778	0	44.4444	0
241	0	2	0	10	76	1	26	1	88	0	0	0	0	0	0	0	11	1	164	26	12	190	175	27	113	0	202	1	94.0594	13.3663	55.9406	0
242	0	2	0	3	39	2	22	1	53	0	0	0	0	0	0	0	4	2	92	22	6	114	96	24	66	0	120	1	95	20	55	0
122	0	3	0	0	2	5	7	0	7	0	7	0	0	0	0	7	0	5	9	14	5	23	9	19	14	0	28	1	82.1429	67.8571	50	0
123	0	3	0	0	1	0	10	0	10	0	4	0	0	0	0	4	0	0	11	14	0	25	11	14	11	0	25	1	100	56	44	0
124	0	3	0	0	0	19	24	19	26	2	7	0	0	0	0	9	19	21	26	31	40	57	45	52	43	0	97	1	58.7629	53.6082	44.3299	0
125	0	3	0	0	3	0	9	0	8	0	0	0	0	0	0	0	0	0	11	9	0	20	11	9	12	0	20	1	100	45	60	0
126	0	3	0	2	0	24	3	17	3	4	3	0	0	0	0	7	19	28	3	6	47	9	22	34	29	0	56	1	16.0714	60.7143	51.7857	0
127	0	3	0	1	0	2	6	2	4	0	1	0	0	0	0	1	3	2	4	7	5	11	7	9	9	0	16	1	68.75	56.25	56.25	0
128	0	3	0	0	3	1	26	1	23	0	2	0	0	0	0	2	1	1	26	28	2	54	27	29	30	0	56	1	96.4286	51.7857	53.5714	0
129	0	3	0	0	2	4	9	3	8	1	2	0	0	0	0	3	3	5	10	11	8	21	13	16	15	0	29	1	72.4138	55.1724	51.7241	0
130	0	3	0	0	0	1	4	1	4	0	0	0	0	0	0	0	1	1	4	4	2	8	5	5	5	0	10	1	80	50	50	0
131	0	3	0	0	0	1	5	1	5	0	0	0	0	0	0	0	1	1	5	5	2	10	6	6	6	0	12	1	83.3333	50	50	0
132	0	3	0	0	1	1	4	1	4	0	1	0	0	0	0	1	1	1	5	5	2	10	6	6	6	0	12	1	83.3333	50	50	0
133	0	3	0	0	4	2	10	1	10	0	3	0	0	0	0	3	1	2	14	13	3	27	15	15	16	0	30	1	90	50	53.3333	0
134	0	3	0	0	0	0	18	0	14	0	1	0	0	0	0	1	0	0	14	19	0	33	14	19	18	0	33	1	100	57.5758	54.5455	0
135	0	3	0	0	0	0	21	0	20	0	1	0	0	0	0	1	0	0	20	22	0	42	20	22	21	0	42	1	100	52.381	50	0
136	0	3	0	0	1	4	20	3	19	1	0	0	0	0	0	1	3	5	20	20	8	40	23	25	25	0	48	1	83.3333	52.0833	52.0833	0
137	0	3	0	0	0	1	15	1	14	0	1	0	0	0	0	1	1	1	14	16	2	30	15	17	16	0	32	1	93.75	53.125	50	0
138	0	3	0	0	7	0	2	0	2	0	2	0	0	0	0	2	0	0	9	4	0	13	9	4	9	0	13	1	100	30.7692	69.2308	0
139	0	3	0	0	2	0	1	0	1	0	0	0	0	0	0	0	0	0	3	1	0	4	3	1	3	0	4	1	100	25	75	0
140	0	3	0	0	0	0	2	0	3	0	1	0	0	0	0	1	0	0	3	3	0	6	3	3	2	0	6	1	100	50	33.3333	0
141	0	3	0	0	0	0	6	0	6	0	0	0	0	0	0	0	0	0	6	6	0	12	6	6	6	0	12	1	100	50	50	0
142	0	3	0	0	8	2	8	2	8	0	2	0	0	0	0	2	2	2	16	10	4	26	18	12	18	0	30	1	86.6667	40	60	0
143	0	3	0	0	0	0	0	0	2	0	0	0	0	0	0	0	0	0	2	0	0	2	2	0	0	0	2	1	100	0	0	0
144	0	3	0	0	1	0	1	0	1	0	0	0	0	0	0	0	0	0	2	1	0	3	2	1	2	0	3	1	100	33.3333	66.6667	0
145	0	3	0	0	1	0	9	0	9	0	0	0	0	0	0	0	0	0	10	9	0	19	10	9	10	0	19	1	100	47.3684	52.6316	0
146	0	3	0	0	0	0	5	0	4	0	0	0	0	0	0	0	0	0	4	5	0	9	4	5	5	0	9	1	100	55.5556	55.5556	0
147	0	3	0	0	1	0	14	0	14	0	0	0	0	0	0	0	0	0	15	14	0	29	15	14	15	0	29	1	100	48.2759	51.7241	0
148	0	3	0	0	4	0	13	0	15	0	0	0	0	0	0	0	0	0	19	13	0	32	19	13	17	0	32	1	100	40.625	53.125	0
149	0	3	0	0	1	0	1	0	1	0	0	0	0	0	0	0	0	0	2	1	0	3	2	1	2	0	3	1	100	33.3333	66.6667	0
150	0	3	0	0	0	0	6	0	6	1	0	0	0	0	0	1	0	1	6	6	1	12	6	7	6	0	13	1	92.3077	53.8462	46.1538	0
151	0	3	0	0	0	0	2	0	2	0	1	0	0	0	0	1	0	0	2	3	0	5	2	3	2	0	5	1	100	60	40	0
152	0	3	0	0	3	0	6	0	6	0	0	0	0	0	0	0	0	0	9	6	0	15	9	6	9	0	15	1	100	40	60	0
153	0	3	0	0	1	1	6	2	6	0	0	0	0	0	0	0	2	1	7	6	3	13	9	7	8	0	16	1	81.25	43.75	50	0
154	0	3	0	0	4	1	4	1	4	0	0	0	0	0	0	0	1	1	8	4	2	12	9	5	9	0	14	1	85.7143	35.7143	64.2857	0
155	0	3	0	0	1	0	2	0	2	0	0	0	0	0	0	0	0	0	3	2	0	5	3	2	3	0	5	1	100	40	60	0
156	0	3	0	0	7	0	2	0	2	0	0	0	0	0	0	0	0	0	9	2	0	11	9	2	9	0	11	1	100	18.1818	81.8182	0
157	0	3	0	0	2	0	7	0	7	0	0	0	0	0	0	0	0	0	9	7	0	16	9	7	9	0	16	1	100	43.75	56.25	0
158	0	3	0	0	1	0	5	0	5	0	0	0	0	0	0	0	0	0	6	5	0	11	6	5	6	0	11	1	100	45.4545	54.5455	0
159	0	3	0	0	2	2	0	0	1	0	0	0	0	0	0	0	0	2	3	0	2	3	3	2	4	0	5	1	60	40	80	0
160	0	3	0	0	0	1	6	1	6	0	0	0	0	0	0	0	1	1	6	6	2	12	7	7	7	0	14	1	85.7143	50	50	0
161	0	3	0	0	3	0	0	0	0	0	0	0	0	0	0	0	0	0	3	0	0	3	3	0	3	0	3	1	100	0	100	0
162	0	3	0	1	0	0	2	0	2	0	0	0	0	0	0	0	1	0	2	2	1	4	3	2	3	0	5	1	80	40	60	0
163	0	3	0	0	8	1	10	1	15	0	1	0	0	0	0	1	1	1	23	11	2	34	24	12	19	0	36	1	94.4444	33.3333	52.7778	0
164	0	3	0	0	5	0	4	0	5	0	0	0	0	0	0	0	0	0	10	4	0	14	10	4	9	0	14	1	100	28.5714	64.2857	0
165	0	3	0	0	6	0	4	0	3	0	0	0	0	0	0	0	0	0	9	4	0	13	9	4	10	0	13	1	100	30.7692	76.9231	0
166	0	3	0	0	0	0	2	0	2	0	0	0	0	0	0	0	0	0	2	2	0	4	2	2	2	0	4	1	100	50	50	0
167	0	3	0	0	3	0	3	0	3	0	0	0	0	0	0	0	0	0	6	3	0	9	6	3	6	0	9	1	100	33.3333	66.6667	0
168	0	3	0	0	0	0	6	0	6	0	0	0	0	0	0	0	0	0	6	6	0	12	6	6	6	0	12	1	100	50	50	0
169	0	3	0	0	0	0	5	0	5	0	0	0	0	0	0	0	0	0	5	5	0	10	5	5	5	0	10	1	100	50	50	0
170	0	3	0	0	3	0	4	0	5	0	0	0	0	0	0	0	0	0	8	4	0	12	8	4	7	0	12	1	100	33.3333	58.3333	0
171	0	3	0	0	2	1	0	2	0	0	0	0	0	0	0	0	2	1	2	0	3	2	4	1	3	0	5	1	40	20	60	0
172	0	3	0	0	1	0	5	0	5	1	1	0	0	0	0	2	0	1	6	6	1	12	6	7	6	0	13	1	92.3077	53.8462	46.1538	0
173	0	3	0	0	0	0	0	0	0	0	0	0	0	0	0	0	0	0	0	0	0	0	0	0	0	0	0	1	#DIV/0!	#DIV/0!	#DIV/0!	#DIV/0!
174	0	3	0	0	1	0	4	0	4	0	0	0	0	0	0	0	0	0	5	4	0	9	5	4	5	0	9	1	100	44.4444	55.5556	0
175	0	3	0	0	0	0	0	0	0	0	0	0	0	0	0	0	0	0	0	0	0	0	0	0	0	0	0	1	#DIV/0!	#DIV/0!	#DIV/0!	#DIV/0!
176	0	3	0	0	1	0	1	0	1	0	0	0	0	0	0	0	0	0	2	1	0	3	2	1	2	0	3	1	100	33.3333	66.6667	0
177	0	3	0	0	1	0	0	0	1	0	0	0	0	0	0	0	0	0	2	0	0	2	2	0	1	0	2	1	100	0	50	0
178	0	3	0	0	1	0	0	0	0	0	0	0	0	0	0	0	0	0	1	0	0	1	1	0	1	0	1	1	100	0	100	0
179	0	3	0	0	0	1	5	1	5	0	1	0	0	0	0	1	1	1	5	6	2	11	6	7	6	0	13	1	84.6154	53.8462	46.1538	0
180	0	3	0	0	0	0	2	0	2	0	1	0	0	0	0	1	0	0	2	3	0	5	2	3	2	0	5	1	100	60	40	0
181	0	3	0	0	1	0	6	0	6	0	0	0	0	0	0	0	0	0	7	6	0	13	7	6	7	0	13	1	100	46.1538	53.8462	0
182	0	3	0	0	0	1	0	1	0	0	0	0	0	0	0	0	1	1	0	0	2	0	1	1	1	0	2	1	0	50	50	0
183	0	3	0	0	0	0	0	0	0	0	0	0	0	0	0	0	0	0	0	0	0	0	0	0	0	0	0	1	#DIV/0!	#DIV/0!	#DIV/0!	#DIV/0!
184	0	3	0	0	1	0	1	0	1	0	0	0	0	0	0	0	0	0	2	1	0	3	2	1	2	0	3	1	100	33.3333	66.6667	0
185	0	3	0	0	0	0	2	0	2	0	0	0	0	0	0	0	0	0	2	2	0	4	2	2	2	0	4	1	100	50	50	0
186	0	3	0	0	0	0	0	0	0	0	0	0	0	0	0	0	0	0	0	0	0	0	0	0	0	0	0	1	#DIV/0!	#DIV/0!	#DIV/0!	#DIV/0!
187	0	3	0	0	0	0	0	0	0	0	0	0	0	0	0	0	0	0	0	0	0	0	0	0	0	0	0	1	#DIV/0!	#DIV/0!	#DIV/0!	#DIV/0!
188	0	3	0	0	0	0	0	0	0	0	0	0	0	0	0	0	0	0	0	0	0	0	0	0	0	0	0	1	#DIV/0!	#DIV/0!	#DIV/0!	#DIV/0!
189	0	3	0	0	1	0	0	0	2	0	0	0	0	0	0	0	0	0	3	0	0	3	3	0	1	0	3	1	100	0	33.3333	0
190	0	3	0	0	0	1	3	1	3	0	0	0	0	0	0	0	1	1	3	3	2	6	4	4	4	0	8	1	75	50	50	0
191	0	3	0	0	0	0	1	0	2	0	0	0	0	0	0	0	0	0	2	1	0	3	2	1	1	0	3	1	100	33.3333	33.3333	0
192	0	3	0	0	1	1	1	1	1	0	0	0	0	0	0	0	1	1	2	1	2	3	3	2	3	0	5	1	60	40	60	0
193	0	3	0	0	1	0	1	0	2	0	0	0	0	0	0	0	0	0	3	1	0	4	3	1	2	0	4	1	100	25	50	0
194	0	3	0	0	0	0	0	0	0	0	0	0	0	0	0	0	0	0	0	0	0	0	0	0	0	0	0	1	#DIV/0!	#DIV/0!	#DIV/0!	#DIV/0!
195	0	3	0	0	1	0	1	0	1	0	0	0	0	0	0	0	0	0	2	1	0	3	2	1	2	0	3	1	100	33.3333	66.6667	0
196	0	3	0	0	1	0	0	0	0	0	0	0	0	0	0	0	0	0	1	0	0	1	1	0	1	0	1	1	100	0	100	0
197	0	3	0	0	0	1	2	1	2	0	0	0	0	0	0	0	1	1	2	2	2	4	3	3	3	0	6	1	66.6667	50	50	0
198	0	3	0	0	1	0	1	0	1	0	0	0	0	0	0	0	0	0	2	1	0	3	2	1	2	0	3	1	100	33.3333	66.6667	0
199	0	3	0	0	0	0	1	0	1	0	0	0	0	0	0	0	0	0	1	1	0	2	1	1	1	0	2	1	100	50	50	0
200	0	3	0	0	1	0	1	0	1	0	0	0	0	0	0	0	0	0	2	1	0	3	2	1	2	0	3	1	100	33.3333	66.6667	0
201	0	3	0	1	2	0	2	0	2	0	0	0	0	0	0	0	1	0	4	2	1	6	5	2	5	0	7	1	85.7143	28.5714	71.4286	0
202	0	3	0	0	0	0	1	0	2	0	0	0	0	0	0	0	0	0	2	1	0	3	2	1	1	0	3	1	100	33.3333	33.3333	0
203	0	3	0	0	2	0	1	0	2	0	1	0	0	0	0	1	0	0	4	2	0	6	4	2	3	0	6	1	100	33.3333	50	0
204	0	3	0	0	3	0	1	0	2	0	0	0	0	0	0	0	0	0	5	1	0	6	5	1	4	0	6	1	100	16.6667	66.6667	0
205	0	3	0	0	1	0	0	0	0	0	0	0	0	0	0	0	0	0	1	0	0	1	1	0	1	0	1	1	100	0	100	0
206	0	3	0	0	2	0	1	0	1	0	0	0	0	0	0	0	0	0	3	1	0	4	3	1	3	0	4	1	100	25	75	0
207	0	3	0	0	0	0	0	0	0	0	0	0	0	0	0	0	0	0	0	0	0	0	0	0	0	0	0	1	#DIV/0!	#DIV/0!	#DIV/0!	#DIV/0!
208	0	3	0	0	0	0	1	0	2	0	0	0	0	0	0	0	0	0	2	1	0	3	2	1	1	0	3	1	100	33.3333	33.3333	0
209	0	3	0	0	1	0	0	0	0	0	0	0	0	0	0	0	0	0	1	0	0	1	1	0	1	0	1	1	100	0	100	0
210	0	3	0	0	0	0	0	0	0	0	0	0	0	0	0	0	0	0	0	0	0	0	0	0	0	0	0	1	#DIV/0!	#DIV/0!	#DIV/0!	#DIV/0!
211	0	3	0	0	0	0	0	0	1	0	0	0	0	0	0	0	0	0	1	0	0	1	1	0	0	0	1	1	100	0	0	0
212	0	3	0	0	0	0	0	0	3	0	0	0	0	0	0	0	0	0	3	0	0	3	3	0	0	0	3	1	100	0	0	0
213	0	3	0	0	0	0	0	0	0	0	0	0	0	0	0	0	0	0	0	0	0	0	0	0	0	0	0	1	#DIV/0!	#DIV/0!	#DIV/0!	#DIV/0!
214	0	3	0	0	0	0	2	0	3	0	0	0	0	0	0	0	0	0	3	2	0	5	3	2	2	0	5	1	100	40	40	0
215	0	3	0	0	1	0	0	0	0	0	0	0	0	0	0	0	0	0	1	0	0	1	1	0	1	0	1	1	100	0	100	0
216	0	3	0	0	1	0	2	0	2	0	0	0	0	0	0	0	0	0	3	2	0	5	3	2	3	0	5	1	100	40	60	0
217	0	3	0	0	0	0	0	0	0	0	0	0	0	0	0	0	0	0	0	0	0	0	0	0	0	0	0	1	#DIV/0!	#DIV/0!	#DIV/0!	#DIV/0!
218	0	3	0	0	0	0	1	0	1	0	0	0	0	0	0	0	0	0	1	1	0	2	1	1	1	0	2	1	100	50	50	0
219	0	3	0	0	0	0	1	0	1	0	0	0	0	0	0	0	0	0	1	1	0	2	1	1	1	0	2	1	100	50	50	0
220	0	3	0	0	0	0	0	0	0	0	0	0	0	0	0	0	0	0	0	0	0	0	0	0	0	0	0	1	#DIV/0!	#DIV/0!	#DIV/0!	#DIV/0!
221	0	3	0	0	0	0	0	0	0	0	0	0	0	0	0	0	0	0	0	0	0	0	0	0	0	0	0	1	#DIV/0!	#DIV/0!	#DIV/0!	#DIV/0!
222	0	3	0	0	0	0	0	0	0	0	0	0	0	0	0	0	0	0	0	0	0	0	0	0	0	0	0	1	#DIV/0!	#DIV/0!	#DIV/0!	#DIV/0!
223	0	3	0	0	0	0	1	0	1	0	0	0	0	0	0	0	0	0	1	1	0	2	1	1	1	0	2	1	100	50	50	0
224	0	3	0	0	0	0	0	0	0	0	0	0	0	0	0	0	0	0	0	0	0	0	0	0	0	0	0	1	#DIV/0!	#DIV/0!	#DIV/0!	#DIV/0!
225	0	3	0	0	1	0	0	0	1	0	0	0	0	0	0	0	0	0	2	0	0	2	2	0	1	0	2	1	100	0	50	0
226	0	3	0	0	2	0	3	0	3	0	0	0	0	0	0	0	0	0	5	3	0	8	5	3	5	0	8	1	100	37.5	62.5	0
227	0	3	0	0	0	0	0	0	0	0	0	0	0	0	0	0	0	0	0	0	0	0	0	0	0	0	0	1	#DIV/0!	#DIV/0!	#DIV/0!	#DIV/0!
228	0	3	0	0	0	0	0	0	0	0	0	0	0	0	0	0	0	0	0	0	0	0	0	0	0	0	0	1	#DIV/0!	#DIV/0!	#DIV/0!	#DIV/0!
229	0	3	0	0	0	0	2	0	3	0	0	0	0	0	0	0	0	0	3	2	0	5	3	2	2	0	5	1	100	40	40	0
230	0	3	0	0	0	0	0	0	0	0	0	0	0	0	0	0	0	0	0	0	0	0	0	0	0	0	0	1	#DIV/0!	#DIV/0!	#DIV/0!	#DIV/0!
231	0	3	0	0	0	0	1	0	1	0	0	0	0	0	0	0	0	0	1	1	0	2	1	1	1	0	2	1	100	50	50	0
232	0	3	0	0	1	0	0	0	0	0	0	0	0	0	0	0	0	0	1	0	0	1	1	0	1	0	1	1	100	0	100	0
233	0	3	0	0	2	0	1	0	6	0	0	0	0	0	0	0	0	0	8	1	0	9	8	1	3	0	9	1	100	11.1111	33.3333	0
234	0	3	0	0	6	0	4	0	7	0	0	0	0	0	0	0	0	0	13	4	0	17	13	4	10	0	17	1	100	23.5294	58.8235	0
235	0	3	0	0	1	0	0	0	0	0	0	0	0	0	0	0	0	0	1	0	0	1	1	0	1	0	1	1	100	0	100	0
236	0	3	0	0	3	0	0	0	3	0	0	0	0	0	0	0	0	0	6	0	0	6	6	0	3	0	6	1	100	0	50	0
237	0	3	0	0	1	0	0	0	0	0	0	0	0	0	0	0	0	0	1	0	0	1	1	0	1	0	1	1	100	0	100	0
238	0	3	0	0	0	0	1	0	1	0	0	0	0	0	0	0	0	0	1	1	0	2	1	1	1	0	2	1	100	50	50	0
239	0	3	0	0	1	0	0	0	1	0	0	0	0	0	0	0	0	0	2	0	0	2	2	0	1	0	2	1	100	0	50	0
240	0	3	0	0	0	0	0	0	0	0	0	0	0	0	0	0	0	0	0	0	0	0	0	0	0	0	0	1	#DIV/0!	#DIV/0!	#DIV/0!	#DIV/0!
241	0	3	0	4	69	3	96	7	115	1	1	0	0	0	0	2	11	4	184	97	15	281	195	101	172	0	296	1	94.9324	34.1216	58.1081	0
242	0	3	0	0	40	0	34	0	49	0	0	0	0	0	0	0	0	0	89	34	0	123	89	34	74	0	123	1	100	27.6423	60.1626	0
122	0	4	0	0	0	0	1	0	1	0	0	0	0	0	0	0	0	1	1	0	2	1	1	1	0	2	2	1	100	50	50	0
123	0	4	0	0	3	1	3	1	3	0	0	0	0	0	0	0	1	1	6	3	2	9	7	4	7	0	11	1	81.8182	36.3636	63.6364	0
124	0	4	0	0	0	0	1	0	1	0	0	0	0	0	0	0	0	1	1	0	2	1	1	1	0	2	2	1	100	50	50	0
125	0	4	0	0	0	0	0	0	1	0	0	0	0	0	0	0	0	0	1	0	0	1	1	0	0	0	1	1	100	0	0	0
126	0	4	0	0	0	0	0	0	0	0	0	0	0	0	0	0	0	0	0	0	0	0	0	0	0	0	0	1	#DIV/0!	#DIV/0!	#DIV/0!	#DIV/0!
127	0	4	0	0	0	0	0	0	0	0	0	0	0	0	0	0	0	0	0	0	0	0	0	0	0	0	0	1	#DIV/0!	#DIV/0!	#DIV/0!	#DIV/0!
128	0	4	0	0	0	0	1	0	2	0	0	0	0	0	0	0	0	2	1	0	3	2	1	1	0	3	3	1	100	33.3333	33.3333	0
129	0	4	0	0	0	0	1	0	1	0	0	0	0	0	0	0	0	0	1	1	0	2	1	1	1	0	2	1	100	50	50	0
130	0	4	0	0	0	0	0	0	0	0	0	0	0	0	0	0	0	0	0	0	0	0	0	0	0	0	0	1	#DIV/0!	#DIV/0!	#DIV/0!	#DIV/0!
131	0	4	0	0	0	2	0	2	0	0	0	0	0	0	0	0	2	2	0	0	4	0	2	2	2	0	4	1	0	50	50	0
132	0	4	0	0	0	0	0	0	0	0	0	0	0	0	0	0	0	0	0	0	0	0	0	0	0	0	0	1	#DIV/0!	#DIV/0!	#DIV/0!	#DIV/0!
133	0	4	0	0	0	0	0	0	0	0	0	0	0	0	0	0	0	0	0	0	0	0	0	0	0	0	0	1	#DIV/0!	#DIV/0!	#DIV/0!	#DIV/0!
134	0	4	0	0	0	1	0	1	0	0	0	0	0	0	0	1	1	0	0	2	0	1	1	1	0	2	2	1	0	50	50	0
135	0	4	0	0	0	1	0	1	0	0	0	0	0	0	0	0	1	1	0	0	2	0	1	1	1	0	2	1	0	50	50	0
136	0	4	0	0	0	0	0	0	0	0	0	0	0	0	0	0	0	0	0	0	0	0	0	0	0	0	0	1	#DIV/0!	#DIV/0!	#DIV/0!	#DIV/0!
137	0	4	0	0	0	0	1	0	1	0	0	0	0	0	0	0	0	0	1	1	0	2	1	1	1	0	2	1	100	50	50	0
138	0	4	0	0	0	1	2	1	2	0	0	0	0	0	0	1	1	2	2	2	4	3	3	3	0	6	6	1	66.6667	50	50	0
139	0	4	0	0	0	0	2	0	2	0	0	0	0	0	0	0	0	0	2	2	0	4	2	2	2	0	4	1	100	50	50	0
140	0	4	0	0	1	0	0	0	1	0	0	0	0	0	0	0	0	2	0	0	2	2	0	1	0	2	2	1	100	0	50	0
141	0	4	0	0	1	0	2	0	3	0	0	0	0	0	0	0	0	0	4	2	0	6	4	2	3	0	6	1	100	33.3333	50	0
142	0	4	0	0	1	0	3	0	4	0	0	0	0	0	0	0	0	5	3	0	8	5	3	4	0	8	8	1	100	37.5	50	0
143	0	4	0	0	0	1	2	3	2	0	0	0	0	0	0	0	3	1	2	2	4	4	5	3	3	0	8	1	50	37.5	37.5	0
144	0	4	0	0	0	0	8	0	9	0	0	0	0	0	0	0	0	9	8	0	17	9	8	8	0	17	17	1	100	47.0588	47.0588	0
145	0	4	0	0	1	1	2	1	2	0	0	0	0	0	0	0	1	1	3	2	2	5	4	3	4	0	7	1	71.4286	42.8571	57.1429	0
146	0	4	0	0	1	0	0	0	0	0	0	0	0	0	0	0	0	1	0	0	1	1	0	1	0	1	1	1	100	0	100	0
147	0	4	0	0	0	0	0	0	1	0	0	0	0	0	0	0	0	0	1	0	0	1	1	0	0	0	1	1	100	0	0	0
148	0	4	0	0	1	0	0	0	0	0	0	0	0	0	0	0	0	1	0	0	1	1	0	1	0	1	1	1	100	0	100	0
149	0	4	0	1	2	0	0	0	1	0	0	0	0	0	0	0	1	0	3	0	1	3	4	0	3	0	4	1	75	0	75	0
150	0	4	0	0	0	0	1	0	3	0	0	0	0	0	0	0	0	3	1	0	4	3	1	1	0	4	4	1	100	25	25	0
151	0	4	0	0	0	0	0	0	0	0	0	0	0	0	0	0	0	0	0	0	0	0	0	0	0	0	0	1	#DIV/0!	#DIV/0!	#DIV/0!	#DIV/0!
152	0	4	0	0	1	0	1	0	3	0	0	0	0	0	0	0	0	4	1	0	5	4	1	2	0	5	5	1	100	20	40	0
153	0	4	0	0	1	1	2	1	2	0	0	0	0	0	0	0	1	1	3	2	2	5	4	3	4	0	7	1	71.4286	42.8571	57.1429	0
154	0	4	0	2	0	0	3	0	6	0	0	0	0	0	0	2	0	6	3	2	9	8	3	5	0	11	11	1	81.8182	27.2727	45.4545	0
155	0	4	0	0	0	0	1	0	1	0	0	0	0	0	0	0	0	0	1	1	0	2	1	1	1	0	2	1	100	50	50	0
156	0	4	0	0	0	0	1	0	1	0	0	0	0	0	0	0	0	1	1	0	2	1	1	1	0	2	2	1	100	50	50	0
157	0	4	0	0	1	1	1	1	1	0	0	0	0	0	0	0	1	1	2	1	2	3	3	2	3	0	5	1	60	40	60	0
158	0	4	0	0	5	0	2	0	2	0	0	0	0	0	0	0	0	7	2	0	9	7	2	7	0	9	9	1	100	22.2222	77.7778	0
159	0	4	0	0	0	0	1	0	1	0	0	0	0	0	0	0	0	0	1	1	0	2	1	1	1	0	2	1	100	50	50	0
160	0	4	0	0	8	2	2	2	3	0	0	0	0	0	0	2	2	11	2	4	13	13	4	12	0	17	17	1	76.4706	23.5294	70.5882	0
161	0	4	0	0	5	0	3	0	6	0	0	0	0	0	0	0	0	0	11	3	0	14	11	3	8	0	14	1	100	21.4286	57.1429	0
162	0	4	0	0	3	0	1	0	8	0	0	0	0	0	0	0	0	11	1	0	12	11	1	4	0	12	12	1	100	8.33333	33.3333	0
163	0	4	0	4	2	0	11	0	14	0	0	0	0	0	0	0	4	0	16	11	4	27	20	11	17	0	31	1	87.0968	35.4839	54.8387	0
164	0	4	0	0	0	0	5	0	6	0	0	0	0	0	0	0	0	6	5	0	11	6	5	5	0	11	11	1	100	45.4545	45.4545	0
165	0	4	0	0	0	0	4	1	11	0	0	0	0	0	0	0	1	0	11	4	1	15	12	4	4	0	16	1	93.75	25	25	0
166	0	4	0	3	18	1	6	0	14	0	0	0	0	0	0	3	1	32	6	4	38	35	7	28	0	42	42	1	90.4762	16.6667	66.6667	0
167	0	4	0	0	1	3	9	2	6	0	4	0	0	0	0	4	2	3	7	13	5	20	9	16	13	0	25	1	80	64	52	0
168	0	4	0	1	6	0	2	0	4	0	0	0	0	0	0	1	0	10	2	1	12	11	2	9	0	13	13	1	92.3077	15.3846	69.2308	0
169	0	4	0	2	2	0	6	0	10	0	0	0	0	0	0	0	2	0	12	6	2	18	14	6	10	0	20	1	90	30	50	0
170	0	4	0	0	0	0	0	0	5	0	0	0	0	0	0	0	0	5	0	0	5	5	0	0	0	5	5	1	100	0	0	0
171	0	4	0	0	6	1	3	1	3	0	0	0	0	0	0	0	1	1	9	3	2	12	10	4	10	0	14	1	85.7143	28.5714	71.4286	0
172	0	4	0	0	0	0	2	0	3	0	0	0	0	0	0	0	0	3	2	0	5	3	2	2	0	5	5	1	100	40	40	0
173	0	4	0	0	3	0	0	0	0	0	0	0	0	0	0	0	0	0	3	0	0	3	3	0	3	0	3	1	100	0	100	0
174	0	4	0	0	2	1	1	1	5	2	0	0	0	0	6	1	5	7	3	6	10	8	8	4	0	16	16	1	62.5	50	25	0
175	0	4	0	0	0	3	4	3	6	0	0	0	0	0	0	0	3	3	6	4	6	10	9	7	7	0	16	1	62.5	43.75	43.75	0
176	0	4	0	0	0	0	3	0	6	0	0	0	0	0	0	0	0	6	3	0	9	6	3	3	0	9	9	1	100	33.3333	33.3333	0
177	0	4	0	1	1	0	8	0	12	0	0	0	0	0	0	0	1	0	13	8	1	21	14	8	10	0	22	1	95.4545	36.3636	45.4545	0
178	0	4	0	0	0	0	9	0	9	0	0	0	0	0	0	0	0	9	9	0	18	9	9	9	0	18	18	1	100	50	50	0
179	0	4	0	0	0	0	0	0	3	0	0	0	0	0	0	0	0	0	3	0	0	3	3	0	0	0	3	1	100	0	0	0
180	0	4	0	0	0	0	6	0	8	0	0	0	0	0	0	0	0	8	6	0	14	8	6	6	0	14	14	1	100	42.8571	42.8571	0
181	0	4	0	0	0	0	8	0	8	0	0	0	0	0	0	0	0	0	8	8	0	16	8	8	8	0	16	1	100	50	50	0
182	0	4	0	0	0	0	2	0	2	0	0	0	0	0	0	0	0	2	2	0	4	2	2	2	0	4	4	1	100	50	50	0
183	0	4	0	0	1	0	0	0	0	0	0	0	0	0	0	0	0	0	1	0	0	1	1	0	1	0	1	1	100	0	100	0
184	0	4	0	0	0	0	2	0	3	0	0	0	0	0	0	0	0	3	2	0	5	3	2	2	0	5	5	1	100	40	40	0
185	0	4	0	0	0	0	1	0	1	0	0	0	0	0	0	0	0	0	1	1	0	2	1	1	1	0	2	1	100	50	50	0
186	0	4	0	0	1	0	1	0	4	0	0	0	0	0	0	0	0	5	1	0	6	5	1	2	0	6	6	1	100	16.6667	33.3333	0
187	0	4	0	0	0	0	2	0	3	0	0	0	0	0	0	0	0	0	3	2	0	5	3	2	2	0	5	1	100	40	40	0
188	0	4	0	0	0	0	4	0	4	0	0	0	0	0	0	0	0	4	4	0	8	4	4	4	0	8	8	1	100	50	50	0
189	0	4	0	0	1	0	2	0	3	0	0	0	0	0	0	0	0	0	4	2	0	6	4	2	3	0	6	1	100	33.3333	50	0
190	0	4	0	0	1	0	2	0	4	0	0	0	0	0	0	0	0	5	2	0	7	5	2	3	0	7	7	1	100	28.5714	42.8571	0
191	0	4	0	0	0	0	3	0	4	0	0	0	0	0	0	0	0	0	4	3	0	7	4	3	3	0	7	1	100	42.8571	42.8571	0
192	0	4	0	0	0	0	5	0	5	0	0	0	0	0	0	0	0	5	5	0	10	5	5	5	0	10	10	1	100	50	50	0
193	0	4	0	0	0	0	3	0	3	0	0	0	0	0	0	0	0	0	3	3	0	6	3	3	3	0	6	1	100	50	50	0
194	0	4	0	0	0	0	2	0	4	0	0	0	0	0	0	0	0	4	2	0	6	4	2	2	0	6	6	1	100	33.3333	33.3333	0
195	0	4	0	0	12	0	19	0	25	0	0	0	0	0	0	0	0	0	37	19	0	56	37	19	31	0	56	1	100	33.9286	55.3571	0
196	0	4	0	0	0	1	3	0	9	1	0	0	0	0	1	0	1	9	4	1	13	9	5	4	0	14	14	1	92.8571	35.7143	28.5714	0
197	0	4	0	0	2	1	16	1	16	0	0	0	0	0	0	0	1	1	18	16	2	34	19	17	19	0	36	1	94.4444	47.2222	52.7778	0
198	0	4	0	0	0	1	1	1	1	0	0	0	0	0	0	1	1	1	1	2	2	2	2	2	0	4	4	1	50	50	50	0
199	0	4	0	0	2	1	9	1	10	0	0	0	0	0	0	0	1	1	12	9	2	21	13	10	12	0	23	1	91.3043	43.4783	52.1739	0
200	0	4	0	0	1	0	2	0	2	0	0	0	0	0	0	0	0	3	2	0	5	3	2	3	0	5	5	1	100	40	60	0
201	0	4	0	0	0	0	4	0	4	0	1	0	0	0	0	1	0	0	4	5	0	9	4	5	4	0	9	1	100	55.5556	44.4444	0
202	0	4	0	0	0	1	3	1	4	0	0	0	0	0	0	1	1	4	3	2	7	5	4	4	0	9	9	1	77.7778	44.4444	44.4444	0
203	0	4	0	0	3	2	5	2	5	0	0	0	0	0	0	0	2	2	8	5	4	13	10	7	10	0	17	1	76.4706	41.1765	58.8235	0
204	0	4	0	0	1	0	6	0	6	0	0	0	0	0	0	0	0	7	6	0	13	7	6	7	0	13	13	1	100	46.1538	53.8462	0
205	0	4	0	0	0	0	4	0	4	0	0	0	0	0	0	0	0	0	4	4	0	8	4	4	4	0	8	1	100	50	50	0
206	0	4	0	0	0	0	3	0	3	0	0	0	0	0	0	0	0	3	3	0	6	3	3	3	0	6	6	1	100	50	50	0
207	0	4	0	0	6	0	6	0	6	0	0	0	0	0	0	0	0	0	12	6	0	18	12	6	12	0	18	1	100	33.3333	66.6667	0
208	0	4	0	0	1	0	13	0	14	0	0	0	0	0	0	0	0	15	13	0	28	15	13	14	0	28	28	1	100	46.4286	50	0
209	0	4	0	0	0	0	6	0	5	0	0	0	0	0	0	0	0	0	5	6	0	11	5	6	6	0	11	1	100	54.5455	54.5455	0
210	0	4	0	0	2	0	2	0	2	0	0	0	0	0	0	0	0	4	2	0	6	4	2	4	0	6	6	1	100	33.3333	66.6667	0
211	0	4	0	0	2	0	7	0	8	0	1	0	0	0	0	1	0	0	10	8	0	18	10	8	9	0	18	1	100	44.4444	50	0
212	0	4	0	0	1	0	21	0	22	0	0	0	0	0	0	0	0	23	21	0	44	23	21	22	0	44	44	1	100	47.7273	50	0
213	0	4	0	2	1	0	8	0	12	0	0	0	0	0	0	0	2	0	13	8	2	21	15	8	11	0	23	1	91.3043	34.7826	47.8261	0
214	0	4	0	0	8	9	3	4	3	0	0	0	0	0	4	4	13	11	3	17	14	15	16	20	0	31	31	1	45.1613	51.6129	64.5161	0
215	0	4	0	1	0	10	12	10	14	4	1	0	0	0	0	5	11	14	14	13	25	27	25	27	23	0	52	1	51.9231	51.9231	44.2308	0
216	0	4	0	0	4	0	35	0	54	0	0	0	0	0	0	0	0	58	35	0	93	58	35	39	0	93	93	1	100	37.6344	41.9355	0
217	0	4	0	0	6	0	59	0	101	0	0	0	0	0	0	0	0	0	107	59	0	166	107	59	65	0	166	1	100	35.5422	39.1566	0
218	0	4	0	0	15	4	18	4	26	0	0	0	0	0	0	4	4	41	18	8	59	45	22	37	0	67	67	1	88.0597	32.8358	55.2239	0
219	0	4	0	0	3	1	1	3	7	0	1	0	0	0	0	1	3	1	10	2	4	12	13	3	5	0	16	1	75	18.75	31.25	0
220	0	4	0	8	13	12	66	5	128	13	0	0	0	0	16	13	15	141	79	28	220	154	94	99	0	248	248	1	88.7097	37.9032	39.9194	0
221	0	4	0	0	1	5	47	1	38	1	4	0	0	0	0	5	1	6	39	51	7	90	40	57	53	0	97	1	92.7835	58.7629	54.6392	0
222	0	4	0	0	3	2	44	1	45	0	0	0	0	0	2	1	4	48	44	5	92	49	48	49	0	97	97	1	94.8454	49.4845	50.5155	0
223	0	4	0	0	3	6	37	3	38	0	4	0	0	0	0	4	3	6	41	41	9	82	44	47	46	0	91	1	90.1099	51.6484	50.5495	0
224	0	4	0	0	0	7	17	7	17	0	0	0	0	0	0	7	7	17	17	14	34	24	24	24	0	48	48	1	70.8333	50	50	0
225	0	4	0	0	0	0	18	0	19	2	1	0	0	0	0	3	0	2	19	19	2	38	19	21	18	0	40	1	95	52.5	45	0
226	0	4	0	0	0	3	34	3	34	0	0	0	0	0	0	3	3	34	34	6	68	37	37	37	0	74	74	1	91.8919	50	50	0
227	0	4	0	0	0	26	47	22	47	8	4	0	0	0	0	12	22	34	47	51	56	98	69	85	73	0	154	1	63.6364	55.1948	47.4026	0
228	0	4	0	0	0	7	36	0	36	4	0	0	0	0	7	0	10	36	40	10	76	36	50	43	0	86	86	1	88.3721	58.1395	50	0
229	0	4	0	0	0	0	21	0	21	0	0	0	0	0	0	0	0	0	21	21	0	42	21	21	21	0	42	1	100	50	50	0
230	0	4	0	0	0	17	35	17	35	0	0	0	0	0	5	17	22	35	35	39	70	52	57	52	0	109	109	1	64.2202	52.2936	47.7064	0
231	0	4	0	0	0	3	19	2	19	0	0	0	0	0	0	0	2	3	19	19	5	38	21	22	22	0	43	1	88.3721	51.1628	51.1628	0
232	0	4	0	0	3	2	9	0	8	0	0	0	0	0	0	0	2	11	9	2	20	11	11	14	0	22	22	1	90.9091	50	63.6364	0
233	0	4	0	0	0	0	19	0	19	0	1	0	0	0	0	1	0	0	19	20	0	39	19	20	19	0	39	1	100	51.2821	48.7179	0
234	0	4	0	0	0	0	8	0	8	0	0	0	0	0	0	0	0	8	8	0	16	8	8	8	0	16	16	1	100	50	50	0
235	0	4	0	0	7	12	32	12	32	0	0	0	0	0	0	0	12	12	39	32	24	71	51	44	51	0	95	1	74.7368	46.3158	53.6842	0
236	0	4	0	0	5	0	26	0	26	0	0	0	0	0	0	0	0	31	26	0	57	31	26	31	0	57	57	1	100	45.614	54.386	0
237	0	4	0	0	0	0	10	0	10	0	0	0	0	0	0	0	0	0	10	10	0	20	10	10	10	0	20	1	100	50	50	0
238	0	4	0	0	0	0	20	0	20	5	0	0	0	0	6	0	1	20	25	1	45	20	26	20	0	46	46	1	97.8261	56.5217	43.4783	0
239	0	4	0	0	0	3	62	2	62	0	0	0	0	0	0	0	2	3	62	62	5	124	64	65	65	0	129	1	96.124	50.3876	50.3876	0
240	0	4	0	0	0	9	29	3	29	8	0	0	0	0	13	3	14	29	37	17	66	32	51	38	0	83	83	1	79.5181	61.4458	45.7831	0
241	0	4	0	0	13	81	701	75	714	13	28	0	0	0	0	41	75	94	727	729	169	1456	802	823	795	0	1625	1	89.6	50.6462	48.9231	0
242	0	4	0	0	0	0	0	0	0	0	0	0	0	0	0	0	0	0	0	0	0	0	0	0	0	0	0	1	#DIV/0!	#DIV/0!	#DIV/0!	#DIV/0!
122	0	5	0	6	10	0	6	0	11	0	0	0	0	0	0	0	6	0	21	6	6	27	27	6	22	0	33	1	81.8182	18.1818	66.6667	0
123	0	5	0	0	11	0	2	0	8	0	0	0	0	0	0	0	0	0	19	2	0	21	19	2	13	0	21	1	100	9.52381	61.9048	0
124	0	5	0	2	24	0	2	2	7	0	0	0	0	0	0	0	4	0	31	2	4	33	35	2	28	0	37	1	89.1892	5.40541	75.6757	0
125	0	5	0	1	8	0	5	0	21	0	0	0	0	0	0	0	1	0	29	5	1	34	30	5	14	0	35	1	97.1429	14.2857	40	0
126	0	5	0	5	6	1	3	3	5	0	1	0	0	0	0	1	8	0	11	4	9	15	19	5	15	0	24	1	62.5	20.8333	62.5	0
127	0	5	0	0	21	0	7	0	23	0	1	0	0	0	0	1	0	0	44	8	0	52	44	8	28	0	52	1	100	15.3846	53.8462	0
128	0	5	0	0	17	0	3	1	9	0	0	0	0	0	0	0	1	0	26	3	1	29	27	3	20	0	30	1	96.6667	10	66.6667	0
129	0	5	0	3	3	0	5	0	17	0	1	0	0	0	0	1	3	0	20	6	3	26	23	6	11	0	29	1	89.6552	20.6897	37.931	0
130	0	5	0	0	8	0	3	0	10	0	0	0	0	0	0	0	0	0	18	3	0	21	18	3	11	0	21	1	100	14.2857	52.381	0
131	0	5	0	4	6	0	5	0	13	0	0	0	0	0	0	0	4	0	19	5	4	24	23	5	15	0	28	1	85.7143	17.8571	53.5714	0
132	0	5	0	2	15	0	2	0	9	0	0	0	0	0	0	0	2	0	24	2	2	26	26	2	19	0	28	1	92.8571	7.14286	67.8571	0
133	0	5	0	3	14	0	3	0	6	0	0	0	0	0	0	0	3	0	20	3	3	23	23	3	20	0	26	1	88.4615	11.5385	76.9231	0
134	0	5	0	0	4	0	0	0	3	0	0	0	0	0	0	0	0	0	7	0	0	7	7	0	4	0	7	1	100	0	57.1429	0
135	0	5	0	0	8	0	4	0	10	0	0	0	0	0	0	0	0	0	18	4	0	22	18	4	12	0	22	1	100	18.1818	54.5455	0
136	0	5	0	0	0	1	7	3	12	0	0	0	0	0	0	0	3	0	12	7	4	19	15	8	8	0	23	1	82.6087	34.7826	34.7826	0
137	0	5	0	0	1	1	3	1	6	0	0	0	0	0	0	0	1	1	7	3	2	10	8	4	5	0	12	1	83.3333	33.3333	41.6667	0
138	0	5	0	0	20	0	3	0	13	0	0	0	0	0	0	0	0	0	33	3	0	36	33	3	23	0	36	1	100	8.33333	63.8889	0
139	0	5	0	0	2	0	2	0	7	0	0	0	0	0	0	0	0	0	9	2	0	11	9	2	4	0	11	1	100	18.1818	36.3636	0
140	0	5	0	1	3	1	1	1	1	0	0	0	0	0	0	0	2	0	4	1	3	5	6	2	6	0	8	1	62.5	25	75	0
141	0	5	0	0	2	0	1	0	3	0	0	0	0	0	0	0	0	0	5	1	0	6	5	1	3	0	6	1	100	16.6667	50	0
142	0	5	0	0	4	0	1	0	10	0	0	0	0	0	0	0	0	0	14	1	0	15	14	1	5	0	15	1	100	6.66667	33.3333	0
143	0	5	0	0	8	0	0	0	3	0	0	0	0	0	0	0	0	0	11	0	0	11	11	0	8	0	11	1	100	0	72.7273	0
144	0	5	0	0	5	0	0	0	4	0	0	0	0	0	0	0	0	0	9	0	0	9	9	0	5	0	9	1	100	0	55.5556	0
145	0	5	0	0	5	0	4	0	5	0	0	0	0	0	0	0	0	0	10	4	0	14	10	4	9	0	14	1	100	28.5714	64.2857	0
146	0	5	0	2	3	1	5	1	7	0	0	0	0	0	0	0	3	0	10	5	4	15	13	6	11	0	19	1	78.9474	31.5789	57.8947	0
147	0	5	0	0	26	0	1	0	23	0	1	0	0	0	0	1	0	0	49	2	0	51	49	2	27	0	51	1	100	3.92157	52.9412	0
148	0	5	0	0	4	0	4	0	5	0	1	0	0	0	0	1	0	0	9	5	0	14	9	5	8	0	14	1	100	35.7143	57.1429	0
149	0	5	0	1	8	0	2	0	14	0	0	0	0	0	0	0	1	0	22	2	1	24	23	2	11	0	25	1	96	8	44	0
150	0	5	0	0	3	0	1	0	2	0	0	0	0	0	0	0	0	0	5	1	0	6	5	1	4	0	6	1	100	16.6667	66.6667	0
151	0	5	0	0	1	0	1	0	3	0	0	0	0	0	0	0	0	0	4	1	0	5	4	1	2	0	5	1	100	20	40	0
152	0	5	0	0	2	0	0	0	2	0	0	0	0	0	0	0	0	0	4	0	0	4	4	0	2	0	4	1	100	0	50	0
153	0	5	0	0	4	0	0	0	3	0	0	0	0	0	0	0	0	0	7	0	0	7	7	0	4	0	7	1	100	0	57.1429	0
154	0	5	0	0	1	1	0	6	4	1	0	0	0	0	0	1	6	0	5	0	8	5	11	2	2	0	13	1	38.4615	15.3846	15.3846	0
155	0	5	0	2	4	0	0	0	2	0	0	0	0	0	0	0	2	0	6	0	2	6	8	0	6	0	8	1	75	0	75	0
156	0	5	0	0	0	0	0	0	0	0	0	0	0	0	0	0	0	0	0	0	0	0	0	0	0	0	0	1	#DIV/0!	#DIV/0!	#DIV/0!	#DIV/0!
157	0	5	0	0	1	0	0	0	1	0	0	0	0	0	0	0	0	0	2	0	0	2	2	0	1	0	2	1	100	0	50	0
158	0	5	0	1	2	0	1	0	10	0	0	0	0	0	0	0	1	0	12	1	1	13	13	1	4	0	14	1	92.8571	7.14286	28.5714	0
159	0	5	0	1	3	0	1	0	6	0	0	0	0	0	0	0	1	0	9	1	1	10	10	1	5	0	11	1	90.9091	9.09091	45.4545	0
160	0	5	0	0	4	0	1	0	8	0	0	0	0	0	0	0	0	0	12	1	0	13	12	1	5	0	13	1	100	7.69231	38.4615	0
161	0	5	0	0	0	0	0	0	0	0	0	0	0	0	0	0	0	0	0	0	0	0	0	0	0	0	0	1	#DIV/0!	#DIV/0!	#DIV/0!	#DIV/0!
162	0	5	0	1	0	0	0	1	1	0	0	0	0	0	0	0	2	0	1	0	2	1	3	0	1	0	3	1	33.3333	0	33.3333	0
163	0	5	0	9	8	0	1	0	7	0	0	0	0	0	0	0	9	0	15	1	9	16	24	1	18	0	25	1	64	4	72	0
164	0	5	0	1	10	0	0	0	6	0	0	0	0	0	0	0	1	0	16	0	1	16	17	0	11	0	17	1	94.1176	0	64.7059	0
165	0	5	0	0	2	0	0	0	5	0	0	0	0	0	0	0	0	0	7	0	0	7	7	0	2	0	7	1	100	0	28.5714	0
166	0	5	0	1	8	0	0	2	3	0	0	0	0	0	0	0	3	0	11	0	3	11	14	0	9	0	14	1	78.5714	0	64.2857	0
167	0	5	0	1	5	0	1	0	3	0	0	0	0	0	0	0	1	0	8	1	1	9	9	1	7	0	10	1	90	10	70	0
168	0	5	0	0	4	0	0	0	6	0	0	0	0	0	0	0	0	0	10	0	0	10	10	0	4	0	10	1	100	0	40	0
169	0	5	0	0	0	0	0	0	2	0	0	0	0	0	0	0	0	0	2	0	0	2	2	0	0	0	2	1	100	0	0	0
170	0	5	0	0	5	0	0	2	5	0	0	0	0	0	0	0	2	0	10	0	2	10	12	0	5	0	12	1	83.3333	0	41.6667	0
171	0	5	0	3	4	0	0	0	2	0	0	0	0	0	0	0	3	0	6	0	3	6	9	0	7	0	9	1	66.6667	0	77.7778	0
172	0	5	0	0	5	0	0	1	6	0	0	0	0	0	0	0	1	0	11	0	1	11	12	0	5	0	12	1	91.6667	0	41.6667	0
173	0	5	0	0	5	0	1	0	3	0	0	0	0	0	0	0	0	0	8	1	0	9	8	1	6	0	9	1	100	11.1111	66.6667	0
174	0	5	0	0	0	0	0	0	1	0	0	0	0	0	0	0	0	0	1	0	0	1	1	0	0	0	1	1	100	0	0	0
175	0	5	0	0	1	0	0	0	1	0	0	0	0	0	0	0	0	0	2	0	0	2	2	0	1	0	2	1	100	0	50	0
176	0	5	0	0	0	0	0	0	0	0	0	0	0	0	0	0	0	0	0	0	0	0	0	0	0	0	0	1	#DIV/0!	#DIV/0!	#DIV/0!	#DIV/0!
177	0	5	0	1	2	0	1	1	2	0	0	0	0	0	0	0	2	0	4	1	2	5	6	1	4	0	7	1	71.4286	14.2857	57.1429	0
178	0	5	0	0	1	0	0	0	0	0	0	0	0	0	0	0	0	0	1	0	0	1	1	0	1	0	1	1	100	0	100	0
179	0	5	0	0	4	0	0	0	6	0	0	0	0	0	0	0	0	0	10	0	0	10	10	0	4	0	10	1	100	0	40	0
180	0	5	0	0	2	0	0	0	2	0	0	0	0	0	0	0	0	0	4	0	0	4	4	0	2	0	4	1	100	0	50	0
181	0	5	0	0	0	0	0	0	3	0	0	0	0	0	0	0	0	0	3	0	0	3	3	0	0	0	3	1	100	0	0	0
182	0	5	0	0	0	0	0	1	0	0	0	0	0	0	0	0	1	0	0	0	1	0	1	0	0	0	1	1	0	0	0	0
183	0	5	0	0	0	0	0	0	1	0	0	0	0	0	0	0	0	0	1	0	0	1	1	0	0	0	1	1	100	0	0	0
184	0	5	0	0	1	0	0	0	1	0	0	0	0	0	0	0	0	0	2	0	0	2	2	0	1	0	2	1	100	0	50	0
185	0	5	0	1	1	0	1	3	1	0	0	0	0	0	0	0	4	0	2	1	4	3	6	1	3	0	7	1	42.8571	14.2857	42.8571	0
186	0	5	0	0	1	0	0	0	0	0	0	0	0	0	0	0	0	0	1	0	0	1	1	0	1	0	1	1	100	0	100	0
187	0	5	0	1	3	0	0	0	0	0	0	0	0	0	0	0	1	0	3	0	1	3	4	0	4	0	4	1	75	0	100	0
188	0	5	0	0	2	0	0	0	0	0	0	0	0	0	0	0	0	0	2	0	0	2	2	0	2	0	2	1	100	0	100	0
189	0	5	0	0	0	0	0	0	0	0	0	0	0	0	0	0	0	0	0	0	0	0	0	0	0	0	0	1	#DIV/0!	#DIV/0!	#DIV/0!	#DIV/0!
190	0	5	0	0	1	0	0	0	0	0	0	0	0	0	0	0	0	0	1	0	0	1	1	0	1	0	1	1	100	0	100	0
191	0	5	0	0	2	0	1	0	2	0	0	0	0	0	0	0	0	0	4	1	0	5	4	1	3	0	5	1	100	20	60	0
192	0	5	0	0	0	0	0	0	1	0	0	0	0	0	0	0	0	0	1	0	0	1	1	0	0	0	1	1	100	0	0	0
193	0	5	0	0	1	0	0	0	4	0	0	0	0	0	0	0	0	0	5	0	0	5	5	0	1	0	5	1	100	0	20	0
194	0	5	0	0	0	0	0	0	0	0	0	0	0	0	0	0	0	0	0	0	0	0	0	0	0	0	0	1	#DIV/0!	#DIV/0!	#DIV/0!	#DIV/0!
195	0	5	0	0	2	0	1	0	3	0	0	0	0	0	0	0	0	0	5	1	0	6	5	1	3	0	6	1	100	16.6667	50	0
196	0	5	0	0	0	0	0	0	0	0	0	0	0	0	0	0	0	0	0	0	0	0	0	0	0	0	0	1	#DIV/0!	#DIV/0!	#DIV/0!	#DIV/0!
197	0	5	0	0	0	0	0	0	0	0	0	0	0	0	0	0	0	0	0	0	0	0	0	0	0	0	0	1	#DIV/0!	#DIV/0!	#DIV/0!	#DIV/0!
198	0	5	0	0	3	0	1	1	1	0	0	0	0	0	0	0	1	0	4	1	1	5	5	1	4	0	6	1	83.3333	16.6667	66.6667	0
199	0	5	0	0	2	0	0	0	0	0	0	0	0	0	0	0	0	0	2	0	0	2	2	0	2	0	2	1	100	0	100	0
200	0	5	0	0	0	0	0	0	1	0	0	0	0	0	0	0	0	0	1	0	0	1	1	0	0	0	1	1	100	0	0	0
201	0	5	0	0	1	0	0	0	0	0	0	0	0	0	0	0	0	0	1	0	0	1	1	0	1	0	1	1	100	0	100	0
202	0	5	0	0	1	0	0	0	1	0	0	0	0	0	0	0	0	0	2	0	0	2	2	0	1	0	2	1	100	0	50	0
203	0	5	0	0	0	0	1	0	1	0	0	0	0	0	0	0	0	0	1	1	0	2	1	1	1	0	2	1	100	50	50	0
204	0	5	0	0	3	0	0	0	2	0	0	0	0	0	0	0	0	0	5	0	0	5	5	0	3	0	5	1	100	0	60	0
205	0	5	0	0	0	0	0	0	0	0	0	0	0	0	0	0	0	0	0	0	0	0	0	0	0	0	0	1	#DIV/0!	#DIV/0!	#DIV/0!	#DIV/0!
206	0	5	0	0	1	0	0	0	0	0	0	0	0	0	0	0	0	0	1	0	0	1	1	0	1	0	1	1	100	0	100	0
207	0	5	0	0	1	0	0	0	3	0	0	0	0	0	0	0	0	0	4	0	0	4	4	0	1	0	4	1	100	0	25	0
208	0	5	0	0	1	0	0	0	0	0	0	0	0	0	0	0	0	0	1	0	0	1	1	0	1	0	1	1	100	0	100	0
209	0	5	0	1	2	0	0	0	0	0	0	0	0	0	0	0	1	0	2	0	1	2	3	0	3	0	3	1	66.6667	0	100	0
210	0	5	0	1	0	0	0	0	2	0	0	0	0	0	0	0	1	0	2	0	1	2	3	0	1	0	3	1	66.6667	0	33.3333	0
211	0	5	0	0	0	0	0	0	0	0	0	0	0	0	0	0	0	0	0	0	0	0	0	0	0	0	0	1	#DIV/0!	#DIV/0!	#DIV/0!	#DIV/0!
212	0	5	0	0	0	0	0	0	0	0	0	0	0	0	0	0	0	1	0	0	0	0	0	0	0	0	0	1	#DIV/0!	#DIV/0!	#DIV/0!	#DIV/0!
213	0	5	0	0	0	0	0	0	0	0	0	0	0	0	0	0	0	0	0	0	0	0	0	0	0	0	0	1	#DIV/0!	#DIV/0!	#DIV/0!	#DIV/0!
214	0	5	0	1	0	0	0	0	0	0	0	0	0	0	0	0	1	0	0	0	1	0	1	0	1	0	1	1	0	0	100	0
215	0	5	0	0	1	0	0	0	0	0	0	0	0	0	0	0	0	0	1	0	0	1	1	0	1	0	1	1	100	0	100	0
216	0	5	0	0	0	0	0	0	0	0	0	0	0	0	0	0	0	0	0	0	0	0	0	0	0	0	0	1	#DIV/0!	#DIV/0!	#DIV/0!	#DIV/0!
217	0	5	0	0	0	0	0	0	1	0	0	0	0	0	0	0	0	0	1	0	0	1	1	0	0	0	1	1	100	0	0	0
218	0	5	0	0	0	0	0	0	0	0	0	0	0	0	0	0	0	0	0	0	0	0	0	0	0	0	0	1	#DIV/0!	#DIV/0!	#DIV/0!	#DIV/0!
219	0	5	0	0	0	0	0	0	0	0	0	0	0	0	0	0	0	0	0	0	0	0	0	0	0	0	0	1	#DIV/0!	#DIV/0!	#DIV/0!	#DIV/0!
220	0	5	0	0	1	0	0	0	0	0	0	0	0	0	0	0	0	0	1	0	0	1	1	0	1	0	1	1	100	0	100	0
221	0	5	0	0	0	0	0	0	0	0	0	0	0	0	0	0	0	0	0	0	0	0	0	0	0	0	0	1	#DIV/0!	#DIV/0!	#DIV/0!	#DIV/0!
222	0	5	0	0	0	0	0	0	0	0	0	0	0	0	0	0	0	0	0	0	0	0	0	0	0	0	0	1	#DIV/0!	#DIV/0!	#DIV/0!	#DIV/0!
223	0	5	0	0	0	0	0	0	0	0	0	0	0	0	0	0	0	0	0	0	0	0	0	0	0	0	0	1	#DIV/0!	#DIV/0!	#DIV/0!	#DIV/0!
224	0	5	0	0	0	0	1	0	1	0	0	0	0	0	0	0	0	0	1	1	0	2	1	1	1	0	2	1	100	50	50	0
225	0	5	0	0	0	0	0	0	0	0	0	0	0	0	0	0	0	0	0	0	0	0	0	0	0	0	0	1	#DIV/0!	#DIV/0!	#DIV/0!	#DIV/0!
226	0	5	0	0	0	0	2	0	6	0	0	0	0	0	0	0	0	0	6	2	0	8	6	2	2	0	8	1	100	25	25	0
227	0	5	0	0	1	0	0	0	0	0	0	0	0	0	0	0	0	0	1	0	0	1	1	0	1	0	1	1	100	0	100	0
228	0	5	0	0	1	0	0	0	0	0	0	0	0	0	0	0	0	0	1	0	0	1	1	0	1	0	1	1	100	0	100	0
229	0	5	0	0	0	0	0	0	0	0	0	0	0	0	0	0	0	0	0	0	0	0	0	0	0	0	0	1	#DIV/0!	#DIV/0!	#DIV/0!	#DIV/0!
230	0	5	0	0	0	0	0	0	1	0	0	0	0	0	0	0	0	0	1	0	0	1	1	0	0	0	1	1	100	0	0	0
231	0	5	0	0	0	0	0	0	0	0	0	0	0	0	0	0	0	0	0	0	0	0	0	0	0	0	0	1	#DIV/0!	#DIV/0!	#DIV/0!	#DIV/0!
232	0	5	0	1	1	0	0	0	1	0	0	0	0	0	0	0	1	0	2	0	1	2	3	0	2	0	3	1	66.6667	0	66.6667	0
233	0	5	0	0	2	0	0	0	0	0	0	0	0	0	0	0	0	0	2	0	0	2	2	0	2	0	2	1	100	0	100	0
234	0	5	0	0	7	0	0	0	0	0	0	0	0	0	0	0	0	0	7	0	0	7	7	0	7	0	7	1	100	0	100	0
235	0	5	0	0	0	0	0	0	1	0	0	0	0	0	0	0	0	0	1	0	0	1	1	0	0	0	1	1	100	0	0	0
236	0	5	0	0	0	0	0	0	2	0	0	0	0	0	0	0	0	0	2	0	0	2	2	0	0	0	2	1	100	0	0	0
237	0	5	0	0	2	0	0	0	5	0	0	0	0	0	0	0	0	0	7	0	0	7	7	0	2	0	7	1	100	0	28.5714	0
238	0	5	0	0	1	0	0	0	0	0	0	0	0	0	0	0	0	0	1	0	0	1	1	0	1	0	1	1	100	0	100	0
239	0	5	0	0	0	0	0	0	2	0	0	0	0	0	0	0	0	0	2	0	0	2	2	0	0	0	2	1	100	0	0	0
240	0	5	0	0	1	0	0	0	1	0	0	0	0	0	0	0	0	0	2	0	0	2	2	0	1	0	2	1	100	0	50	0
241	0	5	0	8	60	0	7	1	78	1	0	0	0	0	0	1	9	1	138	7	10	145	147	8	75	0	155	1	93.5484	5.16129	48.3871	0
242	0	5	0	1	42	0	7	1	43	0	0	0	0	0	0	0	2	0	85	7	2	92	87	7	50	0	94	1	97.8723	7.44681	53.1915	0
122	0	6	0	0	3	2	20	2	28	0	3	0	0	0	0	3	2	2	31	23	4	54	33	25	25	0	58	1	93.1034	43.1034	43.1034	0
123	0	6	0	0	1	0	2	0	2	0	1	0	0	0	0	1	0	0	3	3	0	6	3	3	3	0	6	1	100	50	50	0
124	0	6	0	0	10	4	6	1	6	0	2	0	0	0	0	2	1	4	16	8	5	24	17	12	20	0	29	1	82.7586	41.3793	68.9655	0
125	0	6	0	0	3	0	9	0	9	0	1	0	0	0	0	1	0	0	12	10	0	22	12	10	12	0	22	1	100	45.4545	54.5455	0
126	0	6	0	1	0	18	13	18	13	0	1	0	0	0	0	1	19	18	13	14	37	27	32	32	32	0	64	1	42.1875	50	50	0
127	0	6	0	0	0	1	16	0	13	1	1	0	0	0	0	2	0	2	13	17	2	30	13	19	17	0	32	1	93.75	59.375	53.125	0
128	0	6	0	0	12	1	35	1	32	0	5	0	0	0	0	5	1	1	44	40	2	84	45	41	48	0	86	1	97.6744	47.6744	55.814	0
129	0	6	0	7	2	7	7	7	6	2	0	0	0	0	0	2	14	9	8	7	23	15	22	16	23	0	38	1	39.4737	42.1053	60.5263	0
130	0	6	0	0	5	0	8	0	6	0	0	0	0	0	0	0	0	0	11	8	0	19	11	8	13	0	19	1	100	42.1053	68.4211	0
131	0	6	0	0	0	1	5	1	5	0	0	0	0	0	0	0	1	1	5	5	2	10	6	6	6	0	12	1	83.3333	50	50	0
132	0	6	0	0	1	0	2	0	3	0	0	0	0	0	0	0	0	0	4	2	0	6	4	2	3	0	6	1	100	33.3333	50	0
133	0	6	0	7	4	4	7	3	7	3	0	0	0	0	0	3	10	7	11	7	17	18	21	14	22	0	35	1	51.4286	40	62.8571	0
134	0	6	0	1	1	0	7	0	7	1	0	0	0	0	0	1	1	1	8	7	2	15	9	8	9	0	17	1	88.2353	47.0588	52.9412	0
135	0	6	0	0	2	0	7	0	5	0	3	0	0	0	0	3	0	0	7	10	0	17	7	10	9	0	17	1	100	58.8235	52.9412	0
136	0	6	0	0	0	0	13	0	13	0	1	0	0	0	0	1	0	0	13	14	0	27	13	14	13	0	27	1	100	51.8519	48.1481	0
137	0	6	0	0	0	3	9	3	10	0	0	0	0	0	0	0	3	3	10	9	6	19	13	12	12	0	25	1	76	48	48	0
138	0	6	0	0	0	0	8	0	8	0	0	0	0	0	0	0	0	0	8	8	0	16	8	8	8	0	16	1	100	50	50	0
139	0	6	0	0	2	0	1	0	0	0	0	0	0	0	0	0	0	0	2	1	0	3	2	1	3	0	3	1	100	33.3333	100	0
140	0	6	0	0	0	0	5	0	6	0	0	0	0	0	0	0	0	0	6	5	0	11	6	5	5	0	11	1	100	45.4545	45.4545	0
141	0	6	0	0	0	5	0	5	0	0	0	0	0	0	0	0	5	5	0	0	10	0	5	5	5	0	10	1	0	50	50	0
142	0	6	0	0	0	1	7	1	7	0	0	0	0	0	0	0	1	1	7	7	2	14	8	8	8	0	16	1	87.5	50	50	0
143	0	6	0	0	2	0	2	0	2	0	0	0	0	0	0	0	0	0	4	2	0	6	4	2	4	0	6	1	100	33.3333	66.6667	0
144	0	6	0	0	0	0	2	0	2	0	0	0	0	0	0	0	0	0	2	2	0	4	2	2	2	0	4	1	100	50	50	0
145	0	6	0	0	0	0	6	0	5	0	0	0	0	0	0	0	0	0	5	6	0	11	5	6	6	0	11	1	100	54.5455	54.5455	0
146	0	6	0	0	0	0	2	0	2	0	0	0	0	0	0	0	0	0	2	2	0	4	2	2	2	0	4	1	100	50	50	0
147	0	6	0	0	0	1	11	0	11	0	0	0	0	0	0	0	0	1	11	11	1	22	11	12	12	0	23	1	95.6522	52.1739	52.1739	0
148	0	6	0	0	1	0	14	0	14	0	0	0	0	0	0	0	0	0	15	14	0	29	15	14	15	0	29	1	100	48.2759	51.7241	0
149	0	6	0	0	3	0	2	0	2	1	0	0	0	0	0	1	0	1	5	2	1	7	5	3	5	0	8	1	87.5	37.5	62.5	0
150	0	6	0	0	0	2	7	2	6	0	0	0	0	0	0	0	2	2	6	7	4	13	8	9	9	0	17	1	76.4706	52.9412	52.9412	0
151	0	6	0	0	1	0	1	0	0	0	0	0	0	0	0	0	0	0	1	1	0	2	1	1	2	0	2	1	100	50	100	0
152	0	6	0	0	1	0	2	0	2	0	0	0	0	0	0	0	0	0	3	2	0	5	3	2	3	0	5	1	100	40	60	0
153	0	6	0	3	7	4	3	4	4	1	0	0	0	0	0	1	7	5	11	3	12	14	18	8	17	0	26	1	53.8462	30.7692	65.3846	0
154	0	6	0	0	2	0	5	0	5	0	0	0	0	0	0	0	0	0	7	5	0	12	7	5	7	0	12	1	100	41.6667	58.3333	0
155	0	6	0	0	4	0	5	0	5	0	0	0	0	0	0	0	0	0	9	5	0	14	9	5	9	0	14	1	100	35.7143	64.2857	0
156	0	6	0	0	1	0	0	0	0	0	1	0	0	0	0	1	0	0	1	1	0	2	1	1	1	0	2	1	100	50	50	0
157	0	6	0	0	1	0	0	0	1	0	0	0	0	0	0	0	0	0	2	0	0	2	2	0	1	0	2	1	100	0	50	0
158	0	6	0	0	0	0	0	0	3	0	0	0	0	0	0	0	0	0	3	0	0	3	3	0	0	0	3	1	100	0	0	0
159	0	6	0	0	3	4	6	0	6	0	1	0	0	0	0	1	0	4	9	7	4	16	9	11	13	0	20	1	80	55	65	0
160	0	6	0	0	0	0	5	0	5	2	0	0	0	0	0	2	0	2	5	5	2	10	5	7	5	0	12	1	83.3333	58.3333	41.6667	0
161	0	6	0	0	0	0	2	0	2	0	0	0	0	0	0	0	0	0	2	2	0	4	2	2	2	0	4	1	100	50	50	0
162	0	6	0	0	0	0	1	0	0	0	0	0	0	0	0	0	0	0	0	1	0	1	0	1	1	0	1	1	100	100	100	0
163	0	6	0	2	1	1	1	4	9	1	0	0	0	0	0	1	6	2	10	1	8	11	16	3	5	0	19	1	57.8947	15.7895	26.3158	0
164	0	6	0	1	0	0	3	0	4	0	0	0	0	0	0	0	1	0	4	3	1	7	5	3	4	0	8	1	87.5	37.5	50	0
165	0	6	0	0	1	0	1	0	1	0	1	0	0	0	0	1	0	0	2	2	0	4	2	2	2	0	4	1	100	50	50	0
166	0	6	0	0	0	1	1	1	1	0	1	0	0	0	0	1	1	1	1	2	2	3	2	3	2	0	5	1	60	60	40	0
167	0	6	0	0	0	0	5	0	5	0	1	0	0	0	0	1	0	0	5	6	0	11	5	6	5	0	11	1	100	54.5455	45.4545	0
168	0	6	0	0	0	0	5	0	8	0	0	0	0	0	0	0	0	0	8	5	0	13	8	5	5	0	13	1	100	38.4615	38.4615	0
169	0	6	0	0	0	0	0	0	1	0	0	0	0	0	0	0	0	0	1	0	0	1	1	0	0	0	1	1	100	0	0	0
170	0	6	0	0	1	0	12	0	12	0	0	0	0	0	0	0	0	0	13	12	0	25	13	12	13	0	25	1	100	48	52	0
171	0	6	0	0	1	0	2	0	2	0	0	0	0	0	0	0	0	0	3	2	0	5	3	2	3	0	5	1	100	40	60	0
172	0	6	0	0	1	0	3	0	2	0	2	0	0	0	0	2	0	0	3	5	0	8	3	5	4	0	8	1	100	62.5	50	0
173	0	6	0	0	0	0	1	0	1	0	0	0	0	0	0	0	0	0	1	1	0	2	1	1	1	0	2	1	100	50	50	0
174	0	6	0	0	0	0	0	0	0	0	0	0	0	0	0	0	0	0	0	0	0	0	0	0	0	0	0	1	#DIV/0!	#DIV/0!	#DIV/0!	#DIV/0!
175	0	6	0	0	1	0	0	0	0	0	0	0	0	0	0	0	0	0	1	0	0	1	1	0	1	0	1	1	100	0	100	0
176	0	6	0	0	0	0	1	0	1	0	0	0	0	0	0	0	0	0	1	1	0	2	1	1	1	0	2	1	100	50	50	0
177	0	6	0	0	2	0	1	0	1	0	0	0	0	0	0	0	0	0	3	1	0	4	3	1	3	0	4	1	100	25	75	0
178	0	6	0	1	1	0	1	0	1	0	0	0	0	0	0	0	1	0	2	1	1	3	3	1	3	0	4	1	75	25	75	0
179	0	6	0	0	3	0	0	0	1	0	0	0	0	0	0	0	0	0	4	0	0	4	4	0	3	0	4	1	100	0	75	0
180	0	6	0	0	0	0	1	0	1	0	1	0	0	0	0	1	0	0	1	2	0	3	1	2	1	0	3	1	100	66.6667	33.3333	0
181	0	6	0	0	0	0	4	0	4	0	1	0	0	0	0	1	0	0	4	5	0	9	4	5	4	0	9	1	100	55.5556	44.4444	0
182	0	6	0	0	0	0	0	0	0	0	0	0	0	0	0	0	0	0	0	0	0	0	0	0	0	0	0	1	#DIV/0!	#DIV/0!	#DIV/0!	#DIV/0!
183	0	6	0	0	3	0	8	0	6	0	0	0	0	0	0	0	0	0	9	8	0	17	9	8	11	0	17	1	100	47.0588	64.7059	0
184	0	6	0	0	0	0	1	0	2	0	0	0	0	0	0	0	0	0	2	1	0	3	2	1	1	0	3	1	100	33.3333	33.3333	0
185	0	6	0	0	1	0	0	0	1	0	0	0	0	0	0	0	0	0	2	0	0	2	2	0	1	0	2	1	100	0	50	0
186	0	6	0	0	1	0	0	0	0	0	0	0	0	0	0	0	0	0	1	0	0	1	1	0	1	0	1	1	100	0	100	0
187	0	6	0	0	0	0	0	0	0	0	0	0	0	0	0	0	0	0	0	0	0	0	0	0	0	0	0	1	#DIV/0!	#DIV/0!	#DIV/0!	#DIV/0!
188	0	6	0	0	1	0	1	0	1	0	0	0	0	0	0	0	0	0	2	1	0	3	2	1	2	0	3	1	100	33.3333	66.6667	0
189	0	6	0	0	0	0	0	0	0	0	0	0	0	0	0	0	0	0	0	0	0	0	0	0	0	0	0	1	#DIV/0!	#DIV/0!	#DIV/0!	#DIV/0!
190	0	6	0	0	0	0	0	0	0	0	0	0	0	0	0	0	0	0	0	0	0	0	0	0	0	0	0	1	#DIV/0!	#DIV/0!	#DIV/0!	#DIV/0!
191	0	6	0	0	0	0	0	0	0	0	0	0	0	0	0	0	0	0	0	0	0	0	0	0	0	0	0	1	#DIV/0!	#DIV/0!	#DIV/0!	#DIV/0!
192	0	6	0	0	0	0	1	0	1	0	0	0	0	0	0	0	0	0	1	1	0	2	1	1	1	0	2	1	100	50	50	0
193	0	6	0	0	0	0	2	0	0	0	0	0	0	0	0	0	0	0	0	2	0	2	0	2	2	0	2	1	100	100	100	0
194	0	6	0	0	0	0	0	0	1	0	0	0	0	0	0	0	0	0	1	0	0	1	1	0	0	0	1	1	100	0	0	0
195	0	6	0	0	0	0	0	1	0	0	0	0	0	0	0	0	1	0	0	0	1	0	1	0	0	0	1	1	0	0	0	0
196	0	6	0	0	0	0	0	0	0	0	0	0	0	0	0	0	0	0	0	0	0	0	0	0	0	0	0	1	#DIV/0!	#DIV/0!	#DIV/0!	#DIV/0!
197	0	6	0	0	0	0	1	0	2	0	0	0	0	0	0	0	0	0	2	1	0	3	2	1	1	0	3	1	100	33.3333	33.3333	0
198	0	6	0	0	2	0	0	0	0	0	0	0	0	0	0	0	0	0	2	0	0	2	2	0	2	0	2	1	100	0	100	0
199	0	6	0	0	0	0	0	0	0	0	0	0	0	0	0	0	0	0	0	0	0	0	0	0	0	0	0	1	#DIV/0!	#DIV/0!	#DIV/0!	#DIV/0!
200	0	6	0	0	0	0	0	0	0	0	0	0	0	0	0	0	0	0	0	0	0	0	0	0	0	0	0	1	#DIV/0!	#DIV/0!	#DIV/0!	#DIV/0!
201	0	6	0	0	0	0	0	0	0	0	0	0	0	0	0	0	0	0	0	0	0	0	0	0	0	0	0	1	#DIV/0!	#DIV/0!	#DIV/0!	#DIV/0!
202	0	6	0	0	1	0	1	0	1	0	0	0	0	0	0	0	0	0	2	1	0	3	2	1	2	0	3	1	100	33.3333	66.6667	0
203	0	6	0	0	2	0	0	0	1	0	0	0	0	0	0	0	0	0	3	0	0	3	3	0	2	0	3	1	100	0	66.6667	0
204	0	6	0	0	0	0	0	0	0	0	1	0	0	0	0	1	0	0	0	1	0	1	0	1	0	0	1	1	100	100	0	0
205	0	6	0	0	2	0	0	0	2	0	0	0	0	0	0	0	0	0	4	0	0	4	4	0	2	0	4	1	100	0	50	0
206	0	6	0	0	0	0	0	0	0	0	0	0	0	0	0	0	0	0	0	0	0	0	0	0	0	0	0	1	#DIV/0!	#DIV/0!	#DIV/0!	#DIV/0!
207	0	6	0	0	0	0	1	0	3	0	0	0	0	0	0	0	0	0	3	1	0	4	3	1	1	0	4	1	100	25	25	0
208	0	6	0	0	1	0	1	0	0	0	0	0	0	0	0	0	0	0	1	1	0	2	1	1	2	0	2	1	100	50	100	0
209	0	6	0	0	1	0	0	0	0	0	0	0	0	0	0	0	0	0	1	0	0	1	1	0	1	0	1	1	100	0	100	0
210	0	6	0	0	2	1	1	1	5	0	0	0	0	0	0	0	1	1	7	1	2	8	8	2	4	0	10	1	80	20	40	0
211	0	6	0	0	1	0	1	0	1	0	0	0	0	0	0	0	0	0	2	1	0	3	2	1	2	0	3	1	100	33.3333	66.6667	0
212	0	6	0	0	0	0	0	0	0	0	0	0	0	0	0	0	0	0	0	0	0	0	0	0	0	0	0	1	#DIV/0!	#DIV/0!	#DIV/0!	#DIV/0!
213	0	6	0	0	1	0	0	0	1	0	0	0	0	0	0	0	0	0	2	0	0	2	2	0	1	0	2	1	100	0	50	0
214	0	6	0	0	0	0	1	0	1	0	0	0	0	0	0	0	0	0	1	1	0	2	1	1	1	0	2	1	100	50	50	0
215	0	6	0	0	0	0	0	0	0	0	0	0	0	0	0	0	0	0	0	0	0	0	0	0	0	0	0	1	#DIV/0!	#DIV/0!	#DIV/0!	#DIV/0!
216	0	6	0	0	1	0	2	0	2	0	0	0	0	0	0	0	0	0	3	2	0	5	3	2	3	0	5	1	100	40	60	0
217	0	6	0	0	0	0	0	0	0	0	0	0	0	0	0	0	0	0	0	0	0	0	0	0	0	0	0	1	#DIV/0!	#DIV/0!	#DIV/0!	#DIV/0!
218	0	6	0	0	1	0	0	0	1	0	0	0	0	0	0	0	0	0	2	0	0	2	2	0	1	0	2	1	100	0	50	0
219	0	6	0	0	0	0	1	0	1	0	0	0	0	0	0	0	0	0	1	1	0	2	1	1	1	0	2	1	100	50	50	0
220	0	6	0	0	0	0	1	0	1	0	0	0	0	0	0	0	0	0	1	1	0	2	1	1	1	0	2	1	100	50	50	0
221	0	6	0	0	0	0	0	0	0	0	0	0	0	0	0	0	0	0	0	0	0	0	0	0	0	0	0	1	#DIV/0!	#DIV/0!	#DIV/0!	#DIV/0!
222	0	6	0	0	0	0	0	0	0	0	0	0	0	0	0	0	0	0	0	0	0	0	0	0	0	0	0	1	#DIV/0!	#DIV/0!	#DIV/0!	#DIV/0!
223	0	6	0	0	0	0	0	0	1	0	0	0	0	0	0	0	0	0	1	0	0	1	1	0	0	0	1	1	100	0	0	0
224	0	6	0	0	0	0	0	0	0	0	0	0	0	0	0	0	0	0	0	0	0	0	0	0	0	0	0	1	#DIV/0!	#DIV/0!	#DIV/0!	#DIV/0!
225	0	6	0	0	0	0	0	0	0	0	0	0	0	0	0	0	0	0	0	0	0	0	0	0	0	0	0	1	#DIV/0!	#DIV/0!	#DIV/0!	#DIV/0!
226	0	6	0	0	0	0	2	0	2	0	0	0	0	0	0	0	0	0	2	2	0	4	2	2	2	0	4	1	100	50	50	0
227	0	6	0	0	1	0	0	0	0	0	0	0	0	0	0	0	0	0	1	0	0	1	1	0	1	0	1	1	100	0	100	0
228	0	6	0	0	0	0	0	0	0	0	0	0	0	0	0	0	0	0	0	0	0	0	0	0	0	0	0	1	#DIV/0!	#DIV/0!	#DIV/0!	#DIV/0!
229	0	6	0	0	3	0	2	0	4	0	0	0	0	0	0	0	0	0	7	2	0	9	7	2	5	0	9	1	100	22.2222	55.5556	0
230	0	6	0	0	0	0	0	0	0	0	0	0	0	0	0	0	0	0	0	0	0	0	0	0	0	0	0	1	#DIV/0!	#DIV/0!	#DIV/0!	#DIV/0!
231	0	6	0	0	1	0	1	0	1	0	0	0	0	0	0	0	0	0	2	1	0	3	2	1	2	0	3	1	100	33.3333	66.6667	0
232	0	6	0	0	0	1	0	1	0	0	0	0	0	0	0	0	1	1	0	0	2	0	1	1	1	0	2	1	0	50	50	0
233	0	6	0	0	5	0	6	0	6	0	0	0	0	0	0	0	0	0	11	6	0	17	11	6	11	0	17	1	100	35.2941	64.7059	0
234	0	6	0	0	2	0	0	0	5	0	0	0	0	0	0	0	0	0	7	0	0	7	7	0	2	0	7	1	100	0	28.5714	0
235	0	6	0	0	0	0	1	0	1	0	0	0	0	0	0	0	0	0	1	1	0	2	1	1	1	0	2	1	100	50	50	0
236	0	6	0	0	0	0	1	0	3	0	0	0	0	0	0	0	0	0	3	1	0	4	3	1	1	0	4	1	100	25	25	0
237	0	6	0	0	0	0	0	0	0	0	0	0	0	0	0	0	0	0	0	0	0	0	0	0	0	0	0	1	#DIV/0!	#DIV/0!	#DIV/0!	#DIV/0!
238	0	6	0	0	4	0	0	0	2	0	0	0	0	0	0	0	0	0	6	0	0	6	6	0	4	0	6	1	100	0	66.6667	0
239	0	6	0	0	2	0	0	0	0	0	0	0	0	0	0	0	0	0	2	0	0	2	2	0	2	0	2	1	100	0	100	0
240	0	6	0	1	3	0	0	0	2	0	0	0	0	0	0	0	1	0	5	0	1	5	6	0	4	0	6	1	83.3333	0	66.6667	0
241	0	6	0	2	69	1	37	0	75	0	0	0	0	0	0	0	2	1	144	37	3	181	146	38	109	0	184	1	98.3696	20.6522	59.2391	0
242	0	6	0	0	19	0	18	0	36	0	0	0	0	0	0	0	0	0	55	18	0	73	55	18	37	0	73	1	100	24.6575	50.6849	0
122	0	7	0	0	0	0	10	0	9	0	0	0	0	0	0	0	0	0	9	10	0	19	9	10	10	0	19	1	100	52.6316	52.6316	0
123	0	7	0	0	0	1	9	1	8	0	3	0	0	0	0	3	1	1	8	12	2	20	9	13	10	0	22	1	90.9091	59.0909	45.4545	0
124	0	7	0	4	0	6	15	6	16	0	0	0	0	0	0	0	10	6	16	15	16	31	26	21	25	0	47	1	65.9574	44.6809	53.1915	0
125	0	7	0	0	5	1	13	1	12	0	0	0	0	0	0	0	1	1	17	13	2	30	18	14	19	0	32	1	93.75	43.75	59.375	0
126	0	7	0	0	0	8	18	8	16	0	1	0	0	0	0	1	8	8	16	19	16	35	24	27	26	0	51	1	68.6275	52.9412	50.9804	0
127	0	7	0	0	0	0	39	0	39	0	6	0	0	0	0	6	0	0	39	45	0	84	39	45	39	0	84	1	100	53.5714	46.4286	0
128	0	7	0	0	0	4	8	4	8	0	0	0	0	0	0	0	4	4	8	8	8	16	12	12	12	0	24	1	66.6667	50	50	0
129	0	7	0	0	1	3	29	2	29	6	11	0	0	0	0	17	2	9	30	40	11	70	32	49	33	0	81	1	86.4198	60.4938	40.7407	0
130	0	7	0	0	0	0	9	0	9	0	0	0	0	0	0	0	0	0	9	9	0	18	9	9	9	0	18	1	100	50	50	0
131	0	7	0	0	0	2	7	1	5	0	2	0	0	0	0	2	1	2	5	9	3	14	6	11	9	0	17	1	82.3529	64.7059	52.9412	0
132	0	7	0	0	0	2	6	2	6	0	1	0	0	0	0	1	2	2	6	7	4	13	8	9	8	0	17	1	76.4706	52.9412	47.0588	0
133	0	7	0	0	0	1	1	1	0	0	7	0	0	0	0	7	1	1	0	8	2	8	1	9	2	0	10	1	80	90	20	0
134	0	7	0	0	3	1	4	1	3	0	1	0	0	0	0	1	1	1	6	5	2	11	7	6	8	0	13	1	84.6154	46.1538	61.5385	0
135	0	7	0	0	1	3	2	3	2	1	0	0	0	0	0	1	3	4	3	2	7	5	6	6	6	0	12	1	41.6667	50	50	0
136	0	7	0	0	0	3	19	3	17	0	0	0	0	0	0	0	3	3	17	19	6	36	20	22	22	0	42	1	85.7143	52.381	52.381	0
137	0	7	0	0	0	0	5	0	5	0	2	0	0	0	0	2	0	0	5	7	0	12	5	7	5	0	12	1	100	58.3333	41.6667	0
138	0	7	0	0	0	1	14	0	13	0	0	0	0	0	0	0	0	1	13	14	1	27	13	15	15	0	28	1	96.4286	53.5714	53.5714	0
139	0	7	0	0	0	0	9	0	9	0	0	0	0	0	0	0	0	0	9	9	0	18	9	9	9	0	18	1	100	50	50	0
140	0	7	0	0	0	0	14	0	11	0	5	0	0	0	0	5	0	0	11	19	0	30	11	19	14	0	30	1	100	63.3333	46.6667	0
141	0	7	0	0	0	1	3	1	3	0	0	0	0	0	0	0	1	1	3	3	2	6	4	4	4	0	8	1	75	50	50	0
142	0	7	0	0	1	3	5	3	5	0	0	0	0	0	0	0	3	3	6	5	6	11	9	8	9	0	17	1	64.7059	47.0588	52.9412	0
143	0	7	0	0	0	1	1	1	1	0	0	0	0	0	0	0	1	1	1	1	2	2	2	2	2	0	4	1	50	50	50	0
144	0	7	0	0	0	1	4	1	4	0	0	0	0	0	0	0	1	1	4	4	2	8	5	5	5	0	10	1	80	50	50	0
145	0	7	0	0	0	0	1	0	1	0	0	0	0	0	0	0	0	0	1	1	0	2	1	1	1	0	2	1	100	50	50	0
146	0	7	0	0	1	1	3	1	3	0	2	0	0	0	0	2	1	1	4	5	2	9	5	6	5	0	11	1	81.8182	54.5455	45.4545	0
147	0	7	0	0	3	0	3	0	3	0	2	0	0	0	0	2	0	0	6	5	0	11	6	5	6	0	11	1	100	45.4545	54.5455	0
148	0	7	0	0	0	0	5	0	4	0	0	0	0	0	0	0	0	0	4	5	0	9	4	5	5	0	9	1	100	55.5556	55.5556	0
149	0	7	0	0	0	2	12	2	12	0	1	0	0	0	0	1	2	2	12	13	4	25	14	15	14	0	29	1	86.2069	51.7241	48.2759	0
150	0	7	0	0	0	1	5	1	5	1	1	0	0	0	0	2	1	2	5	6	3	11	6	8	6	0	14	1	78.5714	57.1429	42.8571	0
151	0	7	0	0	0	0	4	0	4	0	0	0	0	0	0	0	0	0	4	4	0	8	4	4	4	0	8	1	100	50	50	0
152	0	7	0	0	1	1	9	1	10	1	1	0	0	0	0	2	1	2	11	10	3	21	12	12	11	0	24	1	87.5	50	45.8333	0
153	0	7	0	0	0	1	3	1	3	0	0	0	0	0	0	0	1	1	3	3	2	6	4	4	4	0	8	1	75	50	50	0
154	0	7	0	0	0	0	4	0	4	0	0	0	0	0	0	0	0	0	4	4	0	8	4	4	4	0	8	1	100	50	50	0
155	0	7	0	0	1	2	1	2	1	0	1	0	0	0	0	1	2	2	2	2	4	4	4	4	4	0	8	1	50	50	50	0
156	0	7	0	0	0	1	3	1	3	0	0	0	0	0	0	0	1	1	3	3	2	6	4	4	4	0	8	1	75	50	50	0
157	0	7	0	0	4	0	3	0	3	0	0	0	0	0	0	0	0	0	7	3	0	10	7	3	7	0	10	1	100	30	70	0
158	0	7	0	0	0	0	1	0	1	0	0	0	0	0	0	0	0	0	1	1	0	2	1	1	1	0	2	1	100	50	50	0
159	0	7	0	0	0	1	3	0	3	0	0	0	0	0	0	0	0	1	3	3	1	6	3	4	4	0	7	1	85.7143	57.1429	57.1429	0
160	0	7	0	0	0	0	6	0	6	0	1	0	0	0	0	1	0	0	6	7	0	13	6	7	6	0	13	1	100	53.8462	46.1538	0
161	0	7	0	0	0	2	1	2	1	0	0	0	0	0	0	0	2	2	1	1	4	2	3	3	3	0	6	1	33.3333	50	50	0
162	0	7	0	0	0	0	2	0	2	0	0	0	0	0	0	0	0	0	2	2	0	4	2	2	2	0	4	1	100	50	50	0
163	0	7	0	4	4	4	2	4	2	0	0	0	0	0	0	0	8	4	6	2	12	8	14	6	14	0	20	1	40	30	70	0
164	0	7	0	0	3	2	1	2	1	1	0	0	0	0	0	1	2	3	4	1	5	5	6	4	6	0	10	1	50	40	60	0
165	0	7	0	0	2	0	1	0	1	0	0	0	0	0	0	0	0	0	3	1	0	4	3	1	3	0	4	1	100	25	75	0
166	0	7	0	0	0	2	4	2	4	0	0	0	0	0	0	0	2	2	4	4	4	8	6	6	6	0	12	1	66.6667	50	50	0
167	0	7	0	1	0	0	0	0	0	0	0	0	0	0	0	0	1	0	0	0	1	0	1	0	1	0	1	1	0	0	100	0
168	0	7	0	0	1	0	1	0	3	0	0	0	0	0	0	0	0	0	4	1	0	5	4	1	2	0	5	1	100	20	40	0
169	0	7	0	0	0	0	2	0	3	0	0	0	0	0	0	0	0	0	3	2	0	5	3	2	2	0	5	1	100	40	40	0
170	0	7	0	0	9	0	1	0	1	0	0	0	0	0	0	0	0	0	10	1	0	11	10	1	10	0	11	1	100	9.09091	90.9091	0
171	0	7	0	0	0	1	1	1	1	0	0	0	0	0	0	0	1	1	1	1	2	2	2	2	2	0	4	1	50	50	50	0
172	0	7	0	0	1	0	3	0	3	0	0	0	0	0	0	0	0	0	4	3	0	7	4	3	4	0	7	1	100	42.8571	57.1429	0
173	0	7	0	0	2	0	3	0	3	0	1	0	0	0	0	1	0	0	5	4	0	9	5	4	5	0	9	1	100	44.4444	55.5556	0
174	0	7	0	0	2	0	1	0	1	0	0	0	0	0	0	0	0	0	3	1	0	4	3	1	3	0	4	1	100	25	75	0
175	0	7	0	0	0	0	2	0	2	0	0	0	0	0	0	0	0	0	2	2	0	4	2	2	2	0	4	1	100	50	50	0
176	0	7	0	0	0	0	0	0	0	0	0	0	0	0	0	0	0	0	0	0	0	0	0	0	0	0	0	1	#DIV/0!	#DIV/0!	#DIV/0!	#DIV/0!
177	0	7	0	0	0	0	1	0	1	0	0	0	0	0	0	0	0	0	1	1	0	2	1	1	1	0	2	1	100	50	50	0
178	0	7	0	0	4	0	0	0	0	0	0	0	0	0	0	0	0	0	4	0	0	4	4	0	4	0	4	1	100	0	100	0
179	0	7	0	0	2	0	6	0	5	0	0	0	0	0	0	0	0	0	7	6	0	13	7	6	8	0	13	1	100	46.1538	61.5385	0
180	0	7	0	2	0	0	0	0	0	0	0	0	0	0	0	0	2	0	0	0	2	0	2	0	2	0	2	1	0	0	100	0
181	0	7	0	0	0	0	0	0	0	0	1	0	0	0	0	1	0	0	0	1	0	1	0	1	0	0	1	1	100	100	0	0
182	0	7	0	0	0	0	0	0	0	0	0	0	0	0	0	0	0	0	0	0	0	0	0	0	0	0	0	1	#DIV/0!	#DIV/0!	#DIV/0!	#DIV/0!
183	0	7	0	0	0	0	1	0	1	0	0	0	0	0	0	0	0	0	1	1	0	2	1	1	1	0	2	1	100	50	50	0
184	0	7	0	0	0	0	2	0	2	0	0	0	0	0	0	0	0	0	2	2	0	4	2	2	2	0	4	1	100	50	50	0
185	0	7	0	1	0	0	1	0	1	0	0	0	0	0	0	0	1	0	1	1	1	2	2	1	2	0	3	1	66.6667	33.3333	66.6667	0
186	0	7	0	0	0	0	2	0	2	0	0	0	0	0	0	0	0	0	2	2	0	4	2	2	2	0	4	1	100	50	50	0
187	0	7	0	0	0	0	0	0	0	0	0	0	0	0	0	0	0	0	0	0	0	0	0	0	0	0	0	1	#DIV/0!	#DIV/0!	#DIV/0!	#DIV/0!
188	0	7	0	0	0	0	1	0	1	0	0	0	0	0	0	0	0	0	1	1	0	2	1	1	1	0	2	1	100	50	50	0
189	0	7	0	0	0	0	0	0	0	0	0	0	0	0	0	0	0	0	0	0	0	0	0	0	0	0	0	1	#DIV/0!	#DIV/0!	#DIV/0!	#DIV/0!
190	0	7	0	0	0	1	0	1	0	0	0	0	0	0	0	0	1	1	0	0	2	0	1	1	1	0	2	1	0	50	50	0
191	0	7	0	0	0	0	0	0	0	0	0	0	0	0	0	0	0	0	0	0	0	0	0	0	0	0	0	1	#DIV/0!	#DIV/0!	#DIV/0!	#DIV/0!
192	0	7	0	0	0	0	3	0	3	0	0	0	0	0	0	0	0	0	3	3	0	6	3	3	3	0	6	1	100	50	50	0
193	0	7	0	0	0	0	2	0	2	0	0	0	0	0	0	0	0	0	2	2	0	4	2	2	2	0	4	1	100	50	50	0
194	0	7	0	0	0	0	1	0	2	0	3	0	0	0	0	3	0	0	2	4	0	6	2	4	1	0	6	1	100	66.6667	16.6667	0
195	0	7	0	0	0	0	7	0	8	0	0	0	0	0	0	0	0	0	8	7	0	15	8	7	7	0	15	1	100	46.6667	46.6667	0
196	0	7	0	0	0	0	1	0	1	0	0	0	0	0	0	0	0	0	1	1	0	2	1	1	1	0	2	1	100	50	50	0
197	0	7	0	0	0	0	0	0	1	0	0	0	0	0	0	0	0	0	1	0	0	1	1	0	0	0	1	1	100	0	0	0
198	0	7	0	0	0	0	1	0	1	0	0	0	0	0	0	0	0	0	1	1	0	2	1	1	1	0	2	1	100	50	50	0
199	0	7	0	0	0	0	0	0	0	0	0	0	0	0	0	0	0	0	0	0	0	0	0	0	0	0	0	1	#DIV/0!	#DIV/0!	#DIV/0!	#DIV/0!
200	0	7	0	0	1	0	1	0	1	0	0	0	0	0	0	0	0	0	2	1	0	3	2	1	2	0	3	1	100	33.3333	66.6667	0
201	0	7	0	0	1	0	0	0	0	0	0	0	0	0	0	0	0	0	1	0	0	1	1	0	1	0	1	1	100	0	100	0
202	0	7	0	0	0	0	0	0	0	0	0	0	0	0	0	0	0	0	0	0	0	0	0	0	0	0	0	1	#DIV/0!	#DIV/0!	#DIV/0!	#DIV/0!
203	0	7	0	0	0	0	1	0	1	0	0	0	0	0	0	0	0	0	1	1	0	2	1	1	1	0	2	1	100	50	50	0
204	0	7	0	0	1	1	0	0	0	0	0	0	0	0	0	0	0	1	1	0	1	1	1	1	2	0	2	1	50	50	100	0
205	0	7	0	0	0	0	0	0	0	0	0	0	0	0	0	0	0	0	0	0	0	0	0	0	0	0	0	1	#DIV/0!	#DIV/0!	#DIV/0!	#DIV/0!
206	0	7	0	0	0	0	4	0	4	0	0	0	0	0	0	0	0	0	4	4	0	8	4	4	4	0	8	1	100	50	50	0
207	0	7	0	0	0	0	1	0	1	0	0	0	0	0	0	0	0	0	1	1	0	2	1	1	1	0	2	1	100	50	50	0
208	0	7	0	0	1	0	2	0	2	0	0	0	0	0	0	0	0	0	3	2	0	5	3	2	3	0	5	1	100	40	60	0
209	0	7	0	0	0	0	2	0	2	0	0	0	0	0	0	0	0	0	2	2	0	4	2	2	2	0	4	1	100	50	50	0
210	0	7	0	0	0	0	1	0	1	0	0	0	0	0	0	0	0	0	1	1	0	2	1	1	1	0	2	1	100	50	50	0
211	0	7	0	0	0	0	0	0	0	0	0	0	0	0	0	0	0	0	0	0	0	0	0	0	0	0	0	1	#DIV/0!	#DIV/0!	#DIV/0!	#DIV/0!
212	0	7	0	0	0	0	2	0	3	0	0	0	0	0	0	0	0	0	3	2	0	5	3	2	2	0	5	1	100	40	40	0
213	0	7	0	0	1	0	1	0	1	0	0	0	0	0	0	0	0	0	2	1	0	3	2	1	2	0	3	1	100	33.3333	66.6667	0
214	0	7	0	0	0	0	0	0	0	0	0	0	0	0	0	0	0	0	0	0	0	0	0	0	0	0	0	1	#DIV/0!	#DIV/0!	#DIV/0!	#DIV/0!
215	0	7	0	0	0	0	1	0	1	0	0	0	0	0	0	0	0	0	1	1	0	2	1	1	1	0	2	1	100	50	50	0
216	0	7	0	0	0	0	0	0	0	0	0	0	0	0	0	0	0	0	0	0	0	0	0	0	0	0	0	1	#DIV/0!	#DIV/0!	#DIV/0!	#DIV/0!
217	0	7	0	0	0	0	1	0	1	0	0	0	0	0	0	0	0	0	1	1	0	2	1	1	1	0	2	1	100	50	50	0
218	0	7	0	0	0	0	0	0	0	0	0	0	0	0	0	0	0	0	0	0	0	0	0	0	0	0	0	1	#DIV/0!	#DIV/0!	#DIV/0!	#DIV/0!
219	0	7	0	0	0	0	0	0	0	0	0	0	0	0	0	0	0	0	0	0	0	0	0	0	0	0	0	1	#DIV/0!	#DIV/0!	#DIV/0!	#DIV/0!
220	0	7	0	0	0	0	0	0	0	0	0	0	0	0	0	0	0	0	0	0	0	0	0	0	0	0	0	1	#DIV/0!	#DIV/0!	#DIV/0!	#DIV/0!
221	0	7	0	0	0	0	0	0	0	0	0	0	0	0	0	0	0	0	0	0	0	0	0	0	0	0	0	1	#DIV/0!	#DIV/0!	#DIV/0!	#DIV/0!
222	0	7	0	0	0	0	0	0	0	0	0	0	0	0	0	0	0	0	0	0	0	0	0	0	0	0	0	1	#DIV/0!	#DIV/0!	#DIV/0!	#DIV/0!
223	0	7	0	0	0	0	0	0	0	0	0	0	0	0	0	0	0	0	0	0	0	0	0	0	0	0	0	1	#DIV/0!	#DIV/0!	#DIV/0!	#DIV/0!
224	0	7	0	0	0	0	0	0	0	0	0	0	0	0	0	0	0	0	0	0	0	0	0	0	0	0	0	1	#DIV/0!	#DIV/0!	#DIV/0!	#DIV/0!
225	0	7	0	0	0	0	1	0	1	0	0	0	0	0	0	0	0	0	1	1	0	2	1	1	1	0	2	1	100	50	50	0
226	0	7	0	0	1	0	2	0	2	0	0	0	0	0	0	0	0	0	3	2	0	5	3	2	3	0	5	1	100	40	60	0
227	0	7	0	0	0	0	0	0	0	0	0	0	0	0	0	0	0	0	0	0	0	0	0	0	0	0	0	1	#DIV/0!	#DIV/0!	#DIV/0!	#DIV/0!
228	0	7	0	1	1	0	0	0	1	0	0	0	0	0	0	0	1	0	2	0	1	2	3	0	2	0	3	1	66.6667	0	66.6667	0
229	0	7	0	0	0	0	0	0	0	0	0	0	0	0	0	0	0	0	0	0	0	0	0	0	0	0	0	1	#DIV/0!	#DIV/0!	#DIV/0!	#DIV/0!
230	0	7	0	0	0	0	0	0	1	0	0	0	0	0	0	0	0	0	1	0	0	1	1	0	0	0	1	1	100	0	0	0
231	0	7	0	0	0	0	0	0	0	0	0	0	0	0	0	0	0	0	0	0	0	0	0	0	0	0	0	1	#DIV/0!	#DIV/0!	#DIV/0!	#DIV/0!
232	0	7	0	0	0	0	2	0	2	0	0	0	0	0	0	0	0	0	2	2	0	4	2	2	2	0	4	1	100	50	50	0
233	0	7	0	0	0	0	2	0	2	0	0	0	0	0	0	0	0	0	2	2	0	4	2	2	2	0	4	1	100	50	50	0
234	0	7	0	0	4	0	0	0	0	0	0	0	0	0	0	0	0	0	4	0	0	4	4	0	4	0	4	1	100	0	100	0
235	0	7	0	0	2	0	1	0	1	0	0	0	0	0	0	0	0	0	3	1	0	4	3	1	3	0	4	1	100	25	75	0
236	0	7	0	0	1	0	1	0	1	0	0	0	0	0	0	0	0	0	2	1	0	3	2	1	2	0	3	1	100	33.3333	66.6667	0
237	0	7	0	0	1	0	1	0	4	0	0	0	0	0	0	0	0	0	5	1	0	6	5	1	2	0	6	1	100	16.6667	33.3333	0
238	0	7	0	0	1	0	0	0	0	0	0	0	0	0	0	0	0	0	1	0	0	1	1	0	1	0	1	1	100	0	100	0
239	0	7	0	0	3	0	0	0	1	0	0	0	0	0	0	0	0	0	4	0	0	4	4	0	3	0	4	1	100	0	75	0
240	0	7	0	0	2	0	0	0	2	0	0	0	0	0	0	0	0	0	4	0	0	4	4	0	2	0	4	1	100	0	50	0
241	0	7	0	2	58	4	41	6	59	0	2	0	0	0	0	2	8	4	117	43	12	160	125	47	105	0	172	1	93.0233	27.3256	61.0465	0
242	0	7	0	1	14	2	28	2	34	0	0	0	0	0	0	0	3	2	48	28	5	76	51	30	45	0	81	1	93.8272	37.037	55.5556	0
122	0	8	0	0	12	0	0	0	7	0	0	0	0	0	0	0	0	0	19	0	0	19	19	0	12	0	19	1	100	0	63.1579	0
123	0	8	0	0	6	0	1	0	3	0	1	0	0	0	0	1	0	0	9	2	0	11	9	2	7	0	11	1	100	18.1818	63.6364	0
124	0	8	0	0	22	0	3	0	5	0	0	0	0	0	0	0	0	0	27	3	0	30	27	3	25	0	30	1	100	10	83.3333	0
125	0	8	0	0	22	0	1	0	8	0	0	0	0	0	0	0	0	0	30	1	0	31	30	1	23	0	31	1	100	3.22581	74.1935	0
126	0	8	0	0	22	0	0	0	10	0	0	0	0	0	0	0	0	0	32	0	0	32	32	0	22	0	32	1	100	0	68.75	0
127	0	8	0	0	50	0	2	0	7	0	0	0	0	0	0	0	0	0	57	2	0	59	57	2	52	0	59	1	100	3.38983	88.1356	0
128	0	8	0	0	12	1	7	1	29	0	0	0	0	0	0	0	1	1	41	7	2	48	42	8	20	0	50	1	96	16	40	0
129	0	8	0	0	15	0	3	0	6	0	0	0	0	0	0	0	0	0	21	3	0	24	21	3	18	0	24	1	100	12.5	75	0
130	0	8	0	0	46	1	8	0	18	1	0	0	0	0	0	1	0	2	64	8	2	72	64	10	55	0	74	1	97.2973	13.5135	74.3243	0
131	0	8	0	0	21	0	3	0	6	0	0	0	0	0	0	0	0	0	27	3	0	30	27	3	24	0	30	1	100	10	80	0
132	0	8	0	0	2	0	1	0	8	0	0	0	0	0	0	0	0	0	10	1	0	11	10	1	3	0	11	1	100	9.09091	27.2727	0
133	0	8	0	3	4	0	0	1	5	1	0	0	0	0	0	1	4	1	9	0	5	9	13	1	7	0	14	1	64.2857	7.14286	50	0
134	0	8	0	1	3	0	2	1	4	0	0	0	0	0	0	0	2	0	7	2	2	9	9	2	6	0	11	1	81.8182	18.1818	54.5455	0
135	0	8	0	1	32	0	3	0	12	0	0	0	0	0	0	0	1	0	44	3	1	47	45	3	36	0	48	1	97.9167	6.25	75	0
136	0	8	0	8	11	0	3	0	5	0	0	0	0	0	0	0	8	0	16	3	8	19	24	3	22	0	27	1	70.3704	11.1111	81.4815	0
137	0	8	0	0	7	0	0	0	0	0	0	0	0	0	0	0	0	0	7	0	0	7	7	0	7	0	7	1	100	0	100	0
138	0	8	0	0	15	0	2	0	2	0	0	0	0	0	0	0	0	0	17	2	0	19	17	2	17	0	19	1	100	10.5263	89.4737	0
139	0	8	0	0	5	0	1	0	14	0	0	0	0	0	0	0	0	0	19	1	0	20	19	1	6	0	20	1	100	5	30	0
140	0	8	0	0	3	0	1	0	10	0	0	0	0	0	0	0	0	0	13	1	0	14	13	1	4	0	14	1	100	7.14286	28.5714	0
141	0	8	0	3	28	0	4	0	12	0	0	0	0	0	0	0	3	0	40	4	3	44	43	4	35	0	47	1	93.617	8.51064	74.4681	0
142	0	8	0	3	12	0	0	0	8	1	0	0	0	0	0	1	3	1	20	0	4	20	23	1	15	0	24	1	83.3333	4.16667	62.5	0
143	0	8	0	1	7	0	0	0	2	0	0	0	0	0	0	0	1	0	9	0	1	9	10	0	8	0	10	1	90	0	80	0
144	0	8	0	0	1	0	1	0	3	0	0	0	0	0	0	0	0	0	4	1	0	5	4	1	2	0	5	1	100	20	40	0
145	0	8	0	0	3	0	0	0	3	0	0	0	0	0	0	0	0	0	6	0	0	6	6	0	3	0	6	1	100	0	50	0
146	0	8	0	1	2	1	5	2	5	0	0	0	0	0	0	0	3	1	7	5	4	12	10	6	9	0	16	1	75	37.5	56.25	0
147	0	8	0	0	21	0	4	1	12	0	0	0	0	0	0	0	1	0	33	4	1	37	34	4	25	0	38	1	97.3684	10.5263	65.7895	0
148	0	8	0	0	9	0	0	0	1	0	0	0	0	0	0	0	0	0	10	0	0	10	10	0	9	0	10	1	100	0	90	0
149	0	8	0	0	3	0	0	0	3	0	1	0	0	0	0	1	0	0	6	1	0	7	6	1	3	0	7	1	100	14.2857	42.8571	0
150	0	8	0	0	4	2	1	0	3	0	0	0	0	0	0	0	0	2	7	1	2	8	7	3	7	0	10	1	80	30	70	0
151	0	8	0	0	3	0	0	0	2	0	1	0	0	0	0	1	0	0	5	1	0	6	5	1	3	0	6	1	100	16.6667	50	0
152	0	8	0	0	10	0	2	0	11	0	0	0	0	0	0	0	0	0	21	2	0	23	21	2	12	0	23	1	100	8.69565	52.1739	0
153	0	8	0	8	16	0	2	0	5	0	0	0	0	0	0	0	8	0	21	2	8	23	29	2	26	0	31	1	74.1935	6.45161	83.871	0
154	0	8	0	1	6	0	0	0	3	0	0	0	0	0	0	0	1	0	9	0	1	9	10	0	7	0	10	1	90	0	70	0
155	0	8	0	0	4	0	0	0	1	0	0	0	0	0	0	0	0	0	5	0	0	5	5	0	4	0	5	1	100	0	80	0
156	0	8	0	0	3	0	0	0	1	0	0	0	0	0	0	0	0	0	4	0	0	4	4	0	3	0	4	1	100	0	75	0
157	0	8	0	0	0	0	0	0	2	0	0	0	0	0	0	0	0	0	2	0	0	2	2	0	0	0	2	1	100	0	0	0
158	0	8	0	0	8	0	0	0	1	0	0	0	0	0	0	0	0	0	9	0	0	9	9	0	8	0	9	1	100	0	88.8889	0
159	0	8	0	1	5	0	0	0	1	0	0	0	0	0	0	0	1	0	6	0	1	6	7	0	6	0	7	1	85.7143	0	85.7143	0
160	0	8	0	2	0	0	1	0	3	0	0	0	0	0	0	0	2	0	3	1	2	4	5	1	3	0	6	1	66.6667	16.6667	50	0
161	0	8	0	1	1	0	0	0	1	0	0	0	0	0	0	0	1	0	2	0	1	2	3	0	2	0	3	1	66.6667	0	66.6667	0
162	0	8	0	0	2	0	0	0	2	0	0	0	0	0	0	0	0	0	4	0	0	4	4	0	2	0	4	1	100	0	50	0
163	0	8	0	7	10	0	0	0	8	0	0	0	0	0	0	0	7	0	18	0	7	18	25	0	17	0	25	1	72	0	68	0
164	0	8	0	1	13	0	1	0	4	0	0	0	0	0	0	0	1	0	17	1	1	18	18	1	15	0	19	1	94.7368	5.26316	78.9474	0
165	0	8	0	0	4	0	0	0	2	0	0	0	0	0	0	0	0	0	6	0	0	6	6	0	4	0	6	1	100	0	66.6667	0
166	0	8	0	1	5	0	0	0	3	0	0	0	0	0	0	0	1	0	8	0	1	8	9	0	6	0	9	1	88.8889	0	66.6667	0
167	0	8	0	0	6	0	2	0	4	0	0	0	0	0	0	0	0	0	10	2	0	12	10	2	8	0	12	1	100	16.6667	66.6667	0
168	0	8	0	0	11	0	0	0	3	0	0	0	0	0	0	0	0	0	14	0	0	14	14	0	11	0	14	1	100	0	78.5714	0
169	0	8	0	4	3	0	0	0	1	0	0	0	0	0	0	0	4	0	4	0	4	4	8	0	7	0	8	1	50	0	87.5	0
170	0	8	0	2	7	0	0	0	1	0	0	0	0	0	0	0	2	0	8	0	2	8	10	0	9	0	10	1	80	0	90	0
171	0	8	0	0	7	0	0	0	4	0	0	0	0	0	0	0	0	0	11	0	0	11	11	0	7	0	11	1	100	0	63.6364	0
172	0	8	0	0	3	0	0	0	1	0	0	0	0	0	0	0	0	0	4	0	0	4	4	0	3	0	4	1	100	0	75	0
173	0	8	0	0	1	0	0	0	0	0	0	0	0	0	0	0	0	0	1	0	0	1	1	0	1	0	1	1	100	0	100	0
174	0	8	0	1	1	0	0	0	0	0	0	0	0	0	0	0	1	0	1	0	1	1	2	0	2	0	2	1	50	0	100	0
175	0	8	0	0	0	0	0	0	2	0	0	0	0	0	0	0	0	0	2	0	0	2	2	0	0	0	2	1	100	0	0	0
176	0	8	0	0	2	0	0	0	1	0	0	0	0	0	0	0	0	0	3	0	0	3	3	0	2	0	3	1	100	0	66.6667	0
177	0	8	0	0	1	0	0	0	0	0	0	0	0	0	0	0	0	0	1	0	0	1	1	0	1	0	1	1	100	0	100	0
178	0	8	0	0	1	0	0	0	0	0	0	0	0	0	0	0	0	0	1	0	0	1	1	0	1	0	1	1	100	0	100	0
179	0	8	0	0	5	0	0	0	0	0	0	0	0	0	0	0	0	0	5	0	0	5	5	0	5	0	5	1	100	0	100	0
180	0	8	0	1	5	0	2	0	3	0	0	0	0	0	0	0	1	0	8	2	1	10	9	2	8	0	11	1	90.9091	18.1818	72.7273	0
181	0	8	0	0	2	0	0	0	0	0	0	0	0	0	0	0	0	0	2	0	0	2	2	0	2	0	2	1	100	0	100	0
182	0	8	0	0	0	0	0	0	0	0	0	0	0	0	0	0	0	0	0	0	0	0	0	0	0	0	0	1	#DIV/0!	#DIV/0!	#DIV/0!	#DIV/0!
183	0	8	0	0	2	0	1	0	6	0	0	0	0	0	0	0	0	0	8	1	0	9	8	1	3	0	9	1	100	11.1111	33.3333	0
184	0	8	0	0	3	0	0	0	1	0	0	0	0	0	0	0	0	0	4	0	0	4	4	0	3	0	4	1	100	0	75	0
185	0	8	0	1	7	0	3	1	8	0	0	0	0	0	0	0	2	0	15	3	2	18	17	3	11	0	20	1	90	15	55	0
186	0	8	0	0	1	0	0	0	0	0	0	0	0	0	0	0	0	0	1	0	0	1	1	0	1	0	1	1	100	0	100	0
187	0	8	0	0	1	0	0	0	0	0	0	0	0	0	0	0	0	0	1	0	0	1	1	0	1	0	1	1	100	0	100	0
188	0	8	0	0	2	0	0	0	1	0	0	0	0	0	0	0	0	0	3	0	0	3	3	0	2	0	3	1	100	0	66.6667	0
189	0	8	0	0	1	0	0	0	1	0	0	0	0	0	0	0	0	0	2	0	0	2	2	0	1	0	2	1	100	0	50	0
190	0	8	0	0	0	0	0	0	0	0	0	0	0	0	0	0	0	0	0	0	0	0	0	0	0	0	0	1	#DIV/0!	#DIV/0!	#DIV/0!	#DIV/0!
191	0	8	0	0	2	0	0	0	0	0	0	0	0	0	0	0	0	0	2	0	0	2	2	0	2	0	2	1	100	0	100	0
192	0	8	0	0	0	0	0	0	2	0	0	0	0	0	0	0	0	0	2	0	0	2	2	0	0	0	2	1	100	0	0	0
193	0	8	0	0	5	0	0	1	1	0	0	0	0	0	0	0	1	0	6	0	1	6	7	0	5	0	7	1	85.7143	0	71.4286	0
194	0	8	0	0	1	0	0	0	2	0	0	0	0	0	0	0	0	0	3	0	0	3	3	0	1	0	3	1	100	0	33.3333	0
195	0	8	0	0	0	0	1	0	2	0	0	0	0	0	0	0	0	0	2	1	0	3	2	1	1	0	3	1	100	33.3333	33.3333	0
196	0	8	0	1	0	0	0	0	3	0	0	0	0	0	0	0	1	0	3	0	1	3	4	0	1	0	4	1	75	0	25	0
197	0	8	0	0	1	0	0	0	1	0	0	0	0	0	0	0	0	0	2	0	0	2	2	0	1	0	2	1	100	0	50	0
198	0	8	0	0	1	0	0	0	4	0	0	0	0	0	0	0	0	0	5	0	0	5	5	0	1	0	5	1	100	0	20	0
199	0	8	0	0	1	0	0	0	2	0	0	0	0	0	0	0	0	0	3	0	0	3	3	0	1	0	3	1	100	0	33.3333	0
200	0	8	0	0	0	0	0	0	0	0	0	0	0	0	0	0	0	0	0	0	0	0	0	0	0	0	0	1	#DIV/0!	#DIV/0!	#DIV/0!	#DIV/0!
201	0	8	0	0	2	0	0	0	1	0	0	0	0	0	0	0	0	0	3	0	0	3	3	0	2	0	3	1	100	0	66.6667	0
202	0	8	0	0	0	0	0	0	0	0	0	0	0	0	0	0	0	0	0	0	0	0	0	0	0	0	0	1	#DIV/0!	#DIV/0!	#DIV/0!	#DIV/0!
203	0	8	0	0	0	0	0	0	0	0	0	0	0	0	0	0	0	0	0	0	0	0	0	0	0	0	0	1	#DIV/0!	#DIV/0!	#DIV/0!	#DIV/0!
204	0	8	0	0	1	0	1	0	2	0	0	0	0	0	0	0	0	0	3	1	0	4	3	1	2	0	4	1	100	25	50	0
205	0	8	0	0	1	0	0	0	1	0	0	0	0	0	0	0	0	0	2	0	0	2	2	0	1	0	2	1	100	0	50	0
206	0	8	0	0	0	0	0	0	0	0	0	0	0	0	0	0	0	0	0	0	0	0	0	0	0	0	0	1	#DIV/0!	#DIV/0!	#DIV/0!	#DIV/0!
207	0	8	0	1	3	0	1	1	7	0	0	0	0	0	0	0	2	0	10	1	2	11	12	1	5	0	13	1	84.6154	7.69231	38.4615	0
208	0	8	0	0	3	0	0	0	2	0	0	0	0	0	0	0	0	0	5	0	0	5	5	0	3	0	5	1	100	0	60	0
209	0	8	0	0	0	0	0	0	3	0	0	0	0	0	0	0	0	0	3	0	0	3	3	0	0	0	3	1	100	0	0	0
210	0	8	0	0	0	0	0	0	1	0	0	0	0	0	0	0	0	0	1	0	0	1	1	0	0	0	1	1	100	0	0	0
211	0	8	0	0	1	0	1	0	1	0	0	0	0	0	0	0	0	0	2	1	0	3	2	1	2	0	3	1	100	33.3333	66.6667	0
212	0	8	0	2	2	0	0	0	2	0	0	0	0	0	0	0	2	0	4	0	2	4	6	0	4	0	6	1	66.6667	0	66.6667	0
213	0	8	0	1	1	0	0	0	0	0	0	0	0	0	0	0	1	0	1	0	1	1	2	0	2	0	2	1	50	0	100	0
214	0	8	0	0	0	0	0	0	0	0	0	0	0	0	0	0	0	0	0	0	0	0	0	0	0	0	0	1	#DIV/0!	#DIV/0!	#DIV/0!	#DIV/0!
215	0	8	0	0	0	0	0	0	1	0	0	0	0	0	0	0	0	0	1	0	0	1	1	0	0	0	1	1	100	0	0	0
216	0	8	0	0	1	0	0	0	1	0	0	0	0	0	0	0	0	0	2	0	0	2	2	0	1	0	2	1	100	0	50	0
217	0	8	0	0	0	0	0	0	0	0	0	0	0	0	0	0	0	0	0	0	0	0	0	0	0	0	0	1	#DIV/0!	#DIV/0!	#DIV/0!	#DIV/0!
218	0	8	0	0	0	0	0	0	2	0	0	0	0	0	0	0	0	0	2	0	0	2	2	0	0	0	2	1	100	0	0	0
219	0	8	0	0	1	0	0	0	1	0	0	0	0	0	0	0	0	0	2	0	0	2	2	0	1	0	2	1	100	0	50	0
220	0	8	0	0	0	0	0	0	0	0	0	0	0	0	0	0	0	0	0	0	0	0	0	0	0	0	0	1	#DIV/0!	#DIV/0!	#DIV/0!	#DIV/0!
221	0	8	0	0	0	0	0	0	0	0	0	0	0	0	0	0	0	0	0	0	0	0	0	0	0	0	0	1	#DIV/0!	#DIV/0!	#DIV/0!	#DIV/0!
222	0	8	0	1	0	0	0	0	0	0	0	0	0	0	0	0	1	0	0	0	1	0	1	0	1	0	1	1	0	0	100	0
223	0	8	0	0	1	0	0	0	0	0	0	0	0	0	0	0	0	0	1	0	0	1	1	0	1	0	1	1	100	0	100	0
224	0	8	0	0	0	0	0	0	0	0	0	0	0	0	0	0	0	0	0	0	0	0	0	0	0	0	0	1	#DIV/0!	#DIV/0!	#DIV/0!	#DIV/0!
225	0	8	0	0	0	0	0	0	1	0	0	0	0	0	0	0	0	0	1	0	0	1	1	0	0	0	1	1	100	0	0	0
226	0	8	0	0	2	0	1	0	2	0	0	0	0	0	0	0	0	0	4	1	0	5	4	1	3	0	5	1	100	20	60	0
227	0	8	0	0	3	0	0	0	0	0	0	0	0	0	0	0	0	0	3	0	0	3	3	0	3	0	3	1	100	0	100	0
228	0	8	0	0	3	0	0	0	0	0	0	0	0	0	0	0	0	0	3	0	0	3	3	0	3	0	3	1	100	0	100	0
229	0	8	0	0	5	0	0	0	3	0	0	0	0	0	0	0	0	0	8	0	0	8	8	0	5	0	8	1	100	0	62.5	0
230	0	8	0	0	0	0	0	0	0	0	0	0	0	0	0	0	0	0	0	0	0	0	0	0	0	0	0	1	#DIV/0!	#DIV/0!	#DIV/0!	#DIV/0!
231	0	8	0	0	1	0	0	0	0	0	0	0	0	0	0	0	0	0	1	0	0	1	1	0	1	0	1	1	100	0	100	0
232	0	8	0	2	2	0	0	0	2	0	0	0	0	0	0	0	2	0	4	0	2	4	6	0	4	0	6	1	66.6667	0	66.6667	0
233	0	8	0	0	5	0	0	0	2	0	0	0	0	0	0	0	0	0	7	0	0	7	7	0	5	0	7	1	100	0	71.4286	0
234	0	8	0	0	3	0	0	0	3	0	0	0	0	0	0	0	0	0	6	0	0	6	6	0	3	0	6	1	100	0	50	0
235	0	8	0	1	0	0	0	0	1	0	0	0	0	0	0	0	1	0	1	0	1	1	2	0	1	0	2	1	50	0	50	0
236	0	8	0	0	1	0	0	0	1	0	0	0	0	0	0	0	0	0	2	0	0	2	2	0	1	0	2	1	100	0	50	0
237	0	8	0	0	1	0	0	0	1	0	0	0	0	0	0	0	0	0	2	0	0	2	2	0	1	0	2	1	100	0	50	0
238	0	8	0	0	0	0	0	0	0	0	0	0	0	0	0	0	0	0	0	0	0	0	0	0	0	0	0	1	#DIV/0!	#DIV/0!	#DIV/0!	#DIV/0!
239	0	8	0	0	0	0	0	0	3	0	0	0	0	0	0	0	0	0	3	0	0	3	3	0	0	0	3	1	100	0	0	0
240	0	8	0	1	2	0	0	0	2	0	0	0	0	0	0	0	1	0	4	0	1	4	5	0	3	0	5	1	80	0	60	0
241	0	8	0	12	157	0	9	6	68	0	1	0	0	0	0	1	18	0	225	10	18	235	243	10	178	0	253	1	92.8854	3.95257	70.3557	0
242	0	8	0	5	50	0	1	0	24	0	0	0	0	0	0	0	5	0	74	1	5	75	79	1	56	0	80	1	93.75	1.25	70	0
122	0	9	0	0	17	1	1	0	3	0	0	0	0	0	0	0	0	1	20	1	1	21	20	2	19	0	22	1	95.4545	9.09091	86.3636	0
123	0	9	0	1	6	0	3	0	5	0	0	0	0	0	0	0	1	0	11	3	1	14	12	3	10	0	15	1	93.3333	20	66.6667	0
124	0	9	0	1	4	0	4	0	8	0	1	0	0	0	0	1	1	0	12	5	1	17	13	5	9	0	18	1	94.4444	27.7778	50	0
125	0	9	0	0	23	0	4	0	14	0	0	0	0	0	0	0	0	0	37	4	0	41	37	4	27	0	41	1	100	9.7561	65.8537	0
126	0	9	0	0	6	1	2	2	4	0	0	0	0	0	0	0	2	1	10	2	3	12	12	3	9	0	15	1	80	20	60	0
127	0	9	0	0	21	0	5	0	21	0	1	0	0	0	0	1	0	0	42	6	0	48	42	6	26	0	48	1	100	12.5	54.1667	0
128	0	9	0	0	12	0	11	0	12	0	0	0	0	0	0	0	0	0	24	11	0	35	24	11	23	0	35	1	100	31.4286	65.7143	0
129	0	9	0	0	0	4	32	2	32	1	1	0	0	0	0	2	2	5	32	33	7	65	34	38	36	0	72	1	90.2778	52.7778	50	0
130	0	9	0	0	5	0	7	0	11	0	3	0	0	0	0	3	0	0	16	10	0	26	16	10	12	0	26	1	100	38.4615	46.1538	0
131	0	9	0	0	10	0	8	0	10	0	3	0	0	0	0	3	0	0	20	11	0	31	20	11	18	0	31	1	100	35.4839	58.0645	0
132	0	9	0	0	9	0	3	0	3	0	0	0	0	0	0	0	0	0	12	3	0	15	12	3	12	0	15	1	100	20	80	0
133	0	9	0	8	0	13	3	9	3	0	0	0	0	0	0	0	17	13	3	3	30	6	20	16	24	0	36	1	16.6667	44.4444	66.6667	0
134	0	9	0	0	8	2	7	2	7	0	0	0	0	0	0	0	2	2	15	7	4	22	17	9	17	0	26	1	84.6154	34.6154	65.3846	0
135	0	9	0	0	3	0	1	0	0	0	0	0	0	0	0	0	0	0	3	1	0	4	3	1	4	0	4	1	100	25	100	0
136	0	9	0	0	8	0	15	0	15	1	1	0	0	0	0	2	0	1	23	16	1	39	23	17	23	0	40	1	97.5	42.5	57.5	0
137	0	9	0	0	15	0	1	0	2	0	0	0	0	0	0	0	0	0	17	1	0	18	17	1	16	0	18	1	100	5.55556	88.8889	0
138	0	9	0	0	6	0	0	0	1	0	0	0	0	0	0	0	0	0	7	0	0	7	7	0	6	0	7	1	100	0	85.7143	0
139	0	9	0	0	5	0	7	0	7	0	0	0	0	0	0	0	0	0	12	7	0	19	12	7	12	0	19	1	100	36.8421	63.1579	0
140	0	9	0	0	0	0	5	0	20	0	1	0	0	0	0	1	0	0	20	6	0	26	20	6	5	0	26	1	100	23.0769	19.2308	0
141	0	9	0	4	9	0	6	0	8	0	0	0	0	0	0	0	4	0	17	6	4	23	21	6	19	0	27	1	85.1852	22.2222	70.3704	0
142	0	9	0	0	18	0	11	0	12	0	0	0	0	0	0	0	0	0	30	11	0	41	30	11	29	0	41	1	100	26.8293	70.7317	0
143	0	9	0	0	3	0	4	1	4	0	0	0	0	0	0	0	1	0	7	4	1	11	8	4	7	0	12	1	91.6667	33.3333	58.3333	0
144	0	9	0	0	3	0	0	0	0	0	0	0	0	0	0	0	0	0	3	0	0	3	3	0	3	0	3	1	100	0	100	0
145	0	9	0	0	6	0	1	0	2	0	0	0	0	0	0	0	0	0	8	1	0	9	8	1	7	0	9	1	100	11.1111	77.7778	0
146	0	9	0	0	1	0	3	0	2	0	0	0	0	0	0	0	0	0	3	3	0	6	3	3	4	0	6	1	100	50	66.6667	0
147	0	9	0	0	11	0	3	0	3	0	1	0	0	0	0	1	0	0	14	4	0	18	14	4	14	0	18	1	100	22.2222	77.7778	0
148	0	9	0	0	5	0	1	0	4	1	0	0	0	0	0	1	0	1	9	1	1	10	9	2	6	0	11	1	90.9091	18.1818	54.5455	0
149	0	9	0	0	6	0	2	0	4	0	0	0	0	0	0	0	0	0	10	2	0	12	10	2	8	0	12	1	100	16.6667	66.6667	0
150	0	9	0	0	2	0	5	0	6	0	0	0	0	0	0	0	0	0	8	5	0	13	8	5	7	0	13	1	100	38.4615	53.8462	0
151	0	9	0	0	0	0	2	1	4	0	0	0	0	0	0	0	1	0	4	2	1	6	5	2	2	0	7	1	85.7143	28.5714	28.5714	0
152	0	9	0	0	2	0	1	0	2	0	0	0	0	0	0	0	0	0	4	1	0	5	4	1	3	0	5	1	100	20	60	0
153	0	9	0	0	13	4	6	2	14	0	3	0	0	0	0	3	2	4	27	9	6	36	29	13	23	0	42	1	85.7143	30.9524	54.7619	0
154	0	9	0	0	0	0	1	0	4	0	0	0	0	0	0	0	0	0	4	1	0	5	4	1	1	0	5	1	100	20	20	0
155	0	9	0	0	7	0	1	0	3	0	0	0	0	0	0	0	0	0	10	1	0	11	10	1	8	0	11	1	100	9.09091	72.7273	0
156	0	9	0	0	2	0	0	0	1	0	0	0	0	0	0	0	0	0	3	0	0	3	3	0	2	0	3	1	100	0	66.6667	0
157	0	9	0	0	1	0	0	0	3	0	0	0	0	0	0	0	0	0	4	0	0	4	4	0	1	0	4	1	100	0	25	0
158	0	9	0	2	7	1	1	1	7	0	0	0	0	0	0	0	3	1	14	1	4	15	17	2	11	0	19	1	78.9474	10.5263	57.8947	0
159	0	9	0	0	2	13	2	0	2	0	0	0	0	0	0	0	0	13	4	2	13	6	4	15	17	0	19	1	31.5789	78.9474	89.4737	0
160	0	9	0	0	0	0	2	0	2	0	0	0	0	0	0	0	0	0	2	2	0	4	2	2	2	0	4	1	100	50	50	0
161	0	9	0	0	6	0	0	0	1	0	0	0	0	0	0	0	0	0	7	0	0	7	7	0	6	0	7	1	100	0	85.7143	0
162	0	9	0	0	0	0	1	0	4	0	0	0	0	0	0	0	0	0	4	1	0	5	4	1	1	0	5	1	100	20	20	0
163	0	9	0	0	2	1	1	1	5	0	0	0	0	0	0	0	1	1	7	1	2	8	8	2	4	0	10	1	80	20	40	0
164	0	9	0	0	12	1	7	1	11	0	0	0	0	0	0	0	1	1	23	7	2	30	24	8	20	0	32	1	93.75	25	62.5	0
165	0	9	0	1	4	0	0	1	1	0	0	0	0	0	0	0	2	0	5	0	2	5	7	0	5	0	7	1	71.4286	0	71.4286	0
166	0	9	0	0	6	1	0	1	6	0	0	0	0	0	0	0	1	1	12	0	2	12	13	1	7	0	14	1	85.7143	7.14286	50	0
167	0	9	0	0	4	1	2	1	3	0	0	0	0	0	0	0	1	1	7	2	2	9	8	3	7	0	11	1	81.8182	27.2727	63.6364	0
168	0	9	0	0	2	0	0	0	4	0	0	0	0	0	0	0	0	0	6	0	0	6	6	0	2	0	6	1	100	0	33.3333	0
169	0	9	0	0	4	0	2	0	2	0	0	0	0	0	0	0	0	0	6	2	0	8	6	2	6	0	8	1	100	25	75	0
170	0	9	0	0	11	0	0	0	5	0	0	0	0	0	0	0	0	0	16	0	0	16	16	0	11	0	16	1	100	0	68.75	0
171	0	9	0	0	4	0	0	0	1	0	0	0	0	0	0	0	0	0	5	0	0	5	5	0	4	0	5	1	100	0	80	0
172	0	9	0	0	11	0	2	0	5	0	0	0	0	0	0	0	0	0	16	2	0	18	16	2	13	0	18	1	100	11.1111	72.2222	0
173	0	9	0	0	0	0	1	0	1	0	1	0	0	0	0	1	0	0	1	2	0	3	1	2	1	0	3	1	100	66.6667	33.3333	0
174	0	9	0	1	0	0	1	0	1	0	1	0	0	0	0	1	1	0	1	2	1	3	2	2	2	0	4	1	75	50	50	0
175	0	9	0	0	0	0	1	0	2	0	0	0	0	0	0	0	0	0	2	1	0	3	2	1	1	0	3	1	100	33.3333	33.3333	0
176	0	9	0	0	1	0	0	0	0	0	0	0	0	0	0	0	0	0	1	0	0	1	1	0	1	0	1	1	100	0	100	0
177	0	9	0	0	1	0	3	0	7	0	0	0	0	0	0	0	0	0	8	3	0	11	8	3	4	0	11	1	100	27.2727	36.3636	0
178	0	9	0	0	2	0	0	0	0	0	0	0	0	0	0	0	0	0	2	0	0	2	2	0	2	0	2	1	100	0	100	0
179	0	9	0	0	0	0	2	0	1	0	0	0	0	0	0	0	0	0	1	2	0	3	1	2	2	0	3	1	100	66.6667	66.6667	0
180	0	9	0	0	5	0	2	0	4	0	0	0	0	0	0	0	0	0	9	2	0	11	9	2	7	0	11	1	100	18.1818	63.6364	0
181	0	9	0	0	6	0	0	0	1	0	0	0	0	0	0	0	0	0	7	0	0	7	7	0	6	0	7	1	100	0	85.7143	0
182	0	9	0	0	1	0	0	0	0	0	0	0	0	0	0	0	0	0	1	0	0	1	1	0	1	0	1	1	100	0	100	0
183	0	9	0	0	0	0	2	0	3	0	0	0	0	0	0	0	0	0	3	2	0	5	3	2	2	0	5	1	100	40	40	0
184	0	9	0	0	1	0	0	0	2	0	0	0	0	0	0	0	0	0	3	0	0	3	3	0	1	0	3	1	100	0	33.3333	0
185	0	9	0	0	0	0	0	0	2	0	0	0	0	0	0	0	0	0	2	0	0	2	2	0	0	0	2	1	100	0	0	0
186	0	9	0	0	1	0	2	0	3	0	0	0	0	0	0	0	0	0	4	2	0	6	4	2	3	0	6	1	100	33.3333	50	0
187	0	9	0	0	2	0	2	0	3	0	0	0	0	0	0	0	0	0	5	2	0	7	5	2	4	0	7	1	100	28.5714	57.1429	0
188	0	9	0	0	2	0	1	0	1	0	0	0	0	0	0	0	0	0	3	1	0	4	3	1	3	0	4	1	100	25	75	0
189	0	9	0	0	2	0	0	0	1	0	0	0	0	0	0	0	0	0	3	0	0	3	3	0	2	0	3	1	100	0	66.6667	0
190	0	9	0	0	2	0	0	0	0	0	0	0	0	0	0	0	0	0	2	0	0	2	2	0	2	0	2	1	100	0	100	0
191	0	9	0	2	3	1	0	1	1	0	0	0	0	0	0	0	3	1	4	0	4	4	7	1	6	0	8	1	50	12.5	75	0
192	0	9	0	0	4	0	1	0	2	0	0	0	0	0	0	0	0	0	6	1	0	7	6	1	5	0	7	1	100	14.2857	71.4286	0
193	0	9	0	0	0	0	0	0	0	0	0	0	0	0	0	0	0	0	0	0	0	0	0	0	0	0	0	1	#DIV/0!	#DIV/0!	#DIV/0!	#DIV/0!
194	0	9	0	0	0	0	0	0	0	0	0	0	0	0	0	0	0	0	0	0	0	0	0	0	0	0	0	1	#DIV/0!	#DIV/0!	#DIV/0!	#DIV/0!
195	0	9	0	0	3	0	1	0	4	0	0	0	0	0	0	0	0	0	7	1	0	8	7	1	4	0	8	1	100	12.5	50	0
196	0	9	0	1	0	0	0	0	3	0	0	0	0	0	0	0	1	0	3	0	1	3	4	0	1	0	4	1	75	0	25	0
197	0	9	0	0	0	0	3	0	4	0	0	0	0	0	0	0	0	0	4	3	0	7	4	3	3	0	7	1	100	42.8571	42.8571	0
198	0	9	0	1	2	0	1	0	1	0	0	0	0	0	0	0	1	0	3	1	1	4	4	1	4	0	5	1	80	20	80	0
199	0	9	0	0	0	0	0	0	1	0	0	0	0	0	0	0	0	0	1	0	0	1	1	0	0	0	1	1	100	0	0	0
200	0	9	0	0	1	0	0	0	0	0	0	0	0	0	0	0	0	0	1	0	0	1	1	0	1	0	1	1	100	0	100	0
201	0	9	0	0	0	0	0	0	0	0	0	0	0	0	0	0	0	0	0	0	0	0	0	0	0	0	0	1	#DIV/0!	#DIV/0!	#DIV/0!	#DIV/0!
202	0	9	0	0	0	0	0	0	0	0	0	0	0	0	0	0	0	0	0	0	0	0	0	0	0	0	0	1	#DIV/0!	#DIV/0!	#DIV/0!	#DIV/0!
203	0	9	0	0	4	0	0	0	2	0	0	0	0	0	0	0	0	0	6	0	0	6	6	0	4	0	6	1	100	0	66.6667	0
204	0	9	0	0	0	0	0	0	0	0	0	0	0	0	0	0	0	0	0	0	0	0	0	0	0	0	0	1	#DIV/0!	#DIV/0!	#DIV/0!	#DIV/0!
205	0	9	0	0	0	0	0	0	0	0	0	0	0	0	0	0	0	0	0	0	0	0	0	0	0	0	0	1	#DIV/0!	#DIV/0!	#DIV/0!	#DIV/0!
206	0	9	0	0	0	0	0	0	1	0	0	0	0	0	0	0	0	0	1	0	0	1	1	0	0	0	1	1	100	0	0	0
207	0	9	0	0	0	1	1	1	4	0	0	0	0	0	0	0	1	1	4	1	2	5	5	2	2	0	7	1	71.4286	28.5714	28.5714	0
208	0	9	0	0	6	0	4	0	5	0	0	0	0	0	0	0	0	0	11	4	0	15	11	4	10	0	15	1	100	26.6667	66.6667	0
209	0	9	0	0	2	0	0	0	0	0	0	0	0	0	0	0	0	0	2	0	0	2	2	0	2	0	2	1	100	0	100	0
210	0	9	0	0	0	0	1	1	5	0	0	0	0	0	0	0	1	0	5	1	1	6	6	1	1	0	7	1	85.7143	14.2857	14.2857	0
211	0	9	0	0	3	0	0	0	2	0	0	0	0	0	0	0	0	0	5	0	0	5	5	0	3	0	5	1	100	0	60	0
212	0	9	0	0	0	0	0	0	1	0	0	0	0	0	0	0	0	0	1	0	0	1	1	0	0	0	1	1	100	0	0	0
213	0	9	0	0	0	0	0	0	0	0	0	0	0	0	0	0	0	0	0	0	0	0	0	0	0	0	0	1	#DIV/0!	#DIV/0!	#DIV/0!	#DIV/0!
214	0	9	0	0	1	0	0	0	0	0	0	0	0	0	0	0	0	0	1	0	0	1	1	0	1	0	1	1	100	0	100	0
215	0	9	0	0	0	0	0	1	1	0	0	0	0	0	0	0	1	0	1	0	1	1	2	0	0	0	2	1	50	0	0	0
216	0	9	0	0	3	0	0	0	0	0	0	0	0	0	0	0	0	0	3	0	0	3	3	0	3	0	3	1	100	0	100	0
217	0	9	0	0	0	0	0	0	0	0	0	0	0	0	0	0	0	0	0	0	0	0	0	0	0	0	0	1	#DIV/0!	#DIV/0!	#DIV/0!	#DIV/0!
218	0	9	0	0	0	0	0	0	0	0	0	0	0	0	0	0	0	0	0	0	0	0	0	0	0	0	0	1	#DIV/0!	#DIV/0!	#DIV/0!	#DIV/0!
219	0	9	0	0	0	0	0	0	0	0	0	0	0	0	0	0	0	0	0	0	0	0	0	0	0	0	0	1	#DIV/0!	#DIV/0!	#DIV/0!	#DIV/0!
220	0	9	0	0	2	0	0	0	0	0	0	0	0	0	0	0	0	0	2	0	0	2	2	0	2	0	2	1	100	0	100	0
221	0	9	0	0	0	0	0	0	0	0	0	0	0	0	0	0	0	0	0	0	0	0	0	0	0	0	0	1	#DIV/0!	#DIV/0!	#DIV/0!	#DIV/0!
222	0	9	0	0	0	0	0	0	0	0	0	0	0	0	0	0	0	0	0	0	0	0	0	0	0	0	0	1	#DIV/0!	#DIV/0!	#DIV/0!	#DIV/0!
223	0	9	0	0	0	0	0	0	0	0	0	0	0	0	0	0	0	0	0	0	0	0	0	0	0	0	0	1	#DIV/0!	#DIV/0!	#DIV/0!	#DIV/0!
224	0	9	0	0	0	0	0	0	0	0	0	0	0	0	0	0	0	0	0	0	0	0	0	0	0	0	0	1	#DIV/0!	#DIV/0!	#DIV/0!	#DIV/0!
225	0	9	0	1	1	0	0	0	1	0	0	0	0	0	0	0	1	0	2	0	1	2	3	0	2	0	3	1	66.6667	0	66.6667	0
226	0	9	0	0	3	0	0	0	1	0	0	0	0	0	0	0	0	0	4	0	0	4	4	0	3	0	4	1	100	0	75	0
227	0	9	0	0	2	0	0	0	0	0	0	0	0	0	0	0	0	0	2	0	0	2	2	0	2	0	2	1	100	0	100	0
228	0	9	0	0	4	0	0	0	1	0	0	0	0	0	0	0	0	0	5	0	0	5	5	0	4	0	5	1	100	0	80	0
229	0	9	0	0	0	0	0	1	1	0	0	0	0	0	0	0	1	0	1	0	1	1	2	0	0	0	2	1	50	0	0	0
230	0	9	0	0	2	0	0	0	1	0	0	0	0	0	0	0	0	0	3	0	0	3	3	0	2	0	3	1	100	0	66.6667	0
231	0	9	0	0	2	0	0	0	0	0	0	0	0	0	0	0	0	0	2	0	0	2	2	0	2	0	2	1	100	0	100	0
232	0	9	0	0	1	0	0	0	1	0	0	0	0	0	0	0	0	0	2	0	0	2	2	0	1	0	2	1	100	0	50	0
233	0	9	0	0	0	0	0	0	1	0	0	0	0	0	0	0	0	0	1	0	0	1	1	0	0	0	1	1	100	0	0	0
234	0	9	0	0	1	0	0	0	1	0	0	0	0	0	0	0	0	0	2	0	0	2	2	0	1	0	2	1	100	0	50	0
235	0	9	0	1	0	0	0	0	1	0	0	0	0	0	0	0	1	0	1	0	1	1	2	0	1	0	2	1	50	0	50	0
236	0	9	0	0	3	0	0	0	1	0	0	0	0	0	0	0	0	0	4	0	0	4	4	0	3	0	4	1	100	0	75	0
237	0	9	0	0	3	0	0	0	1	0	0	0	0	0	0	0	0	0	4	0	0	4	4	0	3	0	4	1	100	0	75	0
238	0	9	0	1	2	0	0	0	0	0	0	0	0	0	0	0	1	0	2	0	1	2	3	0	3	0	3	1	66.6667	0	100	0
239	0	9	0	1	2	0	0	1	2	0	0	0	0	0	0	0	2	0	4	0	2	4	6	0	3	0	6	1	66.6667	0	50	0
240	0	9	0	0	3	0	0	0	2	0	0	0	0	0	0	0	0	0	5	0	0	5	5	0	3	0	5	1	100	0	60	0
241	0	9	0	17	140	2	10	5	77	1	0	0	0	0	0	1	22	3	217	10	25	227	239	13	169	0	252	1	90.0794	5.15873	67.0635	0
242	0	9	0	3	52	1	8	0	27	0	0	0	0	0	0	0	3	1	79	8	4	87	82	9	64	0	91	1	95.6044	9.89011	70.3297	0
122	0	10	0	0	4	0	4	0	4	0	0	0	0	0	0	0	0	0	8	4	0	12	8	4	8	0	12	1	100	33.3333	66.6667	0
123	0	10	0	0	4	0	0	0	0	0	0	0	0	0	0	0	0	0	4	0	0	4	4	0	4	0	4	1	100	0	100	0
124	0	10	0	3	2	0	8	0	10	0	0	0	0	0	0	0	3	0	12	8	3	20	15	8	13	0	23	1	86.9565	34.7826	56.5217	0
125	0	10	0	0	24	0	7	0	10	0	0	0	0	0	0	0	0	0	34	7	0	41	34	7	31	0	41	1	100	17.0732	75.6098	0
126	0	10	0	0	19	1	3	1	10	0	1	0	0	0	0	1	1	1	29	4	2	33	30	5	23	0	35	1	94.2857	14.2857	65.7143	0
127	0	10	0	0	16	2	3	0	4	0	0	0	0	0	0	0	0	2	20	3	2	23	20	5	21	0	25	1	92	20	84	0
128	0	10	0	0	9	1	4	0	2	2	1	0	0	0	0	3	0	3	11	5	3	16	11	8	14	0	19	1	84.2105	42.1053	73.6842	0
129	0	10	0	0	1	0	16	0	18	0	0	0	0	0	0	0	0	0	19	16	0	35	19	16	17	0	35	1	100	45.7143	48.5714	0
130	0	10	0	0	2	2	45	2	47	0	2	0	0	0	0	2	2	2	49	47	4	96	51	49	49	0	100	1	96	49	49	0
131	0	10	0	0	0	0	8	0	9	0	2	0	0	0	0	2	0	0	9	10	0	19	9	10	8	0	19	1	100	52.6316	42.1053	0
132	0	10	0	0	7	1	21	0	20	0	0	0	0	0	0	0	0	1	27	21	1	48	27	22	29	0	49	1	97.9592	44.898	59.1837	0
133	0	10	0	0	0	1	5	1	5	1	0	0	0	0	0	1	1	2	5	5	3	10	6	7	6	0	13	1	76.9231	53.8462	46.1538	0
134	0	10	0	0	11	3	5	3	5	1	0	0	0	0	0	1	3	4	16	5	7	21	19	9	19	0	28	1	75	32.1429	67.8571	0
135	0	10	0	0	1	0	0	0	1	0	0	0	0	0	0	0	0	0	2	0	0	2	2	0	1	0	2	1	100	0	50	0
136	0	10	0	0	0	2	6	0	6	0	0	0	0	0	0	0	0	2	6	6	2	12	6	8	8	0	14	1	85.7143	57.1429	57.1429	0
137	0	10	0	0	1	0	2	0	2	0	0	0	0	0	0	0	0	0	3	2	0	5	3	2	3	0	5	1	100	40	60	0
138	0	10	0	4	11	1	2	1	2	0	0	0	0	0	0	0	5	1	13	2	6	15	18	3	18	0	21	1	71.4286	14.2857	85.7143	0
139	0	10	0	0	1	0	1	0	3	0	0	0	0	0	0	0	0	0	4	1	0	5	4	1	2	0	5	1	100	20	40	0
140	0	10	0	0	5	0	1	0	3	1	0	0	0	0	0	1	0	1	8	1	1	9	8	2	6	0	10	1	90	20	60	0
141	0	10	0	0	1	0	20	0	26	0	0	0	0	0	0	0	0	0	27	20	0	47	27	20	21	0	47	1	100	42.5532	44.6809	0
142	0	10	0	0	5	0	9	0	9	0	0	0	0	0	0	0	0	0	14	9	0	23	14	9	14	0	23	1	100	39.1304	60.8696	0
143	0	10	0	0	6	0	9	0	10	0	0	0	0	0	0	0	0	0	16	9	0	25	16	9	15	0	25	1	100	36	60	0
144	0	10	0	0	5	0	1	0	2	0	0	0	0	0	0	0	0	0	7	1	0	8	7	1	6	0	8	1	100	12.5	75	0
145	0	10	0	1	1	0	6	1	6	0	0	0	0	0	0	0	2	0	7	6	2	13	9	6	8	0	15	1	86.6667	40	53.3333	0
146	0	10	0	0	3	0	5	0	5	0	0	0	0	0	0	0	0	0	8	5	0	13	8	5	8	0	13	1	100	38.4615	61.5385	0
147	0	10	0	0	2	0	6	0	6	0	0	0	0	0	0	0	0	0	8	6	0	14	8	6	8	0	14	1	100	42.8571	57.1429	0
148	0	10	0	0	4	0	10	0	13	0	1	0	0	0	0	1	0	0	17	11	0	28	17	11	14	0	28	1	100	39.2857	50	0
149	0	10	0	0	3	0	3	0	3	0	0	0	0	0	0	0	0	0	6	3	0	9	6	3	6	0	9	1	100	33.3333	66.6667	0
150	0	10	0	0	2	0	0	0	2	0	0	0	0	0	0	0	0	0	4	0	0	4	4	0	2	0	4	1	100	0	50	0
151	0	10	0	0	0	0	0	0	1	0	0	0	0	0	0	0	0	0	1	0	0	1	1	0	0	0	1	1	100	0	0	0
152	0	10	0	1	0	1	2	3	7	0	0	0	0	0	0	0	4	1	7	2	5	9	11	3	4	0	14	1	64.2857	21.4286	28.5714	0
153	0	10	0	0	4	1	9	1	8	0	0	0	0	0	0	0	1	1	12	9	2	21	13	10	14	0	23	1	91.3043	43.4783	60.8696	0
154	0	10	0	0	3	0	8	0	9	0	0	0	0	0	0	0	0	0	12	8	0	20	12	8	11	0	20	1	100	40	55	0
155	0	10	0	0	1	0	0	0	0	0	0	0	0	0	0	0	0	0	1	0	0	1	1	0	1	0	1	1	100	0	100	0
156	0	10	0	0	2	0	2	0	3	0	0	0	0	0	0	0	0	0	5	2	0	7	5	2	4	0	7	1	100	28.5714	57.1429	0
157	0	10	0	0	1	1	1	1	2	0	0	0	0	0	0	0	1	1	3	1	2	4	4	2	3	0	6	1	66.6667	33.3333	50	0
158	0	10	0	0	2	0	1	0	1	0	0	0	0	0	0	0	0	0	3	1	0	4	3	1	3	0	4	1	100	25	75	0
159	0	10	0	2	3	1	1	0	1	0	0	0	0	0	0	0	2	1	4	1	3	5	6	2	7	0	8	1	62.5	25	87.5	0
160	0	10	0	1	6	1	1	0	0	0	1	0	0	0	0	1	1	1	6	2	2	8	7	3	9	0	10	1	80	30	90	0
161	0	10	0	0	1	0	0	0	0	0	0	0	0	0	0	0	0	0	1	0	0	1	1	0	1	0	1	1	100	0	100	0
162	0	10	0	0	2	0	2	0	3	0	0	0	0	0	0	0	0	0	5	2	0	7	5	2	4	0	7	1	100	28.5714	57.1429	0
163	0	10	0	1	6	8	2	8	6	0	0	0	0	0	0	0	9	8	12	2	17	14	21	10	17	0	31	1	45.1613	32.2581	54.8387	0
164	0	10	0	0	1	0	1	0	5	1	1	0	0	0	0	2	0	1	6	2	1	8	6	3	2	0	9	1	88.8889	33.3333	22.2222	0
165	0	10	0	0	4	0	5	0	7	0	0	0	0	0	0	0	0	0	11	5	0	16	11	5	9	0	16	1	100	31.25	56.25	0
166	0	10	0	0	2	0	3	0	3	0	0	0	0	0	0	0	0	0	5	3	0	8	5	3	5	0	8	1	100	37.5	62.5	0
167	0	10	0	0	2	0	0	1	2	0	0	0	0	0	0	0	1	0	4	0	1	4	5	0	2	0	5	1	80	0	40	0
168	0	10	0	0	9	0	0	1	0	0	0	0	0	0	0	0	1	0	9	0	1	9	10	0	9	0	10	1	90	0	90	0
169	0	10	0	0	0	0	0	0	1	0	0	0	0	0	0	0	0	0	1	0	0	1	1	0	0	0	1	1	100	0	0	0
170	0	10	0	0	3	0	2	0	5	0	0	0	0	0	0	0	0	0	8	2	0	10	8	2	5	0	10	1	100	20	50	0
171	0	10	0	0	4	0	2	0	2	0	0	0	0	0	0	0	0	0	6	2	0	8	6	2	6	0	8	1	100	25	75	0
172	0	10	0	0	8	0	1	0	8	0	0	0	0	0	0	0	0	0	16	1	0	17	16	1	9	0	17	1	100	5.88235	52.9412	0
173	0	10	0	0	0	0	1	0	2	0	1	0	0	0	0	1	0	0	2	2	0	4	2	2	1	0	4	1	100	50	25	0
174	0	10	0	0	2	0	1	0	1	0	0	0	0	0	0	0	0	0	3	1	0	4	3	1	3	0	4	1	100	25	75	0
175	0	10	0	0	0	0	1	0	3	0	0	0	0	0	0	0	0	0	3	1	0	4	3	1	1	0	4	1	100	25	25	0
176	0	10	0	0	2	0	1	0	3	0	0	0	0	0	0	0	0	0	5	1	0	6	5	1	3	0	6	1	100	16.6667	50	0
177	0	10	0	0	1	0	1	0	1	0	0	0	0	0	0	0	0	0	2	1	0	3	2	1	2	0	3	1	100	33.3333	66.6667	0
178	0	10	0	0	5	0	0	0	1	0	0	0	0	0	0	0	0	0	6	0	0	6	6	0	5	0	6	1	100	0	83.3333	0
179	0	10	0	0	6	0	2	0	4	0	0	0	0	0	0	0	0	0	10	2	0	12	10	2	8	0	12	1	100	16.6667	66.6667	0
180	0	10	0	0	5	0	0	0	3	0	0	0	0	0	0	0	0	0	8	0	0	8	8	0	5	0	8	1	100	0	62.5	0
181	0	10	0	4	2	0	0	0	0	0	0	0	0	0	0	0	4	0	2	0	4	2	6	0	6	0	6	1	33.3333	0	100	0
182	0	10	0	0	0	0	0	0	1	0	0	0	0	0	0	0	0	0	1	0	0	1	1	0	0	0	1	1	100	0	0	0
183	0	10	0	0	7	0	0	0	3	0	0	0	0	0	0	0	0	0	10	0	0	10	10	0	7	0	10	1	100	0	70	0
184	0	10	0	0	0	0	0	0	1	0	0	0	0	0	0	0	0	0	1	0	0	1	1	0	0	0	1	1	100	0	0	0
185	0	10	0	0	1	0	1	1	3	0	0	0	0	0	0	0	1	0	4	1	1	5	5	1	2	0	6	1	83.3333	16.6667	33.3333	0
186	0	10	0	0	0	0	0	0	0	0	0	0	0	0	0	0	0	0	0	0	0	0	0	0	0	0	0	1	#DIV/0!	#DIV/0!	#DIV/0!	#DIV/0!
187	0	10	0	0	1	0	1	0	2	0	0	0	0	0	0	0	0	0	3	1	0	4	3	1	2	0	4	1	100	25	50	0
188	0	10	0	0	4	0	0	0	0	0	0	0	0	0	0	0	0	0	4	0	0	4	4	0	4	0	4	1	100	0	100	0
189	0	10	0	0	2	0	2	0	2	0	0	0	0	0	0	0	0	0	4	2	0	6	4	2	4	0	6	1	100	33.3333	66.6667	0
190	0	10	0	0	3	0	2	0	2	0	0	0	0	0	0	0	0	0	5	2	0	7	5	2	5	0	7	1	100	28.5714	71.4286	0
191	0	10	0	0	0	0	0	0	1	0	0	0	0	0	0	0	0	0	1	0	0	1	1	0	0	0	1	1	100	0	0	0
192	0	10	0	0	1	0	0	0	0	0	0	0	0	0	0	0	0	0	1	0	0	1	1	0	1	0	1	1	100	0	100	0
193	0	10	0	0	3	0	0	0	0	1	0	0	0	0	0	1	0	1	3	0	1	3	3	1	3	0	4	1	75	25	75	0
194	0	10	0	0	1	0	0	0	0	0	0	0	0	0	0	0	0	0	1	0	0	1	1	0	1	0	1	1	100	0	100	0
195	0	10	0	0	1	0	1	0	0	0	0	0	0	0	0	0	0	0	1	1	0	2	1	1	2	0	2	1	100	50	100	0
196	0	10	0	0	1	0	0	0	1	0	0	0	0	0	0	0	0	0	2	0	0	2	2	0	1	0	2	1	100	0	50	0
197	0	10	0	0	0	0	0	1	0	0	0	0	0	0	0	0	1	0	0	0	1	0	1	0	0	0	1	1	0	0	0	0
198	0	10	0	0	0	0	4	0	8	0	0	0	0	0	0	0	0	0	8	4	0	12	8	4	4	0	12	1	100	33.3333	33.3333	0
199	0	10	0	0	2	1	0	1	3	0	0	0	0	0	0	0	1	1	5	0	2	5	6	1	3	0	7	1	71.4286	14.2857	42.8571	0
200	0	10	0	0	1	0	1	0	1	0	0	0	0	0	0	0	0	0	2	1	0	3	2	1	2	0	3	1	100	33.3333	66.6667	0
201	0	10	0	0	2	0	0	0	0	0	0	0	0	0	0	0	0	0	2	0	0	2	2	0	2	0	2	1	100	0	100	0
202	0	10	0	0	0	0	0	0	0	0	0	0	0	0	0	0	0	0	0	0	0	0	0	0	0	0	0	1	#DIV/0!	#DIV/0!	#DIV/0!	#DIV/0!
203	0	10	0	0	3	0	0	0	1	0	0	0	0	0	0	0	0	0	4	0	0	4	4	0	3	0	4	1	100	0	75	0
204	0	10	0	2	0	0	0	0	0	0	0	0	0	0	0	0	2	0	0	0	2	0	2	0	2	0	2	1	0	0	100	0
205	0	10	0	0	3	0	0	0	1	0	0	0	0	0	0	0	0	0	4	0	0	4	4	0	3	0	4	1	100	0	75	0
206	0	10	0	0	3	0	0	0	1	0	0	0	0	0	0	0	0	0	4	0	0	4	4	0	3	0	4	1	100	0	75	0
207	0	10	0	0	1	1	2	2	2	0	0	0	0	0	0	0	2	1	3	2	3	5	5	3	4	0	8	1	62.5	37.5	50	0
208	0	10	0	0	1	0	1	0	1	0	0	0	0	0	0	0	0	0	2	1	0	3	2	1	2	0	3	1	100	33.3333	66.6667	0
209	0	10	0	0	1	0	1	0	3	0	0	0	0	0	0	0	0	0	4	1	0	5	4	1	2	0	5	1	100	20	40	0
210	0	10	0	0	2	0	0	0	4	0	0	0	0	0	0	0	0	0	6	0	0	6	6	0	2	0	6	1	100	0	33.3333	0
211	0	10	0	0	3	0	2	0	2	0	0	0	0	0	0	0	0	0	5	2	0	7	5	2	5	0	7	1	100	28.5714	71.4286	0
212	0	10	0	0	1	0	1	0	1	0	0	0	0	0	0	0	0	0	2	1	0	3	2	1	2	0	3	1	100	33.3333	66.6667	0
213	0	10	0	0	0	0	0	0	0	0	0	0	0	0	0	0	0	0	0	0	0	0	0	0	0	0	0	1	#DIV/0!	#DIV/0!	#DIV/0!	#DIV/0!
214	0	10	0	0	0	0	0	0	0	0	0	0	0	0	0	0	0	0	0	0	0	0	0	0	0	0	0	1	#DIV/0!	#DIV/0!	#DIV/0!	#DIV/0!
215	0	10	0	0	1	0	0	1	1	0	0	0	0	0	0	0	1	0	2	0	1	2	3	0	1	0	3	1	66.6667	0	33.3333	0
216	0	10	0	0	1	0	0	0	0	0	0	0	0	0	0	0	0	0	1	0	0	1	1	0	1	0	1	1	100	0	100	0
217	0	10	0	0	0	0	0	0	0	0	0	0	0	0	0	0	0	0	0	0	0	0	0	0	0	0	0	1	#DIV/0!	#DIV/0!	#DIV/0!	#DIV/0!
218	0	10	0	0	0	0	0	0	1	0	0	0	0	0	0	0	0	0	1	0	0	1	1	0	0	0	1	1	100	0	0	0
219	0	10	0	0	0	0	0	0	0	0	0	0	0	0	0	0	0	0	0	0	0	0	0	0	0	0	0	1	#DIV/0!	#DIV/0!	#DIV/0!	#DIV/0!
220	0	10	0	0	0	0	0	0	0	0	0	0	0	0	0	0	0	0	0	0	0	0	0	0	0	0	0	1	#DIV/0!	#DIV/0!	#DIV/0!	#DIV/0!
221	0	10	0	0	0	0	0	0	0	0	0	0	0	0	0	0	0	0	0	0	0	0	0	0	0	0	0	1	#DIV/0!	#DIV/0!	#DIV/0!	#DIV/0!
222	0	10	0	0	0	0	0	0	0	0	0	0	0	0	0	0	0	0	0	0	0	0	0	0	0	0	0	1	#DIV/0!	#DIV/0!	#DIV/0!	#DIV/0!
223	0	10	0	0	0	0	0	0	1	0	0	0	0	0	0	0	0	0	1	0	0	1	1	0	0	0	1	1	100	0	0	0
224	0	10	0	0	0	0	0	0	0	0	0	0	0	0	0	0	0	0	0	0	0	0	0	0	0	0	0	1	#DIV/0!	#DIV/0!	#DIV/0!	#DIV/0!
225	0	10	0	0	1	0	1	0	1	0	0	0	0	0	0	0	0	0	2	1	0	3	2	1	2	0	3	1	100	33.3333	66.6667	0
226	0	10	0	0	1	0	0	0	0	0	0	0	0	0	0	0	0	0	1	0	0	1	1	0	1	0	1	1	100	0	100	0
227	0	10	0	0	0	0	0	0	0	0	0	0	0	0	0	0	0	0	0	0	0	0	0	0	0	0	0	1	#DIV/0!	#DIV/0!	#DIV/0!	#DIV/0!
228	0	10	0	0	0	0	1	0	1	0	0	0	0	0	0	0	0	0	1	1	0	2	1	1	1	0	2	1	100	50	50	0
229	0	10	0	0	0	0	0	0	0	0	0	0	0	0	0	0	0	0	0	0	0	0	0	0	0	0	0	1	#DIV/0!	#DIV/0!	#DIV/0!	#DIV/0!
230	0	10	0	0	0	0	0	0	2	0	0	0	0	0	0	0	0	0	2	0	0	2	2	0	0	0	2	1	100	0	0	0
231	0	10	0	0	0	0	2	0	4	0	0	0	0	0	0	0	0	0	4	2	0	6	4	2	2	0	6	1	100	33.3333	33.3333	0
232	0	10	0	0	0	0	0	0	0	0	0	0	0	0	0	0	0	0	0	0	0	0	0	0	0	0	0	1	#DIV/0!	#DIV/0!	#DIV/0!	#DIV/0!
233	0	10	0	0	2	1	0	1	2	0	0	0	0	0	0	0	1	1	4	0	2	4	5	1	3	0	6	1	66.6667	16.6667	50	0
234	0	10	0	0	3	0	0	0	0	0	0	0	0	0	0	0	0	0	3	0	0	3	3	0	3	0	3	1	100	0	100	0
235	0	10	0	0	2	0	1	0	1	0	0	0	0	0	0	0	0	0	3	1	0	4	3	1	3	0	4	1	100	25	75	0
236	0	10	0	0	4	0	0	0	1	0	0	0	0	0	0	0	0	0	5	0	0	5	5	0	4	0	5	1	100	0	80	0
237	0	10	0	0	1	0	0	0	0	0	0	0	0	0	0	0	0	0	1	0	0	1	1	0	1	0	1	1	100	0	100	0
238	0	10	0	0	0	0	0	0	0	0	0	0	0	0	0	0	0	0	0	0	0	0	0	0	0	0	0	1	#DIV/0!	#DIV/0!	#DIV/0!	#DIV/0!
239	0	10	0	0	1	0	0	0	3	0	0	0	0	0	0	0	0	0	4	0	0	4	4	0	1	0	4	1	100	0	25	0
240	0	10	0	0	4	0	0	0	2	0	0	0	0	0	0	0	0	0	6	0	0	6	6	0	4	0	6	1	100	0	66.6667	0
241	0	10	0	24	128	7	23	15	73	0	9	0	0	0	0	9	39	7	201	32	46	233	240	39	182	0	279	1	83.5125	13.9785	65.233	0
242	0	10	0	2	43	1	9	2	37	0	0	0	0	0	0	0	4	1	80	9	5	89	84	10	55	0	94	1	94.6809	10.6383	58.5106	0
